# Supplementary material for: Metabolomic Biomarkers Predict Long-term Physical Function in Survivors of Acute Respiratory Failure
Source: Research Square preprint supplement (doi:10.21203/rs.3.rs-7394034/v1), 2025-11-02
Supplement: Supplementary file 2 [file 2c7faa6931b2d62b0b315643.xlsx]

## Sheet: Sheet1
Metric	Standard Logistic Regression	Bayesian Logistic Regression	Standard Logistic Regression 5-fold CV	Bayesian Logistic Regression 5-fold CV
AUC	0.94	0.94	0.86	0.88
Accuracy	0.86	0.86	0.75	0.81
Precision	0.88	0.88	0.76	0.86
Recall	0.86	0.86	0.7	0.8
F1 Score	0.87	0.87	0.72	0.8
MCC	0.72	0.72	0.51	0.67
Cohen's Kappa	0.72	0.72	0.5	0.62
