# Supplementary material for: Metabolomic Biomarkers Predict Long-term Physical Function in Survivors of Acute Respiratory Failure
Source: Research Square preprint supplement (doi:10.21203/rs.3.rs-7394034/v1), 2025-11-02
Supplement: Supplementary file 3 [file f0bcaf98212ccd03006b05cf.xlsx]

## Sheet: Normalized_Serum_Metabolites
PARENT_SAMPLE_NAME	GROUP_ID	55	93	98	111	112	136	144	158	171	180	181	182	187	189	192	194	197	209	212	229	231	234	235	240	241	244	250	252	254	266	267	273	275	278	279	297	302	310	313	314	330	331	338	339	340	342	344	355
UNSA-00002	D1_Good	3.60431	1.5702	1.6714	2.53516	0.778471	11.0447	25.2121	1.48399	0.909946	0.421926	0.772898	9.942	1.09667	0.766172	1.27227	1.3642	1.56888	0.975354	1.98357	0.464016	0.811065	0.557771	2.02852	2.79593	0.47596	0.688283	2.03165	0.69035	2.24593	0.960146	1.10644	1.02282	1.25433		1.63217	1.66274		2.03357	1.11145	0.65235	1.42898	0.809153	0.524315	3.23283	0.721989	7.63786	2.83717	1.14208
UNSA-00007	D1_Good	1.3099	0.903094	2.38703	0.897424	1.06672	0.999231	0.867319	1.94732	1.12915	0.985407	0.863489	3.76877	2.79548	1.51498	1.71323	1.63333	0.785598		1.50425	1.03518	1.71302	1.5399	4.39536	1.09756	1.66226	0.938765	1.25649	0.982751	0.586744	1.42486	1.48209	0.147022	1.16119	1.36982	1.02803	1.54409	1.07159	1.25621	1.28476	0.441071	0.816014	0.655177	1.03949	0.632963	1.7684	3.01451	0.858824	1.85599
UNSA-00015	D1_Good	3.3902	1.32283	18.1218	1.37959	13.5885	0.395944	12.6148	0.818358	0.827225	0.373113	0.524462	23.3423	1.6317	1.62207	2.66562	3.41563	4.28294	0.444455	2.27833	0.567629	0.746177	1.06517	4.05335	1.06791	1.2967	1.32069	0.620421	0.529897	0.653067	1.01699	1.23438		4.23209	6.89058	1.67434	0.79247	1.22806	2.07989	0.599096	0.808558	0.885298		12.0237	1.97804	0.655484	1.1287	0.701356	0.858489
UNSA-00016	D1_Good	0.749389	1.09653	17.4572	0.805074	3.26711	0.765182	3.49518	5.45732	1.50629	2.5908	1.87028	49.9939	1.88216	2.1631	1.52015	2.77984	4.52505	1.05562	2.30265	2.01894	0.981518	0.559958	1.14034	2.07468		1.8304	1.27849	1.71514	4.84776	1.38778	0.951425		1.86124	1.8515	0.985479	0.88474		5.41248		1.39068	1.67711	0.735316	15.7711	0.988395	1.11903	0.4942	0.48386	0.695969
UNSA-00018	D1_Good	0.311235	0.865151	0.402545	0.393325	0.469878	0.366895	0.574663	0.754759	0.532607	0.921611	0.676226	0.247973	0.224523	0.399176	0.191446	0.471158		0.82015		0.871055	0.562962	0.416523	0.187681	0.527803	0.511085	0.535113	0.390859	0.471756	0.817978	0.552363	0.772716		0.433385	0.470589	0.899679	0.52573	0.992168	0.484346		0.64322	0.716879		0.57268	0.670593	0.580565	0.0427496	3.85029	0.691996
UNSA-00020	D1_Good	2.71528	2.70546	1.54406	2.58237	2.45131		0.752932	3.7998	2.52437	2.57641	1.81711	5.67136	1.0634	2.29598	1.48235	1.82531	1.80958	0.882665	1.83996	1.47831	0.902025	0.362185	1.27492	2.241	0.85358	0.992244	1.17549	0.967678	14.328	0.947023	0.755763	1.20465	2.0207	1.49988	1.28423	0.850562		7.7182	0.714753	2.78716	2.81998	0.854919	34.0649	3.25927	1.07479	0.0584546	1.18113	0.923982
UNSA-00023	D1_Good	0.821956	2.44734	1.26143	3.04134	1.94942	50.0614	3.40212	0.744349	1.06679	0.479035	1.68422	1.29639	0.864801	0.555977	3.54314	1.08501	1.26734	0.838407	0.262575	0.556817	0.758691	1.31468	1.78401	1.49071	1.3488	1.07101	1.54956	1.05817	9.1683	0.740948	0.658895	2.01935	1.43876	2.86583	0.857541	1.8641		1.93536	1.32681	0.56083	1.73794	2.01092	0.72056	1.81295	1.14914	10.5309	1.23884	1.25
UNSA-00024	D1_Good	0.202424	1.14092	0.323091	0.696208	0.971272		0.164841	0.416877	0.972241	1.51372	2.01981	0.935753	0.677852	0.3779	1.27637	0.762012	0.564959	1.14445	1.62142	1.58276	0.944354	1.16161	0.150311	0.768025	0.912787	0.553366	0.649406	0.448652	1.74854	1.26843	0.796867	1.13957	0.769598	2.47869	0.650823	2.32637	0.557089	0.645576	2.66391	0.965879	1.22763	0.66852	0.928648	0.389201	0.867193	0.0812004	0.413149	1.16179
UNSA-00028	D1_Good	0.448482	0.971062	0.423204	1	0.685409	0.282683	0.712247	0.927205	0.697536	0.998972	0.823961	0.907192	1.33864	1.21777	0.586055	0.728526		0.949736	0.284084	1.31283	1.39956	0.845542	0.671209	0.651273	1.23119	0.852984	1.23097	0.525968	1.41206	0.894233	0.695814		0.610874	0.92081	0.937632	0.634558	0.772729	1.04452	0.829435	1.5608	0.890333		1.42806	1.11372	0.960565	1.53481	1	1.15125
UNSA-00030	D1_Good	1.02856	0.710275	0.95691	3.26143	0.578242	0.978331	0.301498	0.702068	0.912693	1.96976	1.27203	1.42211	1.03623	1.14923	0.269252	0.552107		0.652743	0.22419	2.80623	1.35645	1.01135	0.325662	1.22117	1.17622	0.868602	1.00902	4.08078	7.03283	1.86106	0.887682	1.05703	0.660348	0.339578	0.855447	0.616211	1.02969	1.04617	0.90368	1.87396	0.827476	0.51666	0.506328	1.1459	0.993973	2.83454	0.58916	1.28214
UNSA-00034	D1_Good	1.26881	1.19991	0.951685	2.12198	1.20062	1.75905	0.517321	1.1483	1.00997	2.51358	1.37904	3.74313	0.789072	0.775549	1.16913	1.01311	0.580103	0.914464	0.609644	1.42261	1.17295	2.12196	1.00425	1.26701	1.28128	1.44157	1.19996	0.464351	2.40759	1.16754	1.0865	1.30094	1.2301	0.914529	1.49197	2.92731		0.595235	1.70481	1.9718	0.616746	1.40687	1.02226	1.02985	0.908044	2.39286	0.644163	1.19493
UNSA-00036	D1_Good	3.14328	2.07808	3.12728	1.5692	1.98062	1.76316	1.82877	2.02667	1.62499	1.56855	1.78016	0.946219	1.8513	1.50639	1.41351	2.08109	1.78185	1.14805	1.27667	2.37706	1.4082	1.0689	1.15481	1.4826	0.786815	1.58363	1.65804	0.236806	6.29052	1.61753	0.899974		1.74268	0.690784	2.24457	0.848239	1.00783	0.886545	1.15138	0.794022	3.58715	1.03113	0.918113	4.67429	1.1252	0.612486	1.20289	1.227
UNSA-00039	D1_Good	0.125122	0.0657655	0.0374373	0.185022	0.101245	0.72296			0.20289	0.0486275	0.370402		0.034296	0.00801996	0.0611555	0.102877		0.520958		0.0459314	0.0841436	0.115645	0.368231	0.108471	0.182303	0.17144	0.0557494	0.00761018	0.174639	0.130523	1.60443	0.140703	0.13176		0.0621271	0.35104				0.429563	0.115323		0.0886696	0.164439	0.0795947	0.0687339	1.91557	0.219476
UNSA-00040	D1_Good	2.40824	2.57376	1.99788	0.716688	3.30231	0.232649	0.715965	1.25597	0.69388	1.34663	1.74973	3.67236	1.00058	1.07301	2.72625	1.00596	1.66427	1.01694	1.82957	0.646539	0.862078	1.0395	1.45072	1.39554	1.01746	1.19007	1.69898	3.43197	1.55517	0.635985	0.998373	0.938199	1.67532	1.9731	1.51097	1.22464		1.47362	1.47368	0.981473	1.37215	1.31352	94.137	1	1.49014	0.356725	0.977929	1.08873
UNSA-00041	D1_Good	0.764874	1.38776	1.77802	2.66828	1.27326	1.00077	1.37321	0.980854	0.465217	1.50381	1.64423	4.02817	0.903986	1.068	6.90982	2.0205	2.0112	9.8527	1.79688	0.879576	0.989261	0.226481	3.10815	1.22753	1.14024	1.16887	0.572909	0.0996096	4.1638	0.774855	0.951828		1.54188	5.66457	0.798441	0.703676		1.31874	0.787569	1.01718	0.991182		1.24488	1.97188	0.928595	0.662981	0.479257	1.53295
UNSA-00046	D1_Good	2.20973	0.997522	2.71657	1.48018	0.812981	0.693833	0.988376	1.35929	1.55884	1.06092	0.989104	4.38541	3.72238	1.28883	1.05549	1.17424	0.927559	1.00107	1.53715	1.09118	1.35244	1.49401	1.4066	1.45163	1.06858	1.17673	0.80109	0.721066	3.06471	0.896439	0.757969	0.246372	0.669367	0.692148	1.03866	0.715662	0.533001	0.526723		0.72294	0.679145		0.741451	0.918697	0.969024	0.571387	1.00674	1.34104
UNSA-00048	D1_Good	0.273366	0.0550137	0.317011	0.418497	0.138018	0.149249			0.216795	0.0316289	0.332166	0.846034	0.0380194	0.013705	0.0626122	0.0989217		0.838917		0.0238605	0.0369732	0.146953	8.18408	0.201568		0.121211		0.560686	0.602141	0.109212	0.776276		0.155665		0.0417174	0.250261	0.0857872			0.29596	0.104235		0.0935295	0.171695	0.101499	0.0207398	0.824151	0.177329
UNSA-00052	D1_Good	3.01684	0.969027	0.97424	1.8393	0.754063	0.281615	1.31528	1.87119	1.99805	1.24487	1.07179	0.121735	1.47967	0.640345	0.480251	0.954133	0.802176	0.892033	0.557313	1.41453	1.32897	1.68435	1.89458	0.845502	1.50393	1.34094	1.3617	0.0798338	1.81081	2.05255	0.779811	3.09084	0.969062	1.22845	2.03861	1.21128	1.88262	0.534386	0.689753	1.00576	0.747078	0.36229	1.95681	0.993714	1.36626	0.174467	0.972194	1.16769
UNSA-00056	D1_Good	11.463	1.43744	44.6812	4.12758	11.793	0.963834	4.63174	2.48888	0.916162	2.19198	1.7578	34.5868	5.40408	5.2484	3.3224	7.92871	9.62057	0.554031	6.11828	1.91358	1.17009	0.540771	19.4159	5.69877	13.0359	1.76303	2.22717	1.09761	15.3454	1.20273	1.1034	1.36199	7.78536	10.2378	1.12249	0.683716		17.7689	0.574584	1.11121	1.6244	0.427448	42.8467	1.32727	1.37587	5.09854	2.3956	1.27438
UNSA-00058	D1_Good	2.80463	1.93029	15.8266		5.95452	0.207462	1.43706	1.25284	2.11052	1.22543	0.824791	5.67977	1.27342	0.665884	1.60816	1.71606	2.54593	0.689257	0.745892	1.5973	0.316148	1.64458	1.67358	2.1713	1.26804	1.93627	0.981894	1.32526	12.3643	0.651964	1.89119		3.04208	3.71526	0.687787	2.12377	0.299669	1.29844	1.12446	1.08964	1.11469	1.42968	3.698	0.967656	0.532848	0.351086	0.627066	0.472811
UNSA-00063	D1_Good	1.34215	1.34085	1.24011	1.96544	1.0425	1.17293	0.924924	1.15061	0.842731	0.880801	0.843992	0.515349	1.05899	0.415974	2.19277	1.95944	0.768572	1.35921	0.67364	1.11109	0.787895	0.205394	1.6716	2.2894	1.28747	0.949067	0.798918	0.72314	1	0.865387	1.09311	0.623004	1.47522	5.98655	2.06515	0.562941	1.36472	1.54425	0.705433	0.432584	1.67552		1.71529	0.945542	1.11308	0.258294	1.88452	1.23208
UNSA-00067	D1_Good	4.6089	0.936395	0.448086	0.553292	1.10377	0.420137	0.67718	0.639322	1.29684	1.00103	4.085	0.70684	0.252208	0.366055	1.00628	0.790084	0.903543	0.974207	0.297939	0.970515	0.43893	1.06781	1	0.318712	0.609952	1.32144	0.227649	1.16245	0.517223	0.784891	1.4868		0.999887	1.06829	0.90442	1.03852	0.974543	0.283892	1.07505	1.187	0.716142	1.23346	0.937934	0.607755	0.650724	0.934248	1.36449	1.1179
UNSA-00068	D1_Good	0.565964	1.79486	0.835614	2.04175	0.612295	5.88744	3.20316	0.37556	0.861792	1.97174	0.666508	1.25304	0.538686	1.76103	0.542788	0.986815	0.564421	0.77038	0.483693	0.819302	1.67588	0.499843	1.3302	1.10812	1.09827	1.19332	0.609953	1.07134	0.943491	1.23538	0.79283		0.828985	1.41278	1.4196	0.668543	5.45269	3.89502		6.6708	1.99995	0.695312	2.84197	3.08373	1.21583	2.7149	0.192879	1.32785
UNSA-00070	D1_Good	4.41664	1.11084	2.61857	1.09181	0.572811	7.62384	1.56808	0.507542	0.396868	1.00246	0.591881	1.61122	1.51487	1.23825	0.596015	1.19937	0.753589	1.03835	0.345825	1.19303	1.6375	0.523824	0.759202	1.10112	0.849645	0.999224	0.580938	0.835373	0.464108	0.874597	1.24646		1.17997	0.59094	1.34169	0.793329	1.48702	0.734863	1.0907	2.26086	0.907433	0.473907	0.859221	1.44467	0.982096	1.84172	2.3741	1.03097
UNSA-00074	D1_Good	4.14633	0.867223	13.4129	1.5121	1.60265	0.240235	6.36449	0.961041	1.09545	1.36548	0.708887	40.2232	0.957973	5.53829	6.86016	3.03242	4.40615	0.718348	1.69945	0.988464	1.51191	0.500835	5.71889	3.16839	0.857154	1.31456	0.275307	1.09009	4.15841	1.58722	0.887641	1.55401	5.86466	3.08527	2.39809	0.723229		10.2706	0.85757	2.96107	0.897465	1.12301	44.0818	0.774957	1.00603	0.264409	0.823224	1.11624
UNSA-00079	D1_Good	0.422767	2.0428	0.81452	0.684357	0.726855	0.59593	1.24474	2.45247	2.51662	1.27848	1.0109	1	0.874601	1.01989	1.0222	1.03526	1.3907	1.55405	1.01229	1.01154	1.03404	1.03448	0.939889	1.19807	1.05564	1.20032	1.22838	1.40583	0.556652	1.23183	1.02882	1.93863	1.34685	0.613375	1.61607	0.946498	0.834087	0.590918	0.915881	0.778919	1.03351	2.26527	1.47731	1.38393	1.01119	0.591026	0.77915	1.10749
UNSA-00080	D1_Good	2.97263	0.773749	0.510319	0.920509	0.735228	3.94826	1.87182	0.430068	0.367776	0.964893	2.69771	0.809975	0.804665	0.559161	0.698009	0.588004	0.303798	1.58234	0.613143	0.82202	1.15241	0.344421	0.563843	0.628875	0.685841	0.604235	1.16929	0.57004	11.2324	0.796757	0.78068	0.352266	0.944237	2.1433	1.1161	0.527102	4.14898	0.152186	0.699948	0.803843	0.941724	0.679411	1.02589	2.50005	0.553492	1.42025	0.440443	0.803275
UNSA-00087	D1_Good	0.134154	0.0766633	2.06462	0.0933302	0.283819		0.458454	0.357148	0.123596	0.0121628	0.285284	0.557205	0.0464344	0.0617282	0.217884	0.257566	0.304174			0.0196132	0.0751072	0.0716217	1.44997	0.15991		0.164238	0.479377	0.187249	0.083578	0.0628887	1.44948		0.676035	0.518777	0.0943288	0.204075	0.0315018	0.12377		0.387503	0.0775811		0.31086	0.0900275	0.127085	0.0390668	1.29803	0.210332
UNSA-00093	D1_Good	0.747928	0.436413	0.825421		0.795551	4.88417	0.4263	0.535253	2.51049	1.0885	0.763552	0.353724	0.645302	0.695887	0.547194	0.94604	0.512841	1.25651	0.397281	1.51286	0.927419	1.17206	0.354756	0.899011	0.871294	0.587275	1.55548	0.521858	38.9125	1.04077	1.28123	1.29082	1.00011	1.02667	1.26953	0.480162	1.17545	0.381884	0.996842	0.875517	0.44859	0.381502	0.271936	0.733735	0.567996	1.23882	0.284155	1.16559
UNSA-00094	D1_Good		1.24341	0.777042	0.548941	0.569457	0.704805	0.142084	0.668834	1.42332	1.93703	1.49432	0.409231	1.13094	0.638768	0.906381	0.669069	0.678406	1.17246	0.683769	1.98946	1.25534	3.75303	0.210397	1.149	1.41724	0.888658	1.71737	1.27098	4.20651	1.448	2.00318	1.51951	0.730623	0.592923	0.620943	4.56687	0.839364	2.3414	1.74351	2.68604	0.430616	1.4788	0.733943	0.81882	1.29722	4.63167	0.588508	0.935954
UNSA-00097	D1_Good	0.864039	1.33876	1.82746	1.58078	0.87837	0.888494	0.481882	0.706693	0.617051	4.54274	1.39946	0.529727	0.437229	1.49142	1.12411	0.9129	0.60661	1.064	0.676537	1.98966	1.79189	0.518799	1.09186	1.26839	0.951184	1.08075	0.817191	1.08089	0.572513	1.03761	1.25424		0.949474	0.759571	1.10801	0.539228	0.493531	1.02686	0.508893	16.9583	1.46707	0.450151	1.29692	1.26731	1.21189	0.294269	2.54177	1.35528
UNSA-00098	D1_Good	1.11566	0.88657	2.2454	3.24777	2.20608	2.58175	3.92202	0.723665	0.785345	1.34582	1.54566	8.08454	1.30318	2.57802	4.83129	1.82382	2.37925	0.817633	1.61353	1.18484	0.822355	0.78752	3.23231	1.61368	1.68642	1.35375	1.52329	1.4381	17.2139	1.09882	1.25191	1.65139	2.01181	0.580238	2.41086	0.644821		2.86377	0.778061	0.870077	0.747698	0.753763	1.01128	1.11867	0.639063	0.0955692		1.53303
UNSA-00104	D1_Good	0.562419	0.634515	13.4943	1.8789	1.51511	10.1904	22.3301	0.86533	0.913009	0.97991	1.61747	10.5357	13.31	3.79313	2.69973	3.24422	3.52202	0.943937	4.52361	0.705156	1.20981	0.822309	2.17182	3.23219	4.9424	1.7485	1.54557	1.11042	5.51213	1.5446	0.514285	0.49222	3.01384	4.25862	0.840628	1.54528		2.71819	1.22966	0.926498	0.830181		2.64808	0.796755	0.811144	0.279864	0.423635	1.28973
UNSA-00106	D1_Good	1.22658	1	0.529621	0.652125	0.555389	1.3485	0.334697	1.68507	3.35781	0.548812	0.855662	0.322841	0.468888	0.315981	0.799031	0.787095		1.10124	0.284693	0.661232	0.441342	0.815274	0.169078	0.672839	0.747089	1.05133	1.95257	1.0118	0.91655	0.716502	0.922102	1.20577	0.477022	0.770707	0.486987	1.03122	1.74216	0.219337	0.753405	1.06649	1.86283	0.728334	0.778084	0.914088	0.825274	0.244007	1.00851	0.699776
UNSA-00109	D1_Good	0.329541	0.939914	0.372946	0.436468	1.33364	1.99537	0.481746	0.198439	0.730556	0.783969	1.1794	0.515342	0.70195	0.449603	2.28749	1.04888	0.877377	0.963055	1.08898	1.04665	0.850177	0.926192	0.492261	0.6857	2.5029	0.74443	2.87767	0.919252	0.943253	0.878981	0.916808	0.877112	0.968904	1.36661	1.03082	0.759296	3.06756	0.249309	0.859221	0.492076	1.05748	1.36058	13.1457	1.3837	0.88637	1.22181	0.44055	0.923077
UNSA-00001	D1_Poor	1.01506	2.18393	0.913253	1.45898	2.07377	0.699945	1.35801	2.92948	0.976309	2.43926	4.76323	1.54253	1.84759	1.90848	0.887549	0.95663	1.63242	1.37781	1.30248	3.19038	1.61922	0.544274	1.31836	1.01647	0.762454		0.945099	1.18369	6.45279	1.76004	1.16284	2.52442	1.1159	1.27098	1.94719	0.805767	0.302403	1.05066	0.960096	2.47701	1.02873	1.36567	156.243	1.42687	1.17809	0.655065	0.393992	1.45522
UNSA-00005	D1_Poor		0.0494437	0.0452825	0.128608	0.0712264	0.112315			0.0245404	0.0243393	0.326818					0.0435405		0.708343		0.0246028	0.024433	0.0412939		0.0687219		0.0888238		0.0765189	0.878528	0.0840542	2.5678		0.0768362		0.0441484		0.152847			0.313127	0.0455915		0.0244936	0.0795361	0.0740591	0.0464077	0.697841	0.0761821
UNSA-00006	D1_Poor	0.601401	0.472598	0.282284	0.454139	0.296435	0.401753	0.455952	0.273888	0.882934	0.895471	0.725212	0.252113	0.082752	0.196763	0.21525	0.324034		0.98316		0.847108	0.784857	1.15093	0.0579311	0.51551	0.451105	0.501261	0.923696	0.446102	1.73598	0.765498	2.55373	0.702709	0.420814	0.282305	0.228339	1.16517	0.408347	0.1808	0.754347	0.448721	0.485678	0.731191	0.380174	0.656958	0.472902	0.18724	1.52199	0.735836
UNSA-00008	D1_Poor	4.99858	3.04135	2.697	1.06281	0.980914	12.1009	10.324	3.1256	0.879831	1.95542	3.0221	7.64632	1.4817	1.2209	1.61771	1.6663	2.33446	1.00266	3.74759	2.58062	0.747752	0.572865	3.81964	2.21378	0.456254	0.810074	5.92272	1.25937	0.339283	1.29598	0.899371	1.84247	1.8931	0.710672	1.37928	1.39115	3.958	0.951306	1.14454	1.23162	2.59141	0.519362	8.16514	0.914368	0.634099	9.50512	0.225556	1.4094
UNSA-00011	D1_Poor	0.082969	0.160599	0.05259	0.0714959	0.118575	0.29255			0.195254	0.0862312	0.382492	0.0589262		0.0123477	0.069334	0.070172				0.0326572	0.083296	0.170611	0.0392865	0.145878		0.119332	0.0536476	0.105188	0.08574	0.137075	3.80123		0.0906949		0.0826343	0.806337	0.153849		0.516938	0.610332	0.102091		0.0657509	0.155356	0.131554	0.159453	1.99479	0.149984
UNSA-00012	D1_Poor	1.66154	2.22569	0.544881	1.13767	1.10758		0.247627		1.9124	3.81316	1.88873	0.37184	0.347666	1.30349	0.378784	0.55432	0.295016	0.679635		2.40449	1.23873	1.32991	0.995765	0.774199	0.883842		0.30671	0.803727	4.61099	1.0251	1.00451	0.249288	0.557287	0.351408	0.89071	1.88638	0.810574	1.01155	1.39002	8.18591	0.982331	1.53505	0.977114	0.721329	1.14885	0.299115	0.452902	1.29406
UNSA-00017	D1_Poor	6.86128	0.167506	14.477	1.71761	5.6528	0.680057	17.4355	1.79464	1.46011	1.13466	1.19409	35.4248	6.99147	2.79186	6.86155	1.54474	4.22564	0.595772	2.60047	0.861762	0.956821	0.761983	1.75794	2.65086		1.34076	0.283467	0.987384	4.67948	1.0307	1.01344	0.212804	4.53564	2.22329	0.922975	1.35889	0.116232	1.39969	0.744396	1.80448	0.631031		9.80886	1.03813	1.14202	1.07729	1.53684	0.969562
UNSA-00019	D1_Poor	0.471202	0.654426	0.283026	0.338655	0.275227	0.270633	0.51618	0.487784	0.235378	0.257527	0.749898	0.331585	0.156169	0.117783	0.157809	0.334067		0.88206	1.19225	0.0974301	0.14413	0.425073	0.370361	0.194876	0.67753	0.244274	0.290048	0.285384	0.0907434	0.259997	0.854291	0.659552	0.320658	0.885156	0.0922051	0.504441		0.357479		0.865971	0.446041		0.162576	0.203198	0.238904	0.316693	2.24566	0.276277
UNSA-00025	D1_Poor	1	2.41861	1.43263	1.75789	1	2.73712	1.03097	0.870913	1.50623	1.28701	2.11202	3.48342	3.69591	2.17203	0.988052	0.946155		1.22067	0.706425	1.16032	2.05319	2.0829	0.529393	1.18914	1.43014	1.0863	1.09177	0.913432	1.73987	1.86227	0.812633	0.209679	0.861736	0.158527	1.52053	1.87951	3.54299	1.12627	1.75701	1.72938	1.35761	1.40014	1.51355	3.37741	1.16053	2.26986	0.520246	1.18795
UNSA-00029	D1_Poor	2.16735	1.60991	0.322743	1.07953	1.1172	10.4291	1.2033	1.20114	0.75192	0.786904	0.789612	0.800503	1.15841	0.417943	1.34684	0.804129	1.3293	0.986283	0.634795	0.65425	1.26186	0.860559	0.906327	0.983528	0.939844	0.730137	0.728814	4.74278	0.743401	0.869896	1.05796	2.08912	0.839222	1.64937	0.999786	0.67547	6.4836	0.972709	0.790616	0.994239	1.50453	2.28549	1.11436	0.973638	1.07096	5.95108	1.27198	0.985054
UNSA-00033	D1_Poor	0.164828	0.153796	0.0899448	0.320344	0.340741		0.29481		0.088483	0.010014	0.307339	0.414577		0.010681		0.081557		0.694738		0.0141367	0.0490157	0.0586447	0.849208	0.0977969		0.102421	0.0456501	0.220452	0.446044	0.0833386	1.34186		0.144961		0.0519102		0.0783746			0.201655	0.244693		0.147627	0.713698	0.123077	0.156324	0.703752	0.169032
UNSA-00035	D1_Poor	1.9779	1.01135	3.06623	0.973559	2.48909	0.194443	0.705433	0.547787	1.89077	1.042	0.573048	3.28867	0.538278	3.04817	0.763307	1.33692	2.9869	0.888623	1.7435	1.58197	1.38954	0.837439	3.4027	1.98513	1.37054	0.820035	0.476227	3.603	1.91346	1.33352	1.11194		1.93216	0.934535	2.15324	0.445472	0.810152	1.72361		0.989638	1.23106	1.01848	1.50526	1.45781	1.04559	0.0567055	0.888831	1.97091
UNSA-00042	D1_Poor	1.53067	0.918355	2.27959		1.37787	0.35599	1.4867	1.34592	1.17661	1.61814	2.40667	0.472107	1.02001	1.11305	1.04443	1.46246	1.17365	0.944543	0.872569	1.22748	1.15836	0.816521	0.985507	1.62149	0.529205	0.778572	1.32476	0.0840242	18.7	1.00554	1.40675	1.83178	1.16924	0.36749	0.653891	1.03412	0.434528	1.0185	0.740484	1.40716	0.74946	0.571046	0.642234	1.04231	1.35178	0.344629	1.2045	1.28981
UNSA-00045	D1_Poor	1.32444	1.81024	4.54906	2.03851	2.26004	1.41869	6.40424	1.58741	2.55368	1.08844	1.24583	3.20668	2.48331	2.36925	0.750996	2.15459	2.41897	1.12817	2.19115	1.24793	1.49559	1.19917		1.9928	1.07284	1.51948	1.50073	3.00654	0.501769	1.15708	1.17381	1.2029	1.58853	1.7357	2.12069	1.65692	1.15803	1.4865	1.11393	1.03209	1.75643	4.47843	4.32702	0.963856	2.65704	1	2.09349	1.18559
UNSA-00047	D1_Poor	0.279499	0.640364	0.329097	0.892632	0.714565	0.254033	0.177435	0.523562	0.981632	2.00214	0.816885	0.271944	0.60171	0.35039	0.579583	0.706385		0.942886		2.23983	0.751644	1.153	0.696471	0.640308	0.660991	0.726625	1.40351	1	4.86884	1.0712	0.827003	0.868445	0.709851	0.472622	1.06424	1	0.71737	0.0944488	0.832393	3.63964	0.677124	0.849874	0.600929	1.08259	0.739083	2.95388	0.501182	1.18756
UNSA-00051	D1_Poor	0.803926	1.08801	0.355981	1.22058	0.783838	2.70125	0.615132	1.50228	1.34993	0.461015	0.54863	0.91637	0.460794	0.485222	0.758828	0.72616	0.658548	0.83092	0.531371	0.443013	0.888273	0.999357	0.99575	0.730779	1.80219	1.02617	1.07737	0.36938	0.192079	0.812297	0.642257	1.24555	0.736388	1.57701	1.04032	1.20149	2.05811	0.547345	0.947729	1.16733	1.0036	1.42339	0.942687	0.673809	2.26431	0.323277	1.09837	0.93679
UNSA-00053	D1_Poor	1.48055	1.3364	11.0924	5.47102	3.0634	30.4133	21.9956	0.532199	2.78503	1.24039	0.766115	25.3166	2.0705	1.79948	5.3779	3.04418	6.41992	0.876611	8.78732	1.66637	1.13314	2.99462	7.06619	2.71051	4.59293	1.50138	0.550815	3.92031	0.764573	1.73695	1.14934	0.644538	3.14052	8.23859	0.743765	2.5943		4.94116	2.4638	5.31034	1.40875	2.82491	9.22032	0.979569	0.840608	52.5223	0.214592	0.873177
UNSA-00057	D1_Poor	3.2347	0.784124	5.34759	2.82376	0.875849	32.4861	5.66696	0.946893	1.09572	2.93936	1.32195	16.1226	1.30975	1.15893	1.39225	2.20266	1.08558	1.01015	1.40651	1.74127	1.65718	1.98231	2.32198	1.01779	1.41209	0.98468	2.7964	1.00597	0.89288	2.02798	1.00163	1.29204	1.17065	4.73913	0.776649	2.06632		1.74614	1.49355	6.28469	1.13686	1.96497	2.07073	0.779772	0.85049	8.35249	0.318563	1.4173
UNSA-00061	D1_Poor	0.708603	0.201788	0.68431	1.23967	0.399888		0.1734	0.375527	0.911249	0.246527	0.48386	0.829306	0.352992	0.225384	0.297803	0.414504	0.902199	26.7578	0.284758	0.123598	0.48652	0.171512	0.352213	0.292202		0.38481	0.0841145	0.255359	11.7966	0.269462	1.8201	0.430993	0.497337	0.419454	0.16439	0.321001	0.0439001	0.219717		0.592937	0.376794		0.233629	0.602064	0.365449	0.0188891	0.206739	0.466647
UNSA-00062	D1_Poor	1.45317	1.90345	0.62046	1.38459	1.38142	1.5834	1.61987	1.02541	2.66992	1.80208	0.92661	1.22037	0.66906	0.977365	1.20754	1.28163	1.03106	0.917396	0.98771	2.32526	1.11213	1.55118	1.13145	0.955191	2.24423	0.904239	0.43031	1.54099	3.09883	1.25873	1.4916	1.19762	1.34352	1.31516	1.43821	1.34361	8.15825	0.516642	1.61183	0.732307	1.68498	2.70503	1.5152	1.564	1.28951	0.966331	0.384898	1.29758
UNSA-00066	D1_Poor	0.100671	0.0695633	0.0949204	0.196218	0.0866315	0.436175		0.516869	0.485377	0.034893	0.415904	0.02601	0.0258233	0.0128841	0.050387	0.0857627				0.0370652	0.0577414	0.346443	0.0575731	0.192561	1.58933	0.169659	0.853405	0.156653	0.816516	0.120951	2.44758		0.120423		0.028377	0.712405	0.061778		0.4483	0.46573	0.0683795		0.0519397	0.160788	0.117241	5.28754	0.53424	0.133469
UNSA-00069	D1_Poor	1.05405	0.730784	0.454013	0.621259	0.474061	1.3969	0.219405	0.388197	1.28682	1.06853	1.32157	0.584983	0.237358	0.252308	1.0048	0.666495		1.17762	0.232446	1.0817	1.05515	1.00064	0.518831	0.245886	0.852164	0.658968	0.405424	0.534622	0.859098	1.16221	1.71622		0.785392	1.8926	1.28521	0.370799	2.29543	0.0824182		0.537193	0.748649		1.15916	1.08193	0.563598	1.03079	1.70699	0.97511
UNSA-00071	D1_Poor	1.47336	0.909882	0.488176	1.28328	0.268864	1.77432	1.7089	0.788316	0.28856	0.126155	0.620696	2.1344	1.11088	0.229665	0.875353	0.434089		0.91507	0.502876	0.0958288	0.623503	0.512287	0.158247	1.28921	0.949488	0.779447	0.805361	0.638127	2.34893	0.278679	0.72486	1.04556	0.654481	0.102328	0.769749	0.701616	2.87154	0.865232	0.653628	0.48683	0.86441	0.557393	0.253079	2.74182	0.583174	7.772	4.07209	1.05239
UNSA-00075	D1_Poor	0.331057	0.720629	3.29358	1.51532	0.837943		5.36781	0.703797	1.12855	2.48403	0.975265	4.5191	3.49833	3.11118	0.995201	1.73262	0.713641	1.05982	0.877623	1.43122	1.42733	1.18093	3.05938	1.4476	0.89571	1.19159	0.608166	0.769519	2.89008	1.25308	0.569028	0.163703	1.60421	1.59222	1.1532	1.35885	1.43084	1.3266	1.42334	4.8546	0.923412	0.87021	0.934298	1.01161	0.810323	1.29858	0.149528	1.10753
UNSA-00078	D1_Poor	2.06167	0.895152	1.06567	0.994664	0.83019		4.51809	0.863524	0.597319	0.669041	1.55115	2.10868	0.617755	0.317872	1.15524	1.01331	1.74864	1.18214	1.05618	0.249913	0.408422	1.03103	0.731963	2.26	0.964304	1.01742	2.19998	1.05614	0.979186	0.500345	0.674748	0.410929	0.708221	0.692098	0.748479	1.80126		3.18522	1.28906	0.529962	1	0.430436	0.326856	3.72459	1.2583	11.5494	3.65304	0.837587
UNSA-00081	D1_Poor	0.394	0.388349	1.90097		1.4368	1.84076	0.566477	0.944463	1.37498	2.65535	1.53644	1.31398	1.01674	1	0.485299	1.55786	0.788089	1.17685	1.33729	3.60577	1.09747	1.62996	1.4739	2.22618	0.605067	0.80657	0.82745	0.99816	66.7151	1.71318	0.944007	0.936185	1.14748	0.878916	0.59782	2.32595	2.88801	0.545137	1.92029	2.26979	0.761433	0.556891	0.485133	0.977832	1.00752	6.10617	1.64805	0.666925
UNSA-00084	D1_Poor	0.455907	0.791139	7.38658	3.19665	2.76081	0.402736	1.69688	1.31254	1.12915	2.81843	4.05572	8.64336	1.36643	2.45384	4.70696	2.20276	3.21555	1.28274	3.28061	1.05179	0.611106	0.327271	3.28037	1.93444	0.88314	1.25724	3.4934	1.08498	14.2801	1.1685	0.990583		3.11984	2.31803	1.76543	0.723483	0.324772	3.33922	0.829856	1.34878	0.837155		6.09537	1.49291	1.29516	3.96107	0.226128	1.3672
UNSA-00088	D1_Poor	0.793265	2.82996	7.94546	2.86494	3.69075	0.540064	19.4451	0.674017	1.11657	0.77327	1.32774	27.1353	1.97198	3.00604	1.72085	3.01474	3.31566	1.01311	3.22458	0.567907	1.46096	1.14004	5.67774	1.6053	3.32329	1.44922	0.372852	1.53551	1.49377	2.07305	1.46512	1.45857	3.17259	3.99122	1.80654	2.31883	0.445301	2.26359	2.07715	0.793942	2.01691	1.09423	10.4803	3.68071	1.46092	0.567042	0.765253	0.915827
UNSA-00089	D1_Poor	4.18296	0.738306	1.23842	3.25061	1.08044	0.179499	1.33896	1.30757	0.221844	2.27808	2.15773	0.590687	3.30926	1.75546	1.03124	1.38513	0.928527	1.22248	0.714027	1.33298	2.48655	1.21537	1.36508	1.79523	2.50142	1.28918	0.667016	1.32306	19.2204	1.86688	1.33372		1.26889	2.15473	1.00021	0.841685	0.704566	1.4288	0.986924	1.55729	1.40911	1.398	0.446988	1.07783	1.87487	1.75022	1.81176	1.47639
UNSA-00092	D1_Poor	2.29669	2.42981	3.81275	1.51066	1.30835	4.64288	1.11633	2.02007	3.41119	1.59078	1.10223	8.22971	3.75681	2.36269	1.64307	1.90606		1.17772	8.82918	2.00496	1.94259	5.00226	3.08613	1.49156	1.28436	2.01334	1.29564	1.51038	0.271222	1.97749	1.39313	1.27823	2.70268	3.09209	0.360704	6.99733		2.28789	3.09843	1.40782	1.64598	4.46201	3.23207	0.830332	1.57639	1.02496	0.408822	1.06041
UNSA-00099	D1_Poor	0.354346	1.47782	0.904766	0.94701	0.98018	14.9426	1.23886	1.25079	1.53196	0.792236	2.53401	2.42542	1.14619	1.01483	2.44483	1.74326	0.675287	1.11931	1.52073	0.719929	0.619291	1.11664	0.818126	1.47553	1.83844	1.49764	3.34748	1.95416	0.429779	1.11746	1.06339	0.956056	1.40082	1.14389	1.30243	1.18976		0.321564	1.3492	0.916385	2.04177	2.07971	1	3.25749	0.683419	2.05227	0.602337	1.46768
UNSA-00100	D1_Poor	0.477543	2.12995	3.77246	2.88433	1.814	0.84295	3.79352	1.29586	0.985588	0.965965	1.35149	8.53635	1.50293	1.27325	2.15179	1.90346	1.22492	1.31648	3.05795	0.642075	0.813443	1.01235	1.06368	3.04496	3.30785	1.33148	1.22034	1.04039	1.15853	0.71186	1.17852	1.25153	1.42197	9.14983	0.813076	1.70385	0.841118	7.028	1.21531	0.503187	2.97873	0.913334	1.82488	9.84581	0.567594	6.8574	0.80595	0.992314
UNSA-00101	D1_Poor	1.70785	0.83889	1.36736	1.78676	1.17203	2.83665	3.60408	1.81766	0.973218	0.840805	0.652538	0.558919	1.15347	1.73619	0.976117	1.52269	0.950947	1.42258	0.918179	1.33506	0.931917	0.909765	0.743451	0.789236	1.02204	1.00078	3.0573	1.17003	5.7521	1.10022	0.985069	1.03475	1.46942	1.15014	1.52215	0.671322	4.7132	0.189607		1.50293	0.890597	0.301316	0.774664	1.21968	1.1335	5.11318	0.513977	1.14202
UNSA-00105	D1_Poor	0.915695	1.63493	6.86045	2.23512	2.4353		4.2443	1.6256	0.750446	0.315649	0.581038	15.177	2.59411	4.64724	1.83701	2.94673	3.51745	0.998933	3.319	0.292935	1.57129	0.648077	2.05719	3.66599	2.17027	3.11122	0.516811	1.0217	0.779296	0.994942	0.650926	1.13059	2.96226	4.73045	2.28068	2.06964	1.50247	4.60554	1.36548	0.476983	1.46705		2.78319	1.02504	0.897015	0.112162	0.831675	1.05449
UNSA-00110	D1_Poor	0.406848	0.569871	0.26944	1.09388	0.586642	2.15827	2.26733	0.592427	0.473406	0.345749	0.777344	0.629945	0.630094	0.294535	3.71523	0.857242	0.798161	1.09608	1.0515	0.55594	0.807129	1.10414	1.01508	0.979712	1.0641	1.09736	1.45964	0.829601	0.434587	0.839636	0.814312	0.977175	0.828784	0.815834	1.20103	1.15881	11.6834	0.410928	1.18037	0.349554	0.750411	0.735316	0.754415	3.60507	0.721042	0.705929	0.50383	0.899745
UNSA-00003	D5_Good	5.9253	1.70099	1.29	1.9193	0.895196	1.53603	0.744128	2.05528	0.80477	1.00899	1.29454	7.45813	1.28757	1.22746	0.892565	1.24121	1.261	0.649397	1.93756	0.909027	1.01074	0.915771	1.47883	1.64856	0.757277	0.752836	2.62198	0.738448	2.74933	1.27091	1.22932	1.43168	1.26386		1.87349	1.56969		2.56808	1.10965	0.745469	1.58479	0.801107	0.548637	0.622405	1.03868	4.61444	1.46412	0.770551
UNSA-00021	D5_Good	1.45434	1.14877	0.763271	0.674424	1.30634	0.738927	0.627196	1.10178	0.798516	0.225338	0.551274	4.77265	0.887215	1.91967	1.44026	1.48043	1.89904	1.01913	1.47741	0.396221	0.801621	0.559561	1.58989	1.4571	0.961828	0.844482	0.602885	0.855635	0.172259	0.709201	0.745318	0.799433	1.77129	0.486507	0.788231	0.522871		2.54625	0.812535	0.67506	1.39756		2.0194	2.59829	1.02446	2.50512	0.783468	0.884073
UNSA-00031	D5_Good	0.521881	1	0.738665	0.823237	0.764668	7.31077	1.32647	0.526474	0.577476	0.731606	0.675123	0.621655	0.378388	0.882312	0.481954	0.620509		0.890025	0.155917	0.975777	1.58796	0.587215	0.129186	0.88583	1.16417	0.257833	1.03162	0.106958	2.57205	1.40783	1.64845	0.518156	0.756036	0.406193	0.99193	0.55306	2.6817	0.692831	0.740395	1.16286	1.23206	0.557429	0.645042	0.972844	1.57198	1.97201	1.90811	1.3295
UNSA-00037	D5_Good	1.69893	2.25848	1.42309	2.1609	1.57829	1.27775	1.82619	2.75891	5.11051	2.63262	2.33959	1.44684	1.53889	3.31557	1.93528	1.50187	1.99851	1.19148	1.38413	3.9915	1.93449	1.87827	1.25968	1.61603	0.363014	1.63481	1.23	10.4109	1.78795	1.9658	0.901499	0.205116	2.06389	0.362064	2.27221	1.5088	0.305143	1.43292	1.28819	1.90785	3.38664	2.22493	1.23377	8.99648	1.73127	1.22261	1.15859	1.1287
UNSA-00049	D5_Good	0.317483	0.32992	1.12104	0.598424	0.349993	0.139014	0.515526	0.198516	0.462613	0.125568	0.337239	1.22852	0.145451	0.384998	0.487521	0.39577	0.491872	0.837229	0.177024	0.144039	0.269062	0.559556	11.2459	1.67958	0.731483	0.484108	0.0442712	1.03979	0.063413	0.272801	0.621899		0.42745	0.274858	0.316266	0.67593	0.119227	0.403059		0.346349	0.413749		9.6033	0.257811	0.405647	0.122238	1.89119	0.662027
UNSA-00054	D5_Good	1.76275	1.59078	0.519772	1.02644	1	1.8267	0.656287	1.17969	1.18213	1.88011	1.08389	0.526567	0.399402	1.14348	0.624283	0.680753	0.605606	1.022		2.47115	1.29325	2.3887	0.336718	0.782821	1.64109	1.17666	2.03787	0.376107	2.40195	1.10978	0.821834	0.764629	0.686276	0.98303	1.49924	2.3094	1.21015	0.578605	1.33983	1.1758	1.15907	0.835372	0.674261	2.26353	1.35736	3.42137	1.51421	1.02192
UNSA-00059	D5_Good	1.67588	2.07367	9.55684	0.667091	2.35052	0.713296	4.14349	1.4184	1.02654	0.607416	0.570998	6.71911	0.646658	0.917966	0.794991	1.06769	1.54657	3.54755	0.475456	0.456526	0.303976	0.0790339	1.89436	0.747743		0.984649	0.505192	1.12498	2.05899	0.447813	0.667054		1.18792	1.01298	0.471727	0.722015	0.343626	0.988451	0.673796	0.307532	1.44688		0.782739	1.40019	0.807624	0.663976	0.785592	0.445209
UNSA-00064	D5_Good	4.44648	1.20839	1.40752	3.76002	1.67178	1.02765	0.256314	1.74454	5.34097	3.95224	2.58515	0.879254	1.93893	3.85045	0.495367	1.25859	1.54951	1.60688	0.616267	2.28054	1.6593	3.91993	0.825162	2.14008	1.74397	1.65744	1.49814	1.39046	4.1841	1.48262	1.10437	1.42644	1.45576	1.85131	2.08699	2.85806	7.39599	2.19092	1.77366	1.02875	1.39996	2.43213	2.02867	1.34175	2.04931	0.401542	1.40484	1.63233
UNSA-00095	D5_Good	0.351889	0.922799	0.56083	0.991611	1.16835	0.962046	0.356164	1.01844	1.45654	0.630302	0.800085	0.602189	1.30125	0.94661	0.469032	1.02577	0.608563	1.20719	0.323745	1.45892	1.45388	2.60327	0.476603	0.681657	2.36921	1.43231	0.33943	1.01718	0.385381	1.00191	1.48759	1.35513	0.755097	1.22591	0.912961	3.72754		0.472655	1.67992	2.4079	1.25407	0.962101	0.514158	0.864356	1.01078	2.67045	0.435309	0.920767
UNSA-00107	D5_Good	0.701929	1.27539	1.02576	0.911802	0.887619	3.70771	0.734574	2.66555	2.54897	2.44828	1.96234	0.654533	1.00397	0.784616	0.555075	1.04452	0.708336	1.15258	0.870346	1.48974	1.19081	2.27244	0.253216	0.788511	0.431942	1.14853	3.95828	1.25875	5.90072	0.998091	1.11378	1.47686	0.813015	1.47377	1.06592	2.52861		0.459839	1.54764	2.19415	2.86373	2.79554	1.22535	0.860527	1.23318	1.91227	0.981538	0.99742
UNSA-00191	D5_Good	1.67282	1.0349	19.1868		25.2612	2.61665	9.26108	0.687376	0.196877	1.92827	0.97613	10.7201	0.732253	2.17031	1.67056	3.42443	5.444	0.549358	3.14459	1.50892	0.829022	0.730285	3.27897	0.923931	0.96096	1.18704	0.321661	1.39781	8.05929	1.0682	5.74019	0.359771	2.91158	3.59584	0.486702	0.356751	0.323157	2.57861	0.484379	0.626969	1.24122	0.892167	10.1567	1.3884	1.23891	1.16765	1.01302	0.735035
UNSA-00194	D5_Good	0.935713	1.51905	0.948999	0.52779	1.1892	0.388206	0.326931	1.61265	2.16329	1.80507	0.956126	1.25164	0.918798	1.33878	1.74781	1.18866	1.24349	1.26598	1.32233	1.81877	1.23657	1.78023	0.334559	1.19586	1.156	1.1389	0.763093	1.83114	1.02893	1.58246	1.95712	2.06389	1.34012	0.854684	1.01523	2.635	1.78347	0.850539	2.31138	1.55804	1.83426	2.41688	1.52081	1.01165	1.21257	0.215349	1.19817	1.08909
UNSA-00195	D5_Good	2.81629	1.26817	2.95796		1.67989	2.31495	3.63875	1.15555	1.12899	1.32935	1.58253	13.2118	1.51407	2.39714	1.75628	1.68543	2.27347	1.11292	1.75047	1.10422	0.960799	1.34553	2.66051	1.62953	0.611555	1.0439	1.23122	1.2057	8.33504	1.27253	1.5061	0.971481	1.7126	1.00265	0.62655	1.63919	0.978766	4.44816	1.52413	0.397567	0.987401	0.774098	1.09761	1.2757	1.00331	1.83581	1.40589	0.948427
UNSA-00197	D5_Good	0.460168	0.802339	0.954961	0.981184	0.468376	1.63136	0.115941	0.812603	2.01585	0.923676	0.682216	0.194074	0.760306	1.19983	0.87179	0.694908	0.604183	1.29061	0.518471	1.14778	1.46253	2.08687	0.395931	0.662781	0.482901	1.08199	0.316853	0.606947	0.887982	1.35139	2.52971		0.927042	0.870853	0.622946	1.223	0.69696	0.487923	1.49795	1.23116	0.736492	1.2655	0.711884	0.936506	1.21457	0.823297	2.38374	1.30892
UNSA-00198	D5_Good	0.888245	1.0749	1.57786	0.881643	0.96032	0.476671	0.380207	1.35886	1.29233	0.714501	0.623993	2.34543	1.84024	1.90023	0.709568	1.09823	1.2611	1.24683	1.47922	0.73557	1.02281	1.52804	0.763462	1.11573	0.593546	1.30081	0.22868	0.757616	0.350897	1.00382	1.50636	0.114787	0.799078	0.357719	2.69431	0.708853	0.73096	0.466082	0.837618	1.33294	0.979078	1.08927	0.800633	0.68928	1.11992	0.368765	0.679911	0.8879
UNSA-00199	D5_Good	2.87398	0.790387	1.17082		1.43152	1.6338	0.291956	1.1445	1.71545	1.42336	1.69709	1.67062	1.29423	1.62212	0.893518	1.34338	1.03039	1.5466	1.55585	1.84632	1.58725	2.82614	0.590044	1.13864	0.991734	1.68226	0.479422	0.846916	8.77905	1.27276	2.419	1.06133	0.866612	0.670643	0.530426	6.9198	1.06175	1.43531	2.10522	1.25809	0.909627	0.827913	0.666325	0.772214	1.43052	0.963936	2.19426	1.44414
UNSA-00229	D5_Good	2.52089	0.938261	1.22661	0.631895	0.800102	5.72252	0.535372	0.814507	0.555213	1.74288	1.23541	0.365447	1.13641	1.24768	0.753703	0.914864	0.501744	1.06916	0.805231	0.826897	1.63722	0.857936	0.614176	0.582479	1.52114	1.4347	0.714294	1.12938	0.443262	1.08211	1.04251	0.901272	0.94938	1.74596	0.337978	0.269695	1.70508	0.643805	0.944722	2.55221	1.20423	0.526521	1.02517	1.1952	1.56744	1.25909	1.51391	1.28474
UNSA-00230	D5_Good	0.523204	1.13805	1.44838	1.83776	1.29271	0.771085	2.52098	1.40347	1.04743	2.05487	3.12428	0.78482	0.573374	0.90369	0.668878	1.29344	0.760797	1.18935	1.29228	1.51514	1.27893	1.04882	1.70112	1.04588	1.16584	0.740045	1.5417	1.10648	1.31651	1.59033	1.50418		1.0234	1.02209	3.00424	0.552247	8.40294	0.805033	1.22256	1.0056	1.57629	1.23405	1.80316	1.45291	0.973386	0.542385	1.74026	0.881391
UNSA-00233	D5_Good	1.16584	0.656653	5.22734	1.924	5.45362	0.301337	4.67989	1.24568	1.10107	1.8959	1.85361	7.14962	1.41855	2.63629	1.70352	2.10008	3.7124	0.627892	0.845224	0.836243	1.31709	0.486198	2.82351	0.531473	0.532587	0.986184	7.58187	0.941188	10.3365	0.969154	3.25963	0.532292	2.59965	3.12389	3.01406	1.23196	0.228248	1.73996	1.95703	1.1166	1.16668	0.596338	8.02426	1.17411	1.25994	0.161272	0.633537	1.09652
UNSA-00235	D5_Good	1.67317	0.434401	23.7252	0.826904	2.58379	2.91009	2.18469	2.12223	0.312279	1.25579	0.856709	29.1302	5.31951	2.11673	0.717554	3.1906	7.24702	1.23317	1.96431	0.725163	0.90564	0.405249	3.47699	2.09249	0.713421	0.913168	0.57513	1.69669	1.26012	1.81223	1.60909	0.240078	2.80754	2.37066	3.11643	0.352578		3.31582	1.02452	3.37446	0.855362	0.337004	6.58877	1.02334	0.995074	2.63932	1.0076	0.557103
UNSA-00236	D5_Good	1.34047	0.506336	1.95528		1.68743	0.571032	0.935217	0.996589	1.24677	1.03751	1.01325	1.59704	0.920329	1.18112	0.922979	1.805	0.71978	1.26349	1.15363	1.56088	1.3073	1.49318	0.915537	1.29117	0.732772	0.780963	0.544968	0.490327	73.9573	1.53123	2.41046	1.74048	1.0638	1.54626	0.459785	1.70841	0.730961	0.706233	1.32465	1.21409	0.608527	0.790719	0.436807	1.02229	1.55063	0.4929	4.55018	1.09762
UNSA-00237	D5_Good	1.53933	1.57186	3.31749		0.935381	8.417	0.12041	1.26934	0.94659	1.99433	0.834398	2.08349	0.818997	1.80395	1.04076	1.35389	1.34664	1.26937	1.3545	1.74392	1.63758	1.23528	0.582908	0.979447	1.96045	1.15394	1.34019	1.18512	3.65637	1.67971	2.51191	0.466378	1.60043	0.923684	0.821556	1.07165	1.02788	0.818419	1.57173	1.24834	0.961049	0.854218	0.905337	0.739451	1.04427	1.67751	3.37074	1.22934
UNSA-00267	D5_Good	0.663462	2.34726	0.688716	1.0526	0.559424	1.24613	3.82517	1.64257	1.76283	0.770434	0.499827	0.415805	1.72109	0.74455	0.0782444	0.965566	0.92994	0.830969	0.390183	0.737273	0.906177	2.26079	2.95767	0.638952	1.86174	1.78871	0.0461637	0.974706	0.532399	1.24525	0.627075	3.98523	0.876773	0.114788	0.912334	1.62162	6.72264	0.83336	0.959705	0.632305	0.945971	2.84737	4.00789	3.35833	1.34207	0.273741	1.86912	1.02407
UNSA-00009	D5_Poor	24.6981	2.04837	7.51876	1.20015	1.65752	9.92421	6.35601	2.2686	1.15004	1.16642	1.39905	21.4351	3.14858	2.34938	3.19334	2.20132	5.63971	1.1059	8.21302	1.61536	1.03604	1.44835	5.80824	3.07839	0.663428	0.810364	3.89558	1.47085	0.22281	1.46224	0.978744	1.1187	3.40382	0.902732	1.6421	2.89693		1.86571	1.36892	1.77076	1.28627	0.407291	3.67345	0.715147	0.9152	86.8114	0.387398	1.5313
UNSA-00013	D5_Poor	0.916415	1.52037	1.66981	0.654639	1.22846	1.6018	1.99648		2.10326	1.71489	0.884829	0.29083	0.337483	1.60671	0.607134	0.699111	0.594405	0.892319	0.410514	1.93745	1.57566	1.42789	1.02975	0.623533	1.14169	1.02602	0.395241	1.05866	0.460538	1.12201	1.33533		0.666143	0.907502	0.652895	1.41055	2.11946	1.19445	1.07671	5.08224	1.20061		1.31551	1.21621	1.79575	0.135136	1.30956	1.82495
UNSA-00026	D5_Poor	0.371606	1.89853	0.497951	0.336531	0.898951		0.891902	0.973892	2.24741	2.36198	3.02705	0.802127	0.426733	0.509213	0.574631	0.64536	0.712368	0.732081		1.64216	1.13779	3.07361	0.202559	0.485783	0.60359	1.39528	0.68356	0.988266	0.288105	1.82802	1.13521		0.615451	0.452507	1.13934	7.494	1.33859	0.285536	3.88246	2.12626	0.980705	1.89102	0.807142	1.12457	1.35231	0.133067	1.06064	0.963971
UNSA-00043	D5_Poor	0.423549	0.736591	1.05088	0.536397	1.06391		0.16501	1.23717	1.15721	1.2562	2.02317	1.31367	0.719193	0.818019	0.884531	1.06824	0.711938	1.10851	0.667023	1.25823	1.12362	1.23246	0.437666	0.920992	0.830871	1.09858	1.81209	3.49637	1	0.986032	1.33171	1.47325	1.03262	0.509342	0.905016	1.38099	0.263937	0.68649	1.00316	1.03242	1	1.33024	1	1.24961	1.31984	0.215333	1.17026	0.763265
UNSA-00072	D5_Poor	1.23034	0.85787	0.630158	1.56057	0.369814	1.2512	0.335585	1.49382	0.849277	0.279626	0.74586	1.79098	1.21166	0.418101	0.582486	0.581343		1.16328	0.40034	0.281011	0.566232	1.197	0.307373	1.14502	1.88478	0.722467	1.03587	0.603987	5.02327	0.348701	1.22014	1.32611	0.712321	0.113754	0.725553	1.11129	0.911222	0.647373	0.803526	0.413591	0.871998		0.200219	0.493715	0.762816	10.4296	3.72586	0.777142
UNSA-00076	D5_Poor	1.62562	0.770293	1.72228	0.626875	1.03096	0.86089		0.645124	1.0666	0.571366	0.721672	0.797332	0.570548	1.05132	0.764111	0.906878	0.575443	0.949481	1.13961	0.704769	0.899534	1.21358	1.46298	0.589322	0.909988	0.941109	0.621033	1.02789	0.507648	0.908834	0.774878	0.839831	0.919554	1	0.770899	1.59902		0.515648	0.926807	0.428626	0.636817	0.987746	1.44893	0.618878	0.991372	1.02383	1.75738	0.776415
UNSA-00082	D5_Poor	0.385096	0.0625777	0.4		0.201603	0.110593	0.133535	0.309705	0.218091	0.130343	0.415841	0.128557	0.0601659	0.0544213	0.103335	0.314959		0.908761		0.146651	0.187738	0.266566	0.288148	0.287801	0.342385	0.256139	0.0804185	0.114087	15.1142	0.187477	0.869887	0.360949	0.2678		0.183702	0.293399	0.127952			0.331066	0.074048		0.0517021	0.220969	0.245056	0.134566	5.17337	0.234284
UNSA-00085	D5_Poor	0.492901	0.884682	2.38441	1.38592	2.29407	0.233975	4.76874	1.64441	2.85766	0.537571	0.556685	7.09378	1.81001	3.50373	2.91568	1.89627	2.4107	1.09516	1.73706	0.895113	1.43839	1.17254	2.40948	2.01176	1.7258	1.10231	2.10308	1	0.833153	1.32492	0.998141	0.191322	2.11783	1.14598	1.54411	1.20428	0.182638	2.11711	1.27038	1.08318	0.899369	0.565008	2.78023	1.83136	1.67297	0.409631	0.222028	0.997605
UNSA-00090	D5_Poor	0.915353	1.26561	1.09907	1.19417	1.2433	0.872649	0.777275	2.10234	0.611522	0.306808	0.650255	0.683096	0.608915	1.71322	1.49152	1.20992	0.938473	1.28541	1.10844	0.708463	2.02429	1.06939	0.518822	1.15179	1.50377	0.954614	1.49047	1.40637	0.250519	1.37215	1.206	1.27797	1.01856	1.43235	0.9395	0.61622	1.14334	1.42199	0.716193	1.50947	1.33911	2.4826	1.04173	1.74097	1.43367	9.73261	0.856431	1.04531
UNSA-00102	D5_Poor	0.563504	0.884332	0.672518	0.214352	0.588296	0.847044		0.396741	0.917609	1.03889	0.946219	0.326825	0.512962	0.770573	0.657696	0.614945	0.897378	1.13021		0.785223	1.04465	1.07704	0.453128	0.309846	0.263659	1.06791	0.512375	1.33263	1.83797	0.856115	0.902385	0.550798	0.850852	0.669642	1.05236	0.640485		0.291365		0.83913	0.598361	1.06574	0.770414	0.69773	1.51173	0.731438	3.45705	1.07251
UNSA-00190	D5_Poor	1.2602	0.648501	0.310168	0.740447	0.927646	2.74423	0.918298	1.33223	2.19088	0.394411	0.572465	0.439562	1.21754	1.7165	0.647638	0.764921	0.650568	0.98566	0.958872	0.997262	1.33307	0.549259	0.391402	0.705381	0.786301	0.676462	1.23441	0.660391	2.45235	1.4462	1.28336	1.17759	0.828788	1.11459	2.63681	1.21796	0.632261	0.720517	0.672108	0.863253	0.656461	1.02191	1.9934	0.578972	0.845329	2.44905	0.304764	0.784531
UNSA-00192	D5_Poor	0.446715	0.603765	1.14626	0.704996	0.956503	0.519674	0.264354	1.57305	1.31664	1.47459	2.23465	0.879383	0.775633	0.934712	1.21683	1.18122	0.867016	1.3107	1.07717	1.32468	1.23895	1.29412	0.645844	1.08841	1.32674	1.36212	1.38653	0.93805	1.53994	1.18179	1.90655	1.81745	1.09054	0.497898	2.48642	1.4053	0.653075	0.535904	1.36946	1.55044	0.98844	0.941758	1.16312	0.881411	1.48279	0.210688	0.663263	0.734059
UNSA-00193	D5_Poor	1.3684	0.76078	0.742786	0.754144	1.91379	0.89526	0.704277	2.29605	0.860034	0.301807	0.489031	4.599	1.17896	2.07461	1.75155	1.99561	1.86816	1.38239	2.05607	0.436694	0.887074	0.685266	3.36349	1.97276	1.15318	0.781215	0.591451	1.08544	0.151763	0.767931	1.40758	0.921155	1.65453	1.03749	1.74255	0.78225	0.673834	1.92084	0.595821	0.853452	1.68749	0.358967	2.5219	3.64917	1.11204	2.6512	0.418256	0.701974
UNSA-00196	D5_Poor	1.86206	0.408852	9.29595	2.80086	1.51281	9.29418	1.89481	1.10536	0.404391	1.686	2.41717	8.85727	2.54333	1.74743	0.950189	2.11832	2.81266	0.910322	1.67346	0.727389	1.15337	1.2492	4.48103	1.22638	0.764932	1.21139	0.214091	0.624311	12.2303	1.34096	0.877766	0.134517	1.64788	1.55165	1.30907	0.726862		1.78983	0.420958	1.16652	0.657363	0.516706	3.5732	0.555894	0.961833	2.40064	0.310272	0.571194
UNSA-00231	D5_Poor	0.830344	4.16967	1.9039	1.14825	3.24253	2.29574	0.928066	0.92776	0.150975	0.882502	0.59357	14.0761	0.884166	1.82719	1.07628	1.16874	1.04751	1.83509	1.01849	1.2614	1.18385	1.50792	0.66314	1.06256	0.988855	1.22576	0.831572	2.02912	0.50724	1.48204	0.461255	1.82657	1.24307	0.764473	0.761016	1.04026	0.646384	3.96273	1.30471	0.654374	1.62567	3.20992	1.40974	2.6532	2.25411	15.7475	1.88737	0.975635
UNSA-00232	D5_Poor	0.357706	1.5138	1.0753		0.737317	1.93075	0.330487	1.21472	1.77096	1.85256	2.51765	1.42686	1.18664	0.607419	2.65559	0.956401	1.62156	1.68386	0.496668	1.51515	1.19946	4.17558	0.145235	0.972892	1.0191	1.33447	0.117945	0.912583	4.34397	1.67424	1.31206	1.70329	0.884902	0.308214	1.11119	4.89282	4.39432	0.396536			0.841871	3.29993	0.693916	1.26736	1.73836	0.55116	1.36363	1.47305
UNSA-00234	D5_Poor	2.38957	2.11116	2.26366	0.989129	2.39326	0.48209	20.6577	2.19957	0.805027	0.928413	1.33724	10.1299	2.11188	1.63412	2.04022	1.87718	4.12078	2.09067	4.33771	0.582412	1.29248	1.67512	1.73075	3.61548	0.572805	1.15154	3.21734	1.58005	0.342186	1.35799	0.666171	1.78282	1.44167	0.81344	0.914666	4.12023	1.79867	13.3917	1.97486	0.262795	1.69155	3.03721	0.969259	2.54543	1.94344	20.4292	2.08588	1.22142
UNSA-00004	Discharge_Good	1.93171	1.12378	0.550928	0.851211	1.71196	1.43073	1.05506	0.907721	1.21045	0.334137	0.535525	2.53592	0.385539	0.454258	0.686739	0.723979	0.690951	0.775096	0.478236	0.390656	0.46533	0.702121	0.529326	1.02668	0.431228	0.653378	1.51473	0.597618	0.243956	0.619744	1.74142	0.517661	0.703143	0.087269	1.2183	1.22342		1.05001	0.752707	0.852607	1.22125	0.536279	0.34707	0.531946	0.63867	19.731	2.20963	0.586419
UNSA-00022	Discharge_Good	1.45543	1.01777	0.580193	0.622947	1.24434	2.3114	0.493852	1.63053	0.77741	0.750283	1.45493	3.47168	0.876558	1.83156	1.47224	1.46706	1.5674	0.9173	1.13573	0.605637	1.09448	0.466557	1.18981	1.34501	0.987792	0.791165	1.02505	0.895015	0.278651	0.754961	0.461576	0.85884	1.4205	0.28172	0.88127	0.787516		1.39761	0.635387	1.35305	1.25737		1.58607	8.01854	1.14978	3.69043	1.04109	0.977441
UNSA-00032	Discharge_Good	0.335403	2.05543	0.612774	0.596678	0.962366	1.91815	0.191389	1.16794	2.1734	0.654611	1.10145	0.796144	0.875343	0.991808	1.07766	0.648928	0.968941	0.946518	0.4145	1.4245	1.40242	3.02633	0.435158	0.674319	0.781858	2.30659	0.962632	3.21138	0.170881	1.47317	1.66464	0.108786	0.810868	0.763878	1.1429	1.28981	2.30567	1.2534	0.599184	1.12069	1.69645	7.85693	0.966939	16.6802	3.17069	0.973083	1.83895	1.56318
UNSA-00038	Discharge_Good	5.40024	0.980898	1.3045	0.787034	10.01	4.78431	3.42089	0.870519	1.12852	0.360405	0.391933	1.05378	0.712018	1.80619	1.76508	0.994042	1.06061	0.733642	0.421479	1.25179	1.31164	0.844193	2.11152	0.707869	0.420607	2.44235	0.453619	8.89418	0.112161	0.9445	1.00705		1.35626	0.390384	1.38924	0.939531	4.71826	1.73352	0.715407	3.79088	2.7521	0.761235	1.00454	9.31221	1.06308	4.14161	1.08608	1.20722
UNSA-00050	Discharge_Good	0.750828	0.0547513	0.130549	0.153525	0.112623	0.22531			0.0881827	0.0165356	0.303398	0.366739		0.010802		0.0523287		1.11402		0.0123033	0.0292912	0.0875813	4.16143	0.196257		0.0706581		0.535867	0.0342631	0.120778	0.660518		0.0934271		0.0378769	0.398414	0.0508696			0.230174	0.0795036		1.13715	0.19623	0.0839223	0.0467796	0.954605	0.113116
UNSA-00055	Discharge_Good	0.253218	0.828608	0.369386	0.80119	0.632973	1.44748	0.541881	0.487691	0.62947	0.796374	0.645701	0.546073	0.264604	0.316608	0.358025	0.48447		0.862273		0.885497	0.776036	0.979618	0.491362	0.480969	2.46747	0.718503	0.990984	1.98923	0.617182	0.678497	0.80784	0.380216	0.43897	0.280798	0.900004	0.430097	1.12425	0.258035		1.63549	0.973361	0.5619	0.62447	0.602744	0.567223	6.91433	2.00345	0.564509
UNSA-00060	Discharge_Good	1.5169	2.39519	11.4967	1.49296	20.5896	39.9993	91.1164	1.77205	3.8825	3.61924	1.17318	5.99276	1.06226	2.60305	1.21384	2.55865	5.44501	0.66313	1.67299	4.76619	0.677665	1.75381	4.25775	0.864924	0.839627	4.28632	0.537947	1.68252	3.0521	0.828255	0.979003	0.302726	3.9233	2.41394	1.65119	0.727683		7.53309	0.728128	3.18203	2.08552	7.48328	7.82297	36.7622	1.67364	6.06349	0.88339	0.771032
UNSA-00065	Discharge_Good	1.36625	0.592345	0.716253	0.710353	0.719467	0.330437	0.221602	0.898657	1	0.66212	1.94183	0.40819	0.27313	0.661755	0.511709	0.523217	0.310823	1.09369		0.715698	1.06207	1.66529	1.12476	0.532846	1.00998	1.02318	1.03048	0.740171	0.484973	0.646943	1.22464	1.15934	0.758677	0.4352	1.28119	1.20606	2.116	0.583173	0.703283	0.718842	0.706789		0.905875	0.509659	1.1114	0.505404	3.79029	0.776225
UNSA-00096	Discharge_Good	0.135548	1.4999	0.80508	0.717316	0.449201	2.01693	0.269138	1	2.00411	3.09508	2.40095	0.371268	0.548821	0.652335	1.02022	0.71635	0.716257	1.39671		2.50275	0.747515	2.9351	0.30406	0.645615	0.653372	1.21781	1.16398	1.15745	1.40328	1.26701	0.98412	0.643761	0.765491	0.978058	1.16444	3.32259		0.559331	1.65421	0.778359	1.21015	2.90694	0.731341	1.40593	1.28292	0.431093	1.60426	1.00239
UNSA-00108	Discharge_Good	1.31105	0.790477	1.81866	0.496049	0.726558	2.7479	0.19614	1.30498	1.21444	0.964076	1.77378	0.79343	1	1.0103	0.378939	0.925043	0.749521	1.07741	0.917168	1.19304	1.62244	0.94882	0.750327	0.602368	1.10505	1.18465	1.60992	1.07396	0.58804	1.08289	0.842699	1.24528	1.2774	0.561849	2.08326	0.817941		0.273832	0.683813	1.35156	1.04103	0.475258	0.963193	0.974754	1.81483	5.01181	0.863948	1.1095
UNSA-00201	Discharge_Good	0.615534	4.70593	10.4996	0.737159	35.7316	1.37579	29.983	1.85681	0.707631	1.75845	9.53043	5.90111	1.02626	2.3992	2.44892	3.31039	4.58079	0.73049	2.49994	1.29177	0.913715	1.02113	4.34621	1.77866	1.08973	2.23664	0.42714	2.29225	0.392493	1.11864	1.90532		2.69759	1.92578	2.26099	1.26521	1.93516	7.56693	0.745237	0.587891	2.73571	0.793065	11.703	36.0259	1.57306	6.10223	1.42534	0.916331
UNSA-00205	Discharge_Good	1.15031	1.55355	2.31113	3.21601	3.41119	0.911462	0.210685	2.74066	1.77213	1.88154	1.92124	2.22541	0.937096	1.03793	1.72601	1.31231	0.916017	1.35541	1.24698	1.28014	1.26241	2.16319	0.661507	1.30972	0.791122	1.0028	1.21458	1.19696	9.82198	1.25474	1.94237	1.6287	1.17844	2.43411	3.30353	2.5126	0.918092	0.564458	2.27567	1.3068	1.69718	1.89435	1.41631	0.9395	1.08681	2.30302	0.509899	0.706198
UNSA-00207	Discharge_Good	1.22105	1.61198	4.10626	1.32686	1.30796	3.72084	3.55866	1.05804	0.766882	1.60175	0.871603	10.8378	1.35503	3.71585	1.13291	1.42834	1.85857	0.678243	2.72083	1.16926	1.0295	1.00806	5.42284	0.943682	0.592877	1.54578	0.328396	1.05481	2.31688	1.14819	1.9303		2.98238	1.90975	2.47528	1.19638	0.649948	8.7807	0.734528	0.957135	0.890379	1.11241	10.1575	0.798015	0.806356	6.61647	0.427962	0.468595
UNSA-00208	Discharge_Good	1.11125	1.48396	1.10238	0.500925	1.8247	0.629443	0.62157	1.40216	2.41321	1.1749	1.38912	1.4526	1.66472	1.17041	2.82607	1.10208	1.07982	1.35597	1.44409	1.27253	1.16675	2.04053	0.777419	1.22594	0.798638	1.06954	0.783849	2.0497	0.629314	1.27832	2.66309	2.09794	1.18913	1.10082	3.87564	2.03964	1.66452	0.351051	1.18432	1.2957	1.61946	3.59242	1.10573	0.839561	1.66912	1.30181	0.531093	1.02433
UNSA-00211	Discharge_Good	0.158102	1.98115	0.784139	0.547608	1.50399	1.79748	0.408681	0.595937	1.68572	1.01087	3.415	0.811013	0.964826	0.904057	0.941671	0.901731	1.09037	1.07133	0.572451	0.967164	1.04604	2.67082	0.498449	0.948098	0.792203	1.40102	1.00518	0.659223	44.8701	1.40246	1.12209	1.93984	1.03117	1.04134	2.63212	2.60298	0.871238	0.939134	1.26003	0.681924	0.644422	1.31986	0.537493	1.85348	1.31802	3.91495	0.944149	0.620261
UNSA-00213	Discharge_Good	3.87077	1.24018	1.47832		1.67943	6.81717	4.12869	1.2534	0.852926	1.47563	1.94566	6.17083	2.28728	1.70675	1.76384	1.1585	1.57145	0.906837	1.79593	1.18422	1.0603	1.18872	1.32734	1.15804	0.630257	0.818777	0.664992	1.31093	8.80835	1.18102	1.26225	0.986388	1.57527	0.781271	0.683449	1.26538	0.680744	2.68215	0.954227	0.658112	0.798333	1.54475	1.08953	0.554107	1.32086	3.71427	1.20097	1.0414
UNSA-00215	Discharge_Good	0.145097	1.73435	0.544287	0.546875	0.997518	3.83145	0.201292	0.486715	1.72056	1.8754	4.20538	0.0776018	0.328068	0.733225	0.920758	0.524985	0.412464	1.41432	0.605547	1.67472	1.15709	1.87438	0.414932	0.501697	0.844764	1.67321	0.297593	0.975816	0.210793	1.49883	1.7845		0.873875	0.863867	0.484468	2.40126	0.799947	0.729994	1.13854	1.48757	1.55873	1.48211	0.571537	6.81831	0.966739	13.5729	1.49337	1.04133
UNSA-00216	Discharge_Good	1.15627	0.937096	0.476775	0.422167	1.05046	0.629987	0.175271	1.15262	2.03658	0.222024	1.46767	0.723828	0.812726	1.07838	0.893419	0.662826	0.844157	1.00428	1.18821	0.270543	1.00293	0.800482	0.400568	0.796406	0.733026	2.41228	0.144391	0.81458	0.177767	0.939716	3.35364	0.0785973	0.77252	0.233982	3.62701	1.107	2.89836	0.422625		0.809225	0.898775	1.49136	0.776423	0.599792	1.27339	1.47653	1.08978	0.770873
UNSA-00218	Discharge_Good	0.50063	0.855139	0.274971	0.312333	1.16897	2.03373	0.173501	0.619736	1.49316	0.53694	0.589606	0.540918	1.03435	0.609506	0.875891	0.883724	0.667918	1.01656	1.23221	0.984164	1.11908	1.44832	0.16468	0.507145	0.384927	1.09216	2.08582	0.818942	0.213702	1.06206	1.05082	1.08045	0.974205	1.82503	0.548228	2.01979	2.02751	0.191234	1.63824		1.41195	0.980716	1.87724	0.777018	1.33423	4.30428	1.29835	1.2161
UNSA-00220	Discharge_Good	0.496469	1.80916	0.543572	1.29054	0.853822	0.626969	0.17568	0.977829	2.22189	2.59523	3.39651	0.782409	0.465725	1.53286	0.861693	0.792831	0.933209	1.2101	0.636908	1.09868	1.23286	2.07732	0.487162	0.767185	0.654809	1.07738	0.591198	1.1925	2.74446	1.40298	1.4374		0.815989	0.792544	4.32659	1.93478	1.27307	0.940815	1.4695	0.659546	2.13481	1.78653	2.23077	8.62244	1.66182	0.219012		1.06051
UNSA-00221	Discharge_Good	1.22027	0.908975	1.66463	1.37402	0.198575	0.431626	0.146154	2.20581	1.2382	0.818265	0.823833	1.21018	1.16658	0.776711	0.69279	0.73335	0.87219	12.5572	1.08351	0.506755	1.03049	0.190094	0.52559	0.63945	1.11274	1.54026	0.784921	0.227745	2.98739	1.88129	2.70684	1.6136	0.88993	1.83694	3.75823	2.69182	1.70665	0.387972	1.72182	0.86303	0.348695	1.31946	0.677207	0.159144	1.27567	1.79884	0.869915	0.995112
UNSA-00222	Discharge_Good	1.7283	0.57871	0.552733	1.26937	0.866923	0.803466	0.251515	0.6224	1.19932	1.05433	1.46698	0.677357	0.687894	0.827618	0.57151	0.926166	0.651313	1.26823	1.57314	1.03491	1.22111	1.68317	0.38038	0.843847	0.674396	0.853791	0.385995	0.698364	3.58887	0.968184	2.02444	0.893674	0.740114	1.46177	2.05653	4.45525	0.790263	0.784417	2.64155	1.06137	0.871962	0.773841	0.505084	0.659895	1.00554	0.387056	0.711932	0.971629
UNSA-00238	Discharge_Good	0.948075	1.7156	0.530112	0.77772	1.46069	0.467583	1.52282	1.1213	2.29112	1.43939	0.700633	0.582405	0.553028	1.07445	0.114183	0.840787	0.972789	1.73542	0.362744	1.281	0.922566	2.4095	0.753688	0.573003	1.50616	1.07237	0.13239	1.34731	0.270263	1.4074	1.49235	1.32385	0.866343	0.422412	5.16482	1.47057	2.26771	0.680046	1.43479	0.83781	1.61299	2.10005	1.75855	5.79264	1.49634	0.952241	1.00422	0.669061
UNSA-00241	Discharge_Good	2.80651	1.55091	3.91899	1.38949	1.81854	0.590314	1.82941	2.33562	1.00208	1.05587	1.03403	2.752	0.71954	4.18907	0.732558	1.25389	2.10761	9.25934	1.02719	0.687168	1.0875	0.0851445	5.52202	2.89753	2.17452	1.38264	2.30297	0.822849	0.779586	1.3338	2.70924		1.26799	0.708521	4.47726	1.61479	4.92155	1.63333	2.1697	0.73698	1.66161	0.336796	0.883496	5.53201	1.1895	0.987517	0.11878	0.98346
UNSA-00242	Discharge_Good	1.12174	1.11011	0.855875	0.439269	0.451988	0.704478	0.210687	0.695256	0.692045	0.818037	0.651215	0.18955	0.364111	0.890747	2.00891	0.623764	0.639719	9.51855		0.353374	1.18727	0.0813261		0.518783	0.933519	0.686154	1.41583	0.954745	0.409779	0.926414	1.83856	1.20703	0.880639	2.23333	1.85101	0.597141	2.89449	0.400699	0.817764	2.43965	1.20269	0.918129	0.539652	0.39464	1.37521	3.45316	0.7058	1.07258
UNSA-00244	Discharge_Good	1.01515	0.764737	1.4771	1.2082	1.06554	14.8527	2.69605	1.92325	1.59681	0.632375	1.69143	1.79545	0.982981	1.09661	1.50911	1.22879	0.946204	1.11557	1.56763	0.766203	1.06665	1.74167	1.18815	0.963771	0.700504	1.09564	1.50069	1.14822	0.275662	1.36578	1.32755	1.60574	1.04876	0.563242	2.59611	2.01046		0.293902	1.76562	1.0443	1.58204	1.28073	1.36998	1.21959	0.976813	8.05209	0.611703	0.575769
UNSA-00246	Discharge_Good	1.11306	0.739519	5.4868		5.52289	0.489515	13.1361	1.34929	1.13771	2.26284	2.54824	9.8374	1.58771	2.21443	1.11512	2.12665	3.14324	0.72219	0.623286	1.22001	1.28669	0.558461	1.2302	0.559411		1.23856	10.8022	1.10077	27.1506	1.1378	2.48849	0.96399	2.88352	3.93968	0.509689	0.435449	0.26819	1.54488	1.19577	1.38063	0.941655	0.730132	9.03297		1.35431	0.267634	1.57948	1.02154
UNSA-00248	Discharge_Good	0.489388	2.61557	1.1909	0.906712	1.20151	3.45759	3.00647	1.20478	1.35427	1.97036	1.51264	0.635617	0.550503	1.76454	0.885763	1.10905	0.556975	1.45583	0.913859	1.31948	1.24242	1.32097	0.878913	1.39682	1.43545	2.03814	0.401054	2.3909	0.407275	1.51839	0.876137		1.00787	2.03187	4.34241	2.43111	2.89383	1.36417	2.19401	1.73235	3.70687	2.42621	1.42882	5.17252	1.39081	1.26435	0.749908	1.32396
UNSA-00252	Discharge_Good	1.46954	1.17581	7.32702	0.46886	1.44025	1.03619	0.313719	1.66158	3.38203	0.960407	0.989859	7.6623	1.98592	0.580225	2.25746	0.9719	2.46657	1.74031	1.02898	0.714657	0.446851	1.56781	0.887332	0.565754	0.525051	1.29674	0.327324	1.0835	0.807238	1.65701	1.37489	0.948292	2.1004	1.10008	0.29807	0.720072		0.277511	1.15112	2.09872	1.30106	1.61422	1.38694	0.714596	1.39662	3.41257	0.975934	0.597134
UNSA-00253	Discharge_Good	0.689433	0.72701	0.35466	1.12572	0.591376	0.914429	0.361883	0.729001	1.98837	1.12342	0.699121	0.593283	0.328936	0.582812	0.676998	0.626103	0.731681	1.22126	0.677659	1.3487	0.983699	1.84846	1.322	0.717252	1.23478	1.2206	0.0938072	0.635754	2.14729	1.3411	2.14101	1.49342	0.883414	1.08451	2.1114	2.06474	1.38541	0.378795	1.19602	1.28597	1.11662	1.38818	1.06177	1.10183	1.35277	1.53504	1.11646	0.685444
UNSA-00255	Discharge_Good	0.952549	0.834151	0.577396		0.550413	2.62921	0.898969	1.07011	2.19491	1.33373	1.68994	0.371538	0.769819	0.706073	0.842839	0.887823	0.789474	1.48052	0.478028	1.44009	1.33534	1.50027		0.752736	0.824119	1.62887		0.851421	6.30992	1.94339	3.93279	2.08097	0.911907	1.1184	0.438806	1.09247	0.943874	0.201925	1.45792	0.795459	0.786713	2.52606	1.36257	1.5653	0.986486	0.0881395	4.06425	1.23385
UNSA-00256	Discharge_Good	0.305484	2.51319	2.35504	1.64816	0.913568	0.753861	1.23938	1.13174	2.34981	2.06875	2.3934	3.43023	1.16464	1.43468	3.21537	1.48898	0.257896	1.10832	0.394655	1.365	0.566004	3.41653	3.13135	1.25311	0.857033	1.44404	0.59022	1.10626	1.90114	0.990734	1.3407		1.15117	1.6003	2.82448	9.66537	0.54298	1.04879	5.0416	1.16319	2.90121	2.99194	1.47138	3.61049	2.06283	0.321991	0.402585	1.36037
UNSA-00257	Discharge_Good	1.93529	1.29391	2.62421	1.15662	0.925999	2.50294	0.303684	2.63314	1.31864	1.96419	2.52463	1.00433	0.992389	1.65105	1.21223	1.04899	1.1343	1.12627	0.961817	1.30777	1.57115	1.82631	0.747706	1.04769	1.12269	1.91629	0.698684	1.46025	0.95254	1.68301	2.7421	0.824864	1.44416	0.885537	3.68527	2.17892	0.907789	1.30846	1.66758	0.62045	1.12859	0.903087	1.12704	1.20577	1.36653	8.81413	2.22249	1.26441
UNSA-00259	Discharge_Good	1.63185	1.38959	1.0053	0.927621	1.13022	0.67435	0.091829	2.77379	0.715967	1.70108	1.29696	1.5169	0.865002	0.81743	0.913941	0.829736	0.608961	1.326	0.716853	1.04501	1.59709	1.81337	0.839699	0.929785	0.821126	1.33438	1.45804	1.1964	2.55167	0.802623	1.15062	1.02373	1.13308	2.06084	3.61287	2.9519	0.818699	0.350402		0.549583	0.615358	1.41287	0.93388	2.60502	1.86338	0.263486	2.31753	0.905398
UNSA-00260	Discharge_Good	1.83985	0.862341	2.05818	1.06968	0.643727	0.91632	1.59996	0.701341	1.21281	1.25542	1.04091	0.484845	0.399433	1.62643	1.15508	0.925356	1.09885	17.9892	1.10893	0.655486	0.994759	0.167262	0.869051	1.49299	1.70832	0.610365	3.0404	0.39573	0.519938	1.39484	3.18625	1.90835	1.10112	2.15654	4.15811	1.23759	2.26676	1.19749	1.30448	2.45867	0.516004	1.83043	0.341811	0.436296	1.02151	0.405175	0.756036	1.30391
UNSA-00010	Discharge_Poor	2.21711	0.125538	0.838011	0.142925	0.220966	34.2223	1.01162	0.266461	0.213971	0.056864	0.448974	0.885038	0.0757147	0.0335277	0.27884	0.165421	0.48042		0.267656	0.0694475	0.0624572	0.197189	0.923379	0.300079		0.996486	0.243762	0.252263	0.143306	0.117487	0.926543	0.124211	0.758822		0.100157	1.19568			0.7303	0.371977	0.176655		0.198385	0.509017	0.136361	15.095	1.14249	0.308641
UNSA-00014	Discharge_Poor	0.253062	1.02641	0.469295	0.400304	1.02972	1.20873	0.24491	0.959142	1.3366	1.12932	9.93574	0.384878	0.322811	0.272045	0.31205	0.554331	0.32819	1.08216		1.86382	0.573154	1.17586	0.152789	0.335563	1	0.765507	1.29375	0.502347	0.899627	1.1497	1.96167	0.499361	0.426018	0.241435	0.805928	0.810743		0.245453	0.570749	1.0819	0.600465	1	0.774509	0.473519	0.560431	0.183379	0.846583	0.787244
UNSA-00027	Discharge_Poor	0.279734	0.0466068	0.0472953	0.0378133	0.0812048				0.291487	0.0586381	0.488719	0.0704833		0.00581131		0.0686862		0.481129		0.0239756	0.0700664	0.131411		0.071445		0.127423		0.0663157	0.308462	0.130291	0.979654		0.0837995		0.0659212	0.614747				0.315308	0.0493845		0.0222523		0.103281		0.907986	0.109823
UNSA-00044	Discharge_Poor	0.91196	1.76067	1.34244	1.3783	1.4006	0.311647	0.362565	1.36987	2.66305	0.784245	1.06148	1.28497	1.49092	1.02267	1.25061	1.54882	1.06617	0.972008	1.85968	0.934365	1.80056	3.26762	0.637923	1.11301	1.22949	1.80241	2.23212	4.61729	0.77181	1.40869	1.3907	1.38198	1.08797	1.38238	0.939061	3.7735		0.49774	2.12495	0.923663	1.32782	2.04871	1.22674	1.51435	1.68094	2.36676	0.817159	1.0555
UNSA-00073	Discharge_Poor	0.422463	0.0635587	0.0632618	0.0937949	0.0859339	2.48382		0.457522	0.0386814	0.00493051	0.297349	0.0807846	0.0979011	0.00956381	0.104315	0.0746302				0.0104659	0.0455611	0.0895554	0.0306473	0.228436		0.171747	0.0586424	0.121896	0.0310344	0.0545965	0.771216	0.101605	0.158555		0.0727932	0.294303		0.0399008		0.370824	0.0764922		0.0225745	0.13506	0.120022	1.93645	2.65125	0.179217
UNSA-00077	Discharge_Poor	0.523381	1.11532	0.489205	0.427058	1.38705	0.960279	0.311236	0.729522	1.69453	2.3312	1.38784	0.373952	1.09875	0.752038	0.69152	0.633581	0.634622	1.17274	0.23826	1.87248	1.17552	2.30203	1.26206	0.629716	0.757146	1.4317	0.66047	1.35039	2.18527	0.75048	0.761753	0.608127	1.04652	0.418949	1.1129	2.32458		0.706721	1.33392	1.05109	1.28495	1.65065	1.1696	0.843645	1.18149	0.489088	1.17481	0.850861
UNSA-00083	Discharge_Poor	0.139987	0.0517739	0.0453201	0.0972136	0.08636	0.161658			0.123289	0.0583801	0.345439			0.00659674		0.0629048		0.761363		0.0607248	0.0427188	0.197454	0.208157	0.0841258	0.990685	0.117656	0.0492236	0.0918864	0.3411	0.103893	0.80686	0.169937	0.122794		0.0703466	0.287306	0.190933			0.670855	0.0622959		0.0453669	0.0755053	0.120796	0.233242	1.66504	0.113848
UNSA-00086	Discharge_Poor	1.45614	1.13385	9.50639	1.80114	2.73244	0.611897	11.2342	1.20064	0.314129	1.10718	1.12955	10.9507	1.26382	1.27597	1.30727	1.40402	2.49985	0.676576	0.461238	0.708701	0.595725	0.304999	0.93581	0.897935	0.965994	0.770973	0.218922	1.20823	11.2574	0.490211	1.00829		3.02155	5.3486	0.389293	0.643015		0.637341		1.08118	1.25426		3.10121	1.07222	0.747463	0.734647	1.01407	0.460674
UNSA-00091	Discharge_Poor	0.82985	1.47159	1.94428	2.28092	1.96581	0.675257	0.60884	1.72069	1.89859	2.61094	2.79129	1.35326	2.023	1.70357	1.05479	1.33255	1.03882	1.66146	0.978099	2.22756	2.12661	2.50872	0.365078	0.861281	1.1215	1.28993	2.36157	1.50351	7.18955	1.49163	0.890079	2.19085	1.28992	1.08687	1.42132	2.5254	1.38012	0.59202	1.45709	5.50348	1.32879	4.88382	1.15249	1.12208	1.48602	3.77419	1.0258	1.42404
UNSA-00103	Discharge_Poor		0.0399169	0.0873297	0.0863636	0.0820136	0.192052				0.0281942	0.382763	0.0152253		0.00827978		0.0530865		0.798101		0.0270261	0.0475924	0.0790403	0.146876	0.040361	0.35978	0.173551	0.036489	0.0989581	0.0822325	0.0698155	0.810426		0.125152		0.0829313					0.21827	0.0564948		0.0726029	0.0913532	0.0704676	0.533754	1.427	0.102578
UNSA-00200	Discharge_Poor	0.84427	1.03748	0.581254		1.40251	0.911294	1.09192	1.409	1.89364	1.3727	2.52258	1.2847	1.42042	0.943924	0.726111	0.927015	0.554642	1.22649	0.825091	2.19257	1.33031	1.12891	0.177071	0.623846	1.38212	1.04825	2.30387	0.695125	4.67424	1.95949	1.91805	2.71045	0.77022	0.960299	0.666311	1.99265	0.519391	0.659987	0.835213	4.39037	1.24529	1.02741	1.04741	0.983897	1.26082	0.804247	2.03457	0.928135
UNSA-00202	Discharge_Poor	0.874952	0.667675	1.19497	0.958379	1.01386	0.76412	0.252637	1.44064	1.93471	0.841354	0.894672	0.908781	0.865417	0.93796	1.51143	1.39435	1.04408	1.36817	0.894776	0.977811	1.31829	2.79579	0.784678	1.03992	1.3617	1.06333	1.61722	0.951649	0.941829	1.38436	2.92729	1.4189	1.02634	0.545288	2.30341	2.67607	0.774923	0.35573	2.06141	1.83338	1.25287	1.45155	1.17415	1.34215	1.6892	2.028	1.26169	0.841046
UNSA-00203	Discharge_Poor	1.57417	0.543702	0.58491	0.655522	1.46227	2.12988	0.665603	2.56058	0.809303	0.767925	1.54847	2.68133	1.12008	1.81016	1.87593	1.73855	1.63472	1.55256	1.6597	0.529722	1.11903	0.663216	2.60838	1.70175	1.30105	0.955091	0.951499	1.06412	0.268044	0.83687	0.766888	1.16391	1.49202	0.739633	2.07127	0.685147	1.08517	1.01265	0.931239	0.782573	1.26896	0.421126	1.77736	9.93214	1.34142	3.94295	0.556941	0.868395
UNSA-00204	Discharge_Poor	1.21307	2.12283	1.06076	0.0558588	1.77301	0.984775	0.577968	2.99182	0.893337	1.13786	1.9733	1.72136	1.16379	0.75432	1.10939	1.02933	1.24823	1.10547	0.79262	1.1244	1.65803	1.86074	0.18951	0.836316	1.17314	1.3058	0.180511	1.65559	2.35331	1.0811	0.758051	2.54546	1.14907	0.505166	0.628069	0.98653	4.79928	1.3856		1.19483	1.28462	10.72	1.38575	4.85172	1.99304	3.83127	3.98965	1.2984
UNSA-00206	Discharge_Poor	0.526596	0.845465	2.12169	1.00428	1.22689	0.74056	0.171004	2.0752	1.75668	1.28093	1.54475	1.95051	1.60933	1.29119	0.776349	1.02026	1.22882	1.54643	1.62313	2.11843	1.49497	1.52329	0.287556	1.21082	0.789764	1.53929	3.69706	0.920594	1.69658	1.41899	1.42095	1.68725	1.1889	1.40711	1.50994	1.4754	0.737276	0.837608	1.77358	2.39027	1.15061	1.83784	2.50596	0.53091	1.48385	0.663585	1.80105	1.42129
UNSA-00209	Discharge_Poor	0.972647	0.372847	0.781939	0.433591	0.544521	1.23515	0.734091	0.862184	1.17937	0.165262	0.204725	0.454916	0.575925	0.585958	0.700527	0.725867	0.462354	1.0142	0.689672	0.380424	0.9363	0.975148	0.231089	0.573299	0.742662	0.95782	0.320738	0.487883	0.170389	0.737008	1.26678	1.09301	0.847754	0.370832	0.139443	1.35642	1.82907	0.370836	0.662134	0.680419	0.836734	0.987656	0.899369	1.16231	1.7412	3.40163	2.88562	1.41968
UNSA-00210	Discharge_Poor	0.892957	0.532277	2.59251	0.470444	1.1856	0.43231	0.21273	1.12509	1.92297	0.952547	0.771748	1.1265	0.489917	1.98269	1.14961	1.04818	1.93938	19.1452	1.63263	0.641523	1.04844	0.12322	4.21611	1.50936	1.27104	0.546147	0.444555	0.420662	2.87831	1.35272	1.83522	0.288644	1.68353	1.928	4.9342	1.39168	1.35438	0.76702	1.69908	0.598768	0.500018	0.762627	1.76031	0.286932	1.10273	0.0539244	0.929682	1.01068
UNSA-00212	Discharge_Poor	0.411286	1.31251	0.939575	1.22708	0.731547	4.7356	0.167712	0.899744	0.915185	1.13862	1.55755	0.203329	0.48457	0.450158	0.886805	0.809091	0.677962	1.39458	0.62498	1.34474	1.14997	1.59476	0.351322	0.776378	0.538089	0.437837	0.406807	1.20407	5.45601	1.5612	2.30221	0.330686	1.04752	1.23285	4.86253	1.40699	5.29413	0.413575	0.670305	1.80168	1.6289	1.28977	0.898086	1.40701	2.06064	2.69289	3.54229	1.03782
UNSA-00214	Discharge_Poor	1.2794	0.402159	11.0469		1.01953	4.84759	1.20175	2.06561	0.750813	1.31187	1.71928	9.04009	1.83412	0.980483	1.56924	1.33412	2.23588	1.07359	1.50083	0.732781	0.954857	1.88306	1.76669	0.761159	0.378035	0.751342	0.459626	0.55267	10.1507	1.08488	1.04282	0.488562	1.24753	1.13029	0.267268	1.66727		0.930423	1.71564	1.12213	0.644744	0.527135	2.64828	0.521898	0.853729	1.06773	1.3838	0.617412
UNSA-00217	Discharge_Poor	0.677926	0.639514	0.951304		0.810572	1.17681	0.184633	1.17303	0.836093	0.466256	0.979118	1.08175	0.382289	1.19666	0.982923	0.886411	0.880101	20.6863	1.09387	0.442383	0.674674	0.21861		0.409859	0.538318	0.619494	0.745529	0.365802	2.23804	0.822976	3.11674	1.44636	0.9309	1.43499	0.520685	1.78005	0.509598	0.761811	1.57796	0.375904	0.4656	1.80414	0.837689	0.0383014	0.580379	0.187275	0.217456	0.741625
UNSA-00219	Discharge_Poor	0.541265	1.06192	0.705441	0.561455	0.574481	1.28833	0.384656	0.931537	1.39402	1.9012	1.46567	0.407503	0.331306	0.578541	0.600152	0.642028	0.43736	1.13058	1.02873	1.7728	1.69079	1.51418	0.405285	0.879613	0.706871	1.9196	0.0539658	0.970802	0.258421	1.22624	1.14972		0.785809	0.172499	0.271265	1.13723	2.5352	0.740581	1.5093	1.07752	0.715535	7.12645	0.899938	2.16397	1.08331	1.46844	3.55742	1.40992
UNSA-00223	Discharge_Poor	0.349092	2.21316	0.57413	0.259336	0.227382	18.2537	2.8193	1.90295	2.76996	1.74417	9.4384	0.166349	0.351887	1.17932	0.797493	0.606804		192.416		0.392396	0.25487	0.744696	0.209353	0.695591	0.309252	1.21908	0.22113	0.681228	0.224094	1.02473	2.73833	3.09282	0.931252	45.9908	0.162386	5.39069			3.75346	0.51871	1.82396	2.54417	0.223718	0.295661	1.40587	7.68505	0.797977	1.62416
UNSA-00239	Discharge_Poor	1.03929	0.841329	2.50399	0.472417	0.718347	3.0348	1.0166	2.70847	0.910653	0.99736	1.0151	1.97111	1.48357	1.17208	1.33298	1.3023	1.55424	26.4411	2.93462	0.825181	0.594571	0.343087	0.862415	0.436491	1.77353	1.34961	0.623644	0.42183	0.212908	1.23471	3.51514	2.05251	1.36217	0.324483	0.884477	5.00201		1.25467	3.28872	1.37476	0.919742	1.82724	1.1974	0.122838	1.00182	20.9226	0.523188	1.05457
UNSA-00240	Discharge_Poor	0.586761	5.92795	1.41251	1.16267	1.9273	6.11399	0.541423	1.44266	1.00046	0.550396	0.575505	5.82245	0.642631	1.4234	1.10972	0.794878	0.623816	1.62945	0.956268	0.920832	1.22551	2.22815	0.252768	0.778616	1.18378	0.609666	1.57576	1.90827	0.524697	1.29876	0.39734	0.769799	1.04824	1.16221	4.10632	4.2663	0.479568	1.42028	2.27327	0.554195	1.76703	3.35282	0.812011	1.33589	1.9245	6.81543	0.752808	0.626226
UNSA-00243	Discharge_Poor	0.258175	0.988973	0.894722	1.38802	0.75759	1.15854	0.433698	2.4208	2.00699	0.636236	0.773096	0.804129	0.68071	0.50462	0.445499	0.832847	0.790184	0.964746	0.477307	0.446465	0.78405	1.68171	0.799527	0.915345	1.44017	1.36057	0.646981	0.901915	1.97577	0.651974	1.16795	1.96441	0.720499	1.04156	0.518592	1.97779	1.26948	0.612748	1.33246	0.321762	1.20668	2.5684	1.28098	0.840625	1.23768	0.366281	0.749431	1.16621
UNSA-00245	Discharge_Poor	0.285811	0.955896	0.523673	1.0638	0.538882	1.35538	0.438658	0.84949	1.11734	1.46538	1.77762	0.677786	0.69654	0.388745	2.16374	0.654115	1.17679	1.2998	0.839488	0.905469	1.11234	2.81737	0.24638	0.834128	0.548927	1.04868	0.490094	0.678764	1.68363	1.1549	0.991856	1.19781	0.777595	0.57358	1.01919	5.15725	5.22794	0.359219	3.08598		0.623723	1.51298	0.579116	1.17484	1.12529	0.58087	1.29193	1.12913
UNSA-00247	Discharge_Poor	1.45637	1.16476	0.71542	2.41007	1.31534	0.806523	0.407998	1.78291	1.57744	2.18487	0.861382	0.781203	0.724769	1.03942	0.82816	1.05834	0.908937	1.29074	1.59817	1.78456	1.129	1.87986	1.67282	1.03023	1.99716	0.967775	0.209197	1.49386	8.83585	1.39856	1.17749	2.16243	1.23779	2.4753	3.20072	1.92713	1.97326	0.371508	1.98877	0.839551	1.42969	1.79816	1.32938	1.68551	1.29991	2.27703	0.434829	0.926778
UNSA-00249	Discharge_Poor	0.943417	0.526931	3.33182	0.528929	0.639094	1.52591	0.168239	4.19597	1.12573	0.714061	1.11021	1.6608	0.900163	1.2581	0.995951	1.3635	0.942474	7.22954	1.84427	0.389984	0.768392	0.25801	0.972471	0.767023	1.18847	1.32189	1.27725	0.431669	0.416009	1.23263	5.16014	2.60053	1.02908	2.06661	0.779547	0.814236	0.879614	0.80215	0.878858	0.439184	0.389904	1.4106	1.36487		1.39834	1.25506	0.830016	1.4094
UNSA-00250	Discharge_Poor	0.697584	1.28681	1.02718	0.87348	1.46623	0.918604	0.556833	1.63135	1.46808	0.834106	0.463702	1.38187	0.781607	1.2376	1.02131	1.18847	1.64275	1.23863	0.79681	1.0719	1.16163	1.60926	0.36826	0.719686	0.687162	1.29489	0.524401	0.964084	0.285213	1.46683	1.61981	1.28763	1.21374	0.413332	1.00059	2.51854	1.99469	1.88607	1.69895	0.578261	0.836605	2.3698	1.50786		1.56436	5.47179	1.51193	1.77766
UNSA-00251	Discharge_Poor	2.55345	1.22425	1.41533	0.703731	1.78827	3.20503	10.5794	6.38901	1.63756	0.570781	0.690821	6.93056	3.11346	1.07773	3.09627	1.4382	1.41094	1.82354	1.54492	0.585846	1.02331	2.83567	1.30058	2.45858	0.239981	1.00068	2.10514	1.6107	0.193367	1.18284	0.798804	1.68434	1.04049	0.909602	2.00028	4.49588	1.17726	1.02001	2.4233	0.769994	2.00117	2.84327	1.37869	2.92504	1.47979	13.4842	0.8327	0.725541
UNSA-00254	Discharge_Poor	2.82559	0.802267	1.00825	0.945009	0.732362	2.43164	0.652921	1.88002	0.462562	0.827098	0.55227	0.541864	0.712181	1.04044	1.33973	0.906247	0.53353	6.1466	1.69773	0.757245	0.989429	0.0868147	2.27922	0.739868	1.56588	0.893673	2.5919	0.738257	0.788639	1.13458	2.01796	1.8592	0.924428	4.23581	0.706677	0.663094	5.87508	0.758492	0.356208	0.676954	1.25846	0.957595	0.486444	3.1873	2.19949	4.79142	0.949493	1.79979
UNSA-00258	Discharge_Poor	0.941178	0.680043	0.62204	0.183251	0.314042	8.5226	0.777281	6.01372	1.65343	1.18782	1.63269	1.2026	0.975311	1.16255	2.15539	0.799452	1.71671	35.7943	2.85111	0.468136	0.539182	0.197946	2.27191	0.718049	0.438563	0.569258	6.32726	0.675294	0.233021	1.27541	3.59702	0.747401	0.914469	1.44745	2.36781	2.853	0.438458	0.432975	1.79029	1.06956	0.543371	0.749339	0.435594	0.960157	0.813667	24.3897	0.515464	0.224854
UNSA-00261	Discharge_Poor	0.221032	0.83125	0.618693	0.829614	0.694298	5.46817	1.48208	2.86686	1.34065	0.344111	0.820179	1.06736	0.989285	1.13143	0.959966	1.13478	0.647602	1.22574	1.05429	0.762436	1.31182	0.923803	0.948196	0.951257	1.05143	1.06225	1.66281	0.929523	0.233623	1.47927	2.29651		1.20455	1.24618	3.98204	0.602212		0.624188	0.931754	0.580232	1.14452	1.13816	0.686666	1.84383	1.52393	2.97844	1.80293	0.934067
UNSA-00262	Discharge_Poor	1.40687	0.803977	7.91297	0.170461	2.06484	7.38043	1.97413	1.95294	0.576913	1.18226	1.27527	10.7852	1.07388	1.18868	3.49216	2.03271	3.21747	24.4477	2.57954	0.433663	0.296901	0.103769	3.12533	1.6745	0.995325	1.47291	1.24843	0.586114	1.97834	1.45976	3.49188	1.30727	2.53744	4.1427	0.800039	1.58263	1.88732	1.18351	1.4859	1.74378	0.882424	0.579993	2.7493	0.313972	0.675168	0.629548	0.895932	0.60192
[truncated: 861 more columns]

## Sheet: Normalized_Sample_No_Outliers
PARENT_SAMPLE_NAME	GROUP_ID	55	93	98	111	112	136	144	158	171	180	181	182	187	189	192	194	197	209	212	229	231	234	235	240	241	244	250	252	254	266	267	273	275	278	279	297	302	310	313	314	330	331	338	339	340	342	344	355
UNSA-00002	D1_Good	3.60431	1.5702	1.6714	2.53516	0.778471	11.0447	25.2121	1.48399	0.909946	0.421926	0.772898	9.942	1.09667	0.766172	1.27227	1.3642	1.56888	0.975354	1.98357	0.464016	0.811065	0.557771	2.02852	2.79593	0.47596	0.688283	2.03165	0.69035	2.24593	0.960146	1.10644	1.02282	1.25433		1.63217	1.66274		2.03357	1.11145	0.65235	1.42898	0.809153	0.524315	3.23283	0.721989	7.63786	2.83717	1.14208
UNSA-00007	D1_Good	1.3099	0.903094	2.38703	0.897424	1.06672	0.999231	0.867319	1.94732	1.12915	0.985407	0.863489	3.76877	2.79548	1.51498	1.71323	1.63333	0.785598		1.50425	1.03518	1.71302	1.5399	4.39536	1.09756	1.66226	0.938765	1.25649	0.982751	0.586744	1.42486	1.48209	0.147022	1.16119	1.36982	1.02803	1.54409	1.07159	1.25621	1.28476	0.441071	0.816014	0.655177	1.03949	0.632963	1.7684	3.01451	0.858824	1.85599
UNSA-00015	D1_Good	3.3902	1.32283	18.1218	1.37959	13.5885	0.395944	12.6148	0.818358	0.827225	0.373113	0.524462	23.3423	1.6317	1.62207	2.66562	3.41563	4.28294	0.444455	2.27833	0.567629	0.746177	1.06517	4.05335	1.06791	1.2967	1.32069	0.620421	0.529897	0.653067	1.01699	1.23438		4.23209	6.89058	1.67434	0.79247	1.22806	2.07989	0.599096	0.808558	0.885298		12.0237	1.97804	0.655484	1.1287	0.701356	0.858489
UNSA-00016	D1_Good	0.749389	1.09653	17.4572	0.805074	3.26711	0.765182	3.49518	5.45732	1.50629	2.5908	1.87028	49.9939	1.88216	2.1631	1.52015	2.77984	4.52505	1.05562	2.30265	2.01894	0.981518	0.559958	1.14034	2.07468		1.8304	1.27849	1.71514	4.84776	1.38778	0.951425		1.86124	1.8515	0.985479	0.88474		5.41248		1.39068	1.67711	0.735316	15.7711	0.988395	1.11903	0.4942	0.48386	0.695969
UNSA-00018	D1_Good	0.311235	0.865151	0.402545	0.393325	0.469878	0.366895	0.574663	0.754759	0.532607	0.921611	0.676226	0.247973	0.224523	0.399176	0.191446	0.471158		0.82015		0.871055	0.562962	0.416523	0.187681	0.527803	0.511085	0.535113	0.390859	0.471756	0.817978	0.552363	0.772716		0.433385	0.470589	0.899679	0.52573	0.992168	0.484346		0.64322	0.716879		0.57268	0.670593	0.580565	0.0427496	3.85029	0.691996
UNSA-00020	D1_Good	2.71528	2.70546	1.54406	2.58237	2.45131		0.752932	3.7998	2.52437	2.57641	1.81711	5.67136	1.0634	2.29598	1.48235	1.82531	1.80958	0.882665	1.83996	1.47831	0.902025	0.362185	1.27492	2.241	0.85358	0.992244	1.17549	0.967678	14.328	0.947023	0.755763	1.20465	2.0207	1.49988	1.28423	0.850562		7.7182	0.714753	2.78716	2.81998	0.854919	34.0649	3.25927	1.07479	0.0584546	1.18113	0.923982
UNSA-00023	D1_Good	0.821956	2.44734	1.26143	3.04134	1.94942	50.0614	3.40212	0.744349	1.06679	0.479035	1.68422	1.29639	0.864801	0.555977	3.54314	1.08501	1.26734	0.838407	0.262575	0.556817	0.758691	1.31468	1.78401	1.49071	1.3488	1.07101	1.54956	1.05817	9.1683	0.740948	0.658895	2.01935	1.43876	2.86583	0.857541	1.8641		1.93536	1.32681	0.56083	1.73794	2.01092	0.72056	1.81295	1.14914	10.5309	1.23884	1.25
UNSA-00024	D1_Good	0.202424	1.14092	0.323091	0.696208	0.971272		0.164841	0.416877	0.972241	1.51372	2.01981	0.935753	0.677852	0.3779	1.27637	0.762012	0.564959	1.14445	1.62142	1.58276	0.944354	1.16161	0.150311	0.768025	0.912787	0.553366	0.649406	0.448652	1.74854	1.26843	0.796867	1.13957	0.769598	2.47869	0.650823	2.32637	0.557089	0.645576	2.66391	0.965879	1.22763	0.66852	0.928648	0.389201	0.867193	0.0812004	0.413149	1.16179
UNSA-00028	D1_Good	0.448482	0.971062	0.423204	1	0.685409	0.282683	0.712247	0.927205	0.697536	0.998972	0.823961	0.907192	1.33864	1.21777	0.586055	0.728526		0.949736	0.284084	1.31283	1.39956	0.845542	0.671209	0.651273	1.23119	0.852984	1.23097	0.525968	1.41206	0.894233	0.695814		0.610874	0.92081	0.937632	0.634558	0.772729	1.04452	0.829435	1.5608	0.890333		1.42806	1.11372	0.960565	1.53481	1	1.15125
UNSA-00030	D1_Good	1.02856	0.710275	0.95691	3.26143	0.578242	0.978331	0.301498	0.702068	0.912693	1.96976	1.27203	1.42211	1.03623	1.14923	0.269252	0.552107		0.652743	0.22419	2.80623	1.35645	1.01135	0.325662	1.22117	1.17622	0.868602	1.00902	4.08078	7.03283	1.86106	0.887682	1.05703	0.660348	0.339578	0.855447	0.616211	1.02969	1.04617	0.90368	1.87396	0.827476	0.51666	0.506328	1.1459	0.993973	2.83454	0.58916	1.28214
UNSA-00034	D1_Good	1.26881	1.19991	0.951685	2.12198	1.20062	1.75905	0.517321	1.1483	1.00997	2.51358	1.37904	3.74313	0.789072	0.775549	1.16913	1.01311	0.580103	0.914464	0.609644	1.42261	1.17295	2.12196	1.00425	1.26701	1.28128	1.44157	1.19996	0.464351	2.40759	1.16754	1.0865	1.30094	1.2301	0.914529	1.49197	2.92731		0.595235	1.70481	1.9718	0.616746	1.40687	1.02226	1.02985	0.908044	2.39286	0.644163	1.19493
UNSA-00036	D1_Good	3.14328	2.07808	3.12728	1.5692	1.98062	1.76316	1.82877	2.02667	1.62499	1.56855	1.78016	0.946219	1.8513	1.50639	1.41351	2.08109	1.78185	1.14805	1.27667	2.37706	1.4082	1.0689	1.15481	1.4826	0.786815	1.58363	1.65804	0.236806	6.29052	1.61753	0.899974		1.74268	0.690784	2.24457	0.848239	1.00783	0.886545	1.15138	0.794022	3.58715	1.03113	0.918113	4.67429	1.1252	0.612486	1.20289	1.227
UNSA-00040	D1_Good	2.40824	2.57376	1.99788	0.716688	3.30231	0.232649	0.715965	1.25597	0.69388	1.34663	1.74973	3.67236	1.00058	1.07301	2.72625	1.00596	1.66427	1.01694	1.82957	0.646539	0.862078	1.0395	1.45072	1.39554	1.01746	1.19007	1.69898	3.43197	1.55517	0.635985	0.998373	0.938199	1.67532	1.9731	1.51097	1.22464		1.47362	1.47368	0.981473	1.37215	1.31352	94.137	1	1.49014	0.356725	0.977929	1.08873
UNSA-00041	D1_Good	0.764874	1.38776	1.77802	2.66828	1.27326	1.00077	1.37321	0.980854	0.465217	1.50381	1.64423	4.02817	0.903986	1.068	6.90982	2.0205	2.0112	9.8527	1.79688	0.879576	0.989261	0.226481	3.10815	1.22753	1.14024	1.16887	0.572909	0.0996096	4.1638	0.774855	0.951828		1.54188	5.66457	0.798441	0.703676		1.31874	0.787569	1.01718	0.991182		1.24488	1.97188	0.928595	0.662981	0.479257	1.53295
UNSA-00046	D1_Good	2.20973	0.997522	2.71657	1.48018	0.812981	0.693833	0.988376	1.35929	1.55884	1.06092	0.989104	4.38541	3.72238	1.28883	1.05549	1.17424	0.927559	1.00107	1.53715	1.09118	1.35244	1.49401	1.4066	1.45163	1.06858	1.17673	0.80109	0.721066	3.06471	0.896439	0.757969	0.246372	0.669367	0.692148	1.03866	0.715662	0.533001	0.526723		0.72294	0.679145		0.741451	0.918697	0.969024	0.571387	1.00674	1.34104
UNSA-00052	D1_Good	3.01684	0.969027	0.97424	1.8393	0.754063	0.281615	1.31528	1.87119	1.99805	1.24487	1.07179	0.121735	1.47967	0.640345	0.480251	0.954133	0.802176	0.892033	0.557313	1.41453	1.32897	1.68435	1.89458	0.845502	1.50393	1.34094	1.3617	0.0798338	1.81081	2.05255	0.779811	3.09084	0.969062	1.22845	2.03861	1.21128	1.88262	0.534386	0.689753	1.00576	0.747078	0.36229	1.95681	0.993714	1.36626	0.174467	0.972194	1.16769
UNSA-00056	D1_Good	11.463	1.43744	44.6812	4.12758	11.793	0.963834	4.63174	2.48888	0.916162	2.19198	1.7578	34.5868	5.40408	5.2484	3.3224	7.92871	9.62057	0.554031	6.11828	1.91358	1.17009	0.540771	19.4159	5.69877	13.0359	1.76303	2.22717	1.09761	15.3454	1.20273	1.1034	1.36199	7.78536	10.2378	1.12249	0.683716		17.7689	0.574584	1.11121	1.6244	0.427448	42.8467	1.32727	1.37587	5.09854	2.3956	1.27438
UNSA-00058	D1_Good	2.80463	1.93029	15.8266		5.95452	0.207462	1.43706	1.25284	2.11052	1.22543	0.824791	5.67977	1.27342	0.665884	1.60816	1.71606	2.54593	0.689257	0.745892	1.5973	0.316148	1.64458	1.67358	2.1713	1.26804	1.93627	0.981894	1.32526	12.3643	0.651964	1.89119		3.04208	3.71526	0.687787	2.12377	0.299669	1.29844	1.12446	1.08964	1.11469	1.42968	3.698	0.967656	0.532848	0.351086	0.627066	0.472811
UNSA-00063	D1_Good	1.34215	1.34085	1.24011	1.96544	1.0425	1.17293	0.924924	1.15061	0.842731	0.880801	0.843992	0.515349	1.05899	0.415974	2.19277	1.95944	0.768572	1.35921	0.67364	1.11109	0.787895	0.205394	1.6716	2.2894	1.28747	0.949067	0.798918	0.72314	1	0.865387	1.09311	0.623004	1.47522	5.98655	2.06515	0.562941	1.36472	1.54425	0.705433	0.432584	1.67552		1.71529	0.945542	1.11308	0.258294	1.88452	1.23208
UNSA-00067	D1_Good	4.6089	0.936395	0.448086	0.553292	1.10377	0.420137	0.67718	0.639322	1.29684	1.00103	4.085	0.70684	0.252208	0.366055	1.00628	0.790084	0.903543	0.974207	0.297939	0.970515	0.43893	1.06781	1	0.318712	0.609952	1.32144	0.227649	1.16245	0.517223	0.784891	1.4868		0.999887	1.06829	0.90442	1.03852	0.974543	0.283892	1.07505	1.187	0.716142	1.23346	0.937934	0.607755	0.650724	0.934248	1.36449	1.1179
UNSA-00068	D1_Good	0.565964	1.79486	0.835614	2.04175	0.612295	5.88744	3.20316	0.37556	0.861792	1.97174	0.666508	1.25304	0.538686	1.76103	0.542788	0.986815	0.564421	0.77038	0.483693	0.819302	1.67588	0.499843	1.3302	1.10812	1.09827	1.19332	0.609953	1.07134	0.943491	1.23538	0.79283		0.828985	1.41278	1.4196	0.668543	5.45269	3.89502		6.6708	1.99995	0.695312	2.84197	3.08373	1.21583	2.7149	0.192879	1.32785
UNSA-00070	D1_Good	4.41664	1.11084	2.61857	1.09181	0.572811	7.62384	1.56808	0.507542	0.396868	1.00246	0.591881	1.61122	1.51487	1.23825	0.596015	1.19937	0.753589	1.03835	0.345825	1.19303	1.6375	0.523824	0.759202	1.10112	0.849645	0.999224	0.580938	0.835373	0.464108	0.874597	1.24646		1.17997	0.59094	1.34169	0.793329	1.48702	0.734863	1.0907	2.26086	0.907433	0.473907	0.859221	1.44467	0.982096	1.84172	2.3741	1.03097
UNSA-00074	D1_Good	4.14633	0.867223	13.4129	1.5121	1.60265	0.240235	6.36449	0.961041	1.09545	1.36548	0.708887	40.2232	0.957973	5.53829	6.86016	3.03242	4.40615	0.718348	1.69945	0.988464	1.51191	0.500835	5.71889	3.16839	0.857154	1.31456	0.275307	1.09009	4.15841	1.58722	0.887641	1.55401	5.86466	3.08527	2.39809	0.723229		10.2706	0.85757	2.96107	0.897465	1.12301	44.0818	0.774957	1.00603	0.264409	0.823224	1.11624
UNSA-00079	D1_Good	0.422767	2.0428	0.81452	0.684357	0.726855	0.59593	1.24474	2.45247	2.51662	1.27848	1.0109	1	0.874601	1.01989	1.0222	1.03526	1.3907	1.55405	1.01229	1.01154	1.03404	1.03448	0.939889	1.19807	1.05564	1.20032	1.22838	1.40583	0.556652	1.23183	1.02882	1.93863	1.34685	0.613375	1.61607	0.946498	0.834087	0.590918	0.915881	0.778919	1.03351	2.26527	1.47731	1.38393	1.01119	0.591026	0.77915	1.10749
UNSA-00080	D1_Good	2.97263	0.773749	0.510319	0.920509	0.735228	3.94826	1.87182	0.430068	0.367776	0.964893	2.69771	0.809975	0.804665	0.559161	0.698009	0.588004	0.303798	1.58234	0.613143	0.82202	1.15241	0.344421	0.563843	0.628875	0.685841	0.604235	1.16929	0.57004	11.2324	0.796757	0.78068	0.352266	0.944237	2.1433	1.1161	0.527102	4.14898	0.152186	0.699948	0.803843	0.941724	0.679411	1.02589	2.50005	0.553492	1.42025	0.440443	0.803275
UNSA-00093	D1_Good	0.747928	0.436413	0.825421		0.795551	4.88417	0.4263	0.535253	2.51049	1.0885	0.763552	0.353724	0.645302	0.695887	0.547194	0.94604	0.512841	1.25651	0.397281	1.51286	0.927419	1.17206	0.354756	0.899011	0.871294	0.587275	1.55548	0.521858	38.9125	1.04077	1.28123	1.29082	1.00011	1.02667	1.26953	0.480162	1.17545	0.381884	0.996842	0.875517	0.44859	0.381502	0.271936	0.733735	0.567996	1.23882	0.284155	1.16559
UNSA-00094	D1_Good		1.24341	0.777042	0.548941	0.569457	0.704805	0.142084	0.668834	1.42332	1.93703	1.49432	0.409231	1.13094	0.638768	0.906381	0.669069	0.678406	1.17246	0.683769	1.98946	1.25534	3.75303	0.210397	1.149	1.41724	0.888658	1.71737	1.27098	4.20651	1.448	2.00318	1.51951	0.730623	0.592923	0.620943	4.56687	0.839364	2.3414	1.74351	2.68604	0.430616	1.4788	0.733943	0.81882	1.29722	4.63167	0.588508	0.935954
UNSA-00097	D1_Good	0.864039	1.33876	1.82746	1.58078	0.87837	0.888494	0.481882	0.706693	0.617051	4.54274	1.39946	0.529727	0.437229	1.49142	1.12411	0.9129	0.60661	1.064	0.676537	1.98966	1.79189	0.518799	1.09186	1.26839	0.951184	1.08075	0.817191	1.08089	0.572513	1.03761	1.25424		0.949474	0.759571	1.10801	0.539228	0.493531	1.02686	0.508893	16.9583	1.46707	0.450151	1.29692	1.26731	1.21189	0.294269	2.54177	1.35528
UNSA-00098	D1_Good	1.11566	0.88657	2.2454	3.24777	2.20608	2.58175	3.92202	0.723665	0.785345	1.34582	1.54566	8.08454	1.30318	2.57802	4.83129	1.82382	2.37925	0.817633	1.61353	1.18484	0.822355	0.78752	3.23231	1.61368	1.68642	1.35375	1.52329	1.4381	17.2139	1.09882	1.25191	1.65139	2.01181	0.580238	2.41086	0.644821		2.86377	0.778061	0.870077	0.747698	0.753763	1.01128	1.11867	0.639063	0.0955692		1.53303
UNSA-00104	D1_Good	0.562419	0.634515	13.4943	1.8789	1.51511	10.1904	22.3301	0.86533	0.913009	0.97991	1.61747	10.5357	13.31	3.79313	2.69973	3.24422	3.52202	0.943937	4.52361	0.705156	1.20981	0.822309	2.17182	3.23219	4.9424	1.7485	1.54557	1.11042	5.51213	1.5446	0.514285	0.49222	3.01384	4.25862	0.840628	1.54528		2.71819	1.22966	0.926498	0.830181		2.64808	0.796755	0.811144	0.279864	0.423635	1.28973
UNSA-00106	D1_Good	1.22658	1	0.529621	0.652125	0.555389	1.3485	0.334697	1.68507	3.35781	0.548812	0.855662	0.322841	0.468888	0.315981	0.799031	0.787095		1.10124	0.284693	0.661232	0.441342	0.815274	0.169078	0.672839	0.747089	1.05133	1.95257	1.0118	0.91655	0.716502	0.922102	1.20577	0.477022	0.770707	0.486987	1.03122	1.74216	0.219337	0.753405	1.06649	1.86283	0.728334	0.778084	0.914088	0.825274	0.244007	1.00851	0.699776
UNSA-00109	D1_Good	0.329541	0.939914	0.372946	0.436468	1.33364	1.99537	0.481746	0.198439	0.730556	0.783969	1.1794	0.515342	0.70195	0.449603	2.28749	1.04888	0.877377	0.963055	1.08898	1.04665	0.850177	0.926192	0.492261	0.6857	2.5029	0.74443	2.87767	0.919252	0.943253	0.878981	0.916808	0.877112	0.968904	1.36661	1.03082	0.759296	3.06756	0.249309	0.859221	0.492076	1.05748	1.36058	13.1457	1.3837	0.88637	1.22181	0.44055	0.923077
UNSA-00001	D1_Poor	1.01506	2.18393	0.913253	1.45898	2.07377	0.699945	1.35801	2.92948	0.976309	2.43926	4.76323	1.54253	1.84759	1.90848	0.887549	0.95663	1.63242	1.37781	1.30248	3.19038	1.61922	0.544274	1.31836	1.01647	0.762454		0.945099	1.18369	6.45279	1.76004	1.16284	2.52442	1.1159	1.27098	1.94719	0.805767	0.302403	1.05066	0.960096	2.47701	1.02873	1.36567	156.243	1.42687	1.17809	0.655065	0.393992	1.45522
UNSA-00006	D1_Poor	0.601401	0.472598	0.282284	0.454139	0.296435	0.401753	0.455952	0.273888	0.882934	0.895471	0.725212	0.252113	0.082752	0.196763	0.21525	0.324034		0.98316		0.847108	0.784857	1.15093	0.0579311	0.51551	0.451105	0.501261	0.923696	0.446102	1.73598	0.765498	2.55373	0.702709	0.420814	0.282305	0.228339	1.16517	0.408347	0.1808	0.754347	0.448721	0.485678	0.731191	0.380174	0.656958	0.472902	0.18724	1.52199	0.735836
UNSA-00008	D1_Poor	4.99858	3.04135	2.697	1.06281	0.980914	12.1009	10.324	3.1256	0.879831	1.95542	3.0221	7.64632	1.4817	1.2209	1.61771	1.6663	2.33446	1.00266	3.74759	2.58062	0.747752	0.572865	3.81964	2.21378	0.456254	0.810074	5.92272	1.25937	0.339283	1.29598	0.899371	1.84247	1.8931	0.710672	1.37928	1.39115	3.958	0.951306	1.14454	1.23162	2.59141	0.519362	8.16514	0.914368	0.634099	9.50512	0.225556	1.4094
UNSA-00011	D1_Poor	0.082969	0.160599	0.05259	0.0714959	0.118575	0.29255			0.195254	0.0862312	0.382492	0.0589262		0.0123477	0.069334	0.070172				0.0326572	0.083296	0.170611	0.0392865	0.145878		0.119332	0.0536476	0.105188	0.08574	0.137075	3.80123		0.0906949		0.0826343	0.806337	0.153849		0.516938	0.610332	0.102091		0.0657509	0.155356	0.131554	0.159453	1.99479	0.149984
UNSA-00012	D1_Poor	1.66154	2.22569	0.544881	1.13767	1.10758		0.247627		1.9124	3.81316	1.88873	0.37184	0.347666	1.30349	0.378784	0.55432	0.295016	0.679635		2.40449	1.23873	1.32991	0.995765	0.774199	0.883842		0.30671	0.803727	4.61099	1.0251	1.00451	0.249288	0.557287	0.351408	0.89071	1.88638	0.810574	1.01155	1.39002	8.18591	0.982331	1.53505	0.977114	0.721329	1.14885	0.299115	0.452902	1.29406
UNSA-00017	D1_Poor	6.86128	0.167506	14.477	1.71761	5.6528	0.680057	17.4355	1.79464	1.46011	1.13466	1.19409	35.4248	6.99147	2.79186	6.86155	1.54474	4.22564	0.595772	2.60047	0.861762	0.956821	0.761983	1.75794	2.65086		1.34076	0.283467	0.987384	4.67948	1.0307	1.01344	0.212804	4.53564	2.22329	0.922975	1.35889	0.116232	1.39969	0.744396	1.80448	0.631031		9.80886	1.03813	1.14202	1.07729	1.53684	0.969562
UNSA-00019	D1_Poor	0.471202	0.654426	0.283026	0.338655	0.275227	0.270633	0.51618	0.487784	0.235378	0.257527	0.749898	0.331585	0.156169	0.117783	0.157809	0.334067		0.88206	1.19225	0.0974301	0.14413	0.425073	0.370361	0.194876	0.67753	0.244274	0.290048	0.285384	0.0907434	0.259997	0.854291	0.659552	0.320658	0.885156	0.0922051	0.504441		0.357479		0.865971	0.446041		0.162576	0.203198	0.238904	0.316693	2.24566	0.276277
UNSA-00025	D1_Poor	1	2.41861	1.43263	1.75789	1	2.73712	1.03097	0.870913	1.50623	1.28701	2.11202	3.48342	3.69591	2.17203	0.988052	0.946155		1.22067	0.706425	1.16032	2.05319	2.0829	0.529393	1.18914	1.43014	1.0863	1.09177	0.913432	1.73987	1.86227	0.812633	0.209679	0.861736	0.158527	1.52053	1.87951	3.54299	1.12627	1.75701	1.72938	1.35761	1.40014	1.51355	3.37741	1.16053	2.26986	0.520246	1.18795
UNSA-00029	D1_Poor	2.16735	1.60991	0.322743	1.07953	1.1172	10.4291	1.2033	1.20114	0.75192	0.786904	0.789612	0.800503	1.15841	0.417943	1.34684	0.804129	1.3293	0.986283	0.634795	0.65425	1.26186	0.860559	0.906327	0.983528	0.939844	0.730137	0.728814	4.74278	0.743401	0.869896	1.05796	2.08912	0.839222	1.64937	0.999786	0.67547	6.4836	0.972709	0.790616	0.994239	1.50453	2.28549	1.11436	0.973638	1.07096	5.95108	1.27198	0.985054
UNSA-00033	D1_Poor	0.164828	0.153796	0.0899448	0.320344	0.340741		0.29481		0.088483	0.010014	0.307339	0.414577		0.010681		0.081557		0.694738		0.0141367	0.0490157	0.0586447	0.849208	0.0977969		0.102421	0.0456501	0.220452	0.446044	0.0833386	1.34186		0.144961		0.0519102		0.0783746			0.201655	0.244693		0.147627	0.713698	0.123077	0.156324	0.703752	0.169032
UNSA-00035	D1_Poor	1.9779	1.01135	3.06623	0.973559	2.48909	0.194443	0.705433	0.547787	1.89077	1.042	0.573048	3.28867	0.538278	3.04817	0.763307	1.33692	2.9869	0.888623	1.7435	1.58197	1.38954	0.837439	3.4027	1.98513	1.37054	0.820035	0.476227	3.603	1.91346	1.33352	1.11194		1.93216	0.934535	2.15324	0.445472	0.810152	1.72361		0.989638	1.23106	1.01848	1.50526	1.45781	1.04559	0.0567055	0.888831	1.97091
UNSA-00042	D1_Poor	1.53067	0.918355	2.27959		1.37787	0.35599	1.4867	1.34592	1.17661	1.61814	2.40667	0.472107	1.02001	1.11305	1.04443	1.46246	1.17365	0.944543	0.872569	1.22748	1.15836	0.816521	0.985507	1.62149	0.529205	0.778572	1.32476	0.0840242	18.7	1.00554	1.40675	1.83178	1.16924	0.36749	0.653891	1.03412	0.434528	1.0185	0.740484	1.40716	0.74946	0.571046	0.642234	1.04231	1.35178	0.344629	1.2045	1.28981
UNSA-00045	D1_Poor	1.32444	1.81024	4.54906	2.03851	2.26004	1.41869	6.40424	1.58741	2.55368	1.08844	1.24583	3.20668	2.48331	2.36925	0.750996	2.15459	2.41897	1.12817	2.19115	1.24793	1.49559	1.19917		1.9928	1.07284	1.51948	1.50073	3.00654	0.501769	1.15708	1.17381	1.2029	1.58853	1.7357	2.12069	1.65692	1.15803	1.4865	1.11393	1.03209	1.75643	4.47843	4.32702	0.963856	2.65704	1	2.09349	1.18559
UNSA-00047	D1_Poor	0.279499	0.640364	0.329097	0.892632	0.714565	0.254033	0.177435	0.523562	0.981632	2.00214	0.816885	0.271944	0.60171	0.35039	0.579583	0.706385		0.942886		2.23983	0.751644	1.153	0.696471	0.640308	0.660991	0.726625	1.40351	1	4.86884	1.0712	0.827003	0.868445	0.709851	0.472622	1.06424	1	0.71737	0.0944488	0.832393	3.63964	0.677124	0.849874	0.600929	1.08259	0.739083	2.95388	0.501182	1.18756
UNSA-00051	D1_Poor	0.803926	1.08801	0.355981	1.22058	0.783838	2.70125	0.615132	1.50228	1.34993	0.461015	0.54863	0.91637	0.460794	0.485222	0.758828	0.72616	0.658548	0.83092	0.531371	0.443013	0.888273	0.999357	0.99575	0.730779	1.80219	1.02617	1.07737	0.36938	0.192079	0.812297	0.642257	1.24555	0.736388	1.57701	1.04032	1.20149	2.05811	0.547345	0.947729	1.16733	1.0036	1.42339	0.942687	0.673809	2.26431	0.323277	1.09837	0.93679
UNSA-00053	D1_Poor	1.48055	1.3364	11.0924	5.47102	3.0634	30.4133	21.9956	0.532199	2.78503	1.24039	0.766115	25.3166	2.0705	1.79948	5.3779	3.04418	6.41992	0.876611	8.78732	1.66637	1.13314	2.99462	7.06619	2.71051	4.59293	1.50138	0.550815	3.92031	0.764573	1.73695	1.14934	0.644538	3.14052	8.23859	0.743765	2.5943		4.94116	2.4638	5.31034	1.40875	2.82491	9.22032	0.979569	0.840608	52.5223	0.214592	0.873177
UNSA-00057	D1_Poor	3.2347	0.784124	5.34759	2.82376	0.875849	32.4861	5.66696	0.946893	1.09572	2.93936	1.32195	16.1226	1.30975	1.15893	1.39225	2.20266	1.08558	1.01015	1.40651	1.74127	1.65718	1.98231	2.32198	1.01779	1.41209	0.98468	2.7964	1.00597	0.89288	2.02798	1.00163	1.29204	1.17065	4.73913	0.776649	2.06632		1.74614	1.49355	6.28469	1.13686	1.96497	2.07073	0.779772	0.85049	8.35249	0.318563	1.4173
UNSA-00061	D1_Poor	0.708603	0.201788	0.68431	1.23967	0.399888		0.1734	0.375527	0.911249	0.246527	0.48386	0.829306	0.352992	0.225384	0.297803	0.414504	0.902199	26.7578	0.284758	0.123598	0.48652	0.171512	0.352213	0.292202		0.38481	0.0841145	0.255359	11.7966	0.269462	1.8201	0.430993	0.497337	0.419454	0.16439	0.321001	0.0439001	0.219717		0.592937	0.376794		0.233629	0.602064	0.365449	0.0188891	0.206739	0.466647
UNSA-00062	D1_Poor	1.45317	1.90345	0.62046	1.38459	1.38142	1.5834	1.61987	1.02541	2.66992	1.80208	0.92661	1.22037	0.66906	0.977365	1.20754	1.28163	1.03106	0.917396	0.98771	2.32526	1.11213	1.55118	1.13145	0.955191	2.24423	0.904239	0.43031	1.54099	3.09883	1.25873	1.4916	1.19762	1.34352	1.31516	1.43821	1.34361	8.15825	0.516642	1.61183	0.732307	1.68498	2.70503	1.5152	1.564	1.28951	0.966331	0.384898	1.29758
UNSA-00066	D1_Poor	0.100671	0.0695633	0.0949204	0.196218	0.0866315	0.436175		0.516869	0.485377	0.034893	0.415904	0.02601	0.0258233	0.0128841	0.050387	0.0857627				0.0370652	0.0577414	0.346443	0.0575731	0.192561	1.58933	0.169659	0.853405	0.156653	0.816516	0.120951	2.44758		0.120423		0.028377	0.712405	0.061778		0.4483	0.46573	0.0683795		0.0519397	0.160788	0.117241	5.28754	0.53424	0.133469
UNSA-00069	D1_Poor	1.05405	0.730784	0.454013	0.621259	0.474061	1.3969	0.219405	0.388197	1.28682	1.06853	1.32157	0.584983	0.237358	0.252308	1.0048	0.666495		1.17762	0.232446	1.0817	1.05515	1.00064	0.518831	0.245886	0.852164	0.658968	0.405424	0.534622	0.859098	1.16221	1.71622		0.785392	1.8926	1.28521	0.370799	2.29543	0.0824182		0.537193	0.748649		1.15916	1.08193	0.563598	1.03079	1.70699	0.97511
UNSA-00071	D1_Poor	1.47336	0.909882	0.488176	1.28328	0.268864	1.77432	1.7089	0.788316	0.28856	0.126155	0.620696	2.1344	1.11088	0.229665	0.875353	0.434089		0.91507	0.502876	0.0958288	0.623503	0.512287	0.158247	1.28921	0.949488	0.779447	0.805361	0.638127	2.34893	0.278679	0.72486	1.04556	0.654481	0.102328	0.769749	0.701616	2.87154	0.865232	0.653628	0.48683	0.86441	0.557393	0.253079	2.74182	0.583174	7.772	4.07209	1.05239
UNSA-00075	D1_Poor	0.331057	0.720629	3.29358	1.51532	0.837943		5.36781	0.703797	1.12855	2.48403	0.975265	4.5191	3.49833	3.11118	0.995201	1.73262	0.713641	1.05982	0.877623	1.43122	1.42733	1.18093	3.05938	1.4476	0.89571	1.19159	0.608166	0.769519	2.89008	1.25308	0.569028	0.163703	1.60421	1.59222	1.1532	1.35885	1.43084	1.3266	1.42334	4.8546	0.923412	0.87021	0.934298	1.01161	0.810323	1.29858	0.149528	1.10753
UNSA-00078	D1_Poor	2.06167	0.895152	1.06567	0.994664	0.83019		4.51809	0.863524	0.597319	0.669041	1.55115	2.10868	0.617755	0.317872	1.15524	1.01331	1.74864	1.18214	1.05618	0.249913	0.408422	1.03103	0.731963	2.26	0.964304	1.01742	2.19998	1.05614	0.979186	0.500345	0.674748	0.410929	0.708221	0.692098	0.748479	1.80126		3.18522	1.28906	0.529962	1	0.430436	0.326856	3.72459	1.2583	11.5494	3.65304	0.837587
UNSA-00081	D1_Poor	0.394	0.388349	1.90097		1.4368	1.84076	0.566477	0.944463	1.37498	2.65535	1.53644	1.31398	1.01674	1	0.485299	1.55786	0.788089	1.17685	1.33729	3.60577	1.09747	1.62996	1.4739	2.22618	0.605067	0.80657	0.82745	0.99816	66.7151	1.71318	0.944007	0.936185	1.14748	0.878916	0.59782	2.32595	2.88801	0.545137	1.92029	2.26979	0.761433	0.556891	0.485133	0.977832	1.00752	6.10617	1.64805	0.666925
UNSA-00084	D1_Poor	0.455907	0.791139	7.38658	3.19665	2.76081	0.402736	1.69688	1.31254	1.12915	2.81843	4.05572	8.64336	1.36643	2.45384	4.70696	2.20276	3.21555	1.28274	3.28061	1.05179	0.611106	0.327271	3.28037	1.93444	0.88314	1.25724	3.4934	1.08498	14.2801	1.1685	0.990583		3.11984	2.31803	1.76543	0.723483	0.324772	3.33922	0.829856	1.34878	0.837155		6.09537	1.49291	1.29516	3.96107	0.226128	1.3672
UNSA-00088	D1_Poor	0.793265	2.82996	7.94546	2.86494	3.69075	0.540064	19.4451	0.674017	1.11657	0.77327	1.32774	27.1353	1.97198	3.00604	1.72085	3.01474	3.31566	1.01311	3.22458	0.567907	1.46096	1.14004	5.67774	1.6053	3.32329	1.44922	0.372852	1.53551	1.49377	2.07305	1.46512	1.45857	3.17259	3.99122	1.80654	2.31883	0.445301	2.26359	2.07715	0.793942	2.01691	1.09423	10.4803	3.68071	1.46092	0.567042	0.765253	0.915827
UNSA-00089	D1_Poor	4.18296	0.738306	1.23842	3.25061	1.08044	0.179499	1.33896	1.30757	0.221844	2.27808	2.15773	0.590687	3.30926	1.75546	1.03124	1.38513	0.928527	1.22248	0.714027	1.33298	2.48655	1.21537	1.36508	1.79523	2.50142	1.28918	0.667016	1.32306	19.2204	1.86688	1.33372		1.26889	2.15473	1.00021	0.841685	0.704566	1.4288	0.986924	1.55729	1.40911	1.398	0.446988	1.07783	1.87487	1.75022	1.81176	1.47639
UNSA-00092	D1_Poor	2.29669	2.42981	3.81275	1.51066	1.30835	4.64288	1.11633	2.02007	3.41119	1.59078	1.10223	8.22971	3.75681	2.36269	1.64307	1.90606		1.17772	8.82918	2.00496	1.94259	5.00226	3.08613	1.49156	1.28436	2.01334	1.29564	1.51038	0.271222	1.97749	1.39313	1.27823	2.70268	3.09209	0.360704	6.99733		2.28789	3.09843	1.40782	1.64598	4.46201	3.23207	0.830332	1.57639	1.02496	0.408822	1.06041
UNSA-00099	D1_Poor	0.354346	1.47782	0.904766	0.94701	0.98018	14.9426	1.23886	1.25079	1.53196	0.792236	2.53401	2.42542	1.14619	1.01483	2.44483	1.74326	0.675287	1.11931	1.52073	0.719929	0.619291	1.11664	0.818126	1.47553	1.83844	1.49764	3.34748	1.95416	0.429779	1.11746	1.06339	0.956056	1.40082	1.14389	1.30243	1.18976		0.321564	1.3492	0.916385	2.04177	2.07971	1	3.25749	0.683419	2.05227	0.602337	1.46768
UNSA-00100	D1_Poor	0.477543	2.12995	3.77246	2.88433	1.814	0.84295	3.79352	1.29586	0.985588	0.965965	1.35149	8.53635	1.50293	1.27325	2.15179	1.90346	1.22492	1.31648	3.05795	0.642075	0.813443	1.01235	1.06368	3.04496	3.30785	1.33148	1.22034	1.04039	1.15853	0.71186	1.17852	1.25153	1.42197	9.14983	0.813076	1.70385	0.841118	7.028	1.21531	0.503187	2.97873	0.913334	1.82488	9.84581	0.567594	6.8574	0.80595	0.992314
UNSA-00101	D1_Poor	1.70785	0.83889	1.36736	1.78676	1.17203	2.83665	3.60408	1.81766	0.973218	0.840805	0.652538	0.558919	1.15347	1.73619	0.976117	1.52269	0.950947	1.42258	0.918179	1.33506	0.931917	0.909765	0.743451	0.789236	1.02204	1.00078	3.0573	1.17003	5.7521	1.10022	0.985069	1.03475	1.46942	1.15014	1.52215	0.671322	4.7132	0.189607		1.50293	0.890597	0.301316	0.774664	1.21968	1.1335	5.11318	0.513977	1.14202
UNSA-00105	D1_Poor	0.915695	1.63493	6.86045	2.23512	2.4353		4.2443	1.6256	0.750446	0.315649	0.581038	15.177	2.59411	4.64724	1.83701	2.94673	3.51745	0.998933	3.319	0.292935	1.57129	0.648077	2.05719	3.66599	2.17027	3.11122	0.516811	1.0217	0.779296	0.994942	0.650926	1.13059	2.96226	4.73045	2.28068	2.06964	1.50247	4.60554	1.36548	0.476983	1.46705		2.78319	1.02504	0.897015	0.112162	0.831675	1.05449
UNSA-00110	D1_Poor	0.406848	0.569871	0.26944	1.09388	0.586642	2.15827	2.26733	0.592427	0.473406	0.345749	0.777344	0.629945	0.630094	0.294535	3.71523	0.857242	0.798161	1.09608	1.0515	0.55594	0.807129	1.10414	1.01508	0.979712	1.0641	1.09736	1.45964	0.829601	0.434587	0.839636	0.814312	0.977175	0.828784	0.815834	1.20103	1.15881	11.6834	0.410928	1.18037	0.349554	0.750411	0.735316	0.754415	3.60507	0.721042	0.705929	0.50383	0.899745
UNSA-00003	D5_Good	5.9253	1.70099	1.29	1.9193	0.895196	1.53603	0.744128	2.05528	0.80477	1.00899	1.29454	7.45813	1.28757	1.22746	0.892565	1.24121	1.261	0.649397	1.93756	0.909027	1.01074	0.915771	1.47883	1.64856	0.757277	0.752836	2.62198	0.738448	2.74933	1.27091	1.22932	1.43168	1.26386		1.87349	1.56969		2.56808	1.10965	0.745469	1.58479	0.801107	0.548637	0.622405	1.03868	4.61444	1.46412	0.770551
UNSA-00021	D5_Good	1.45434	1.14877	0.763271	0.674424	1.30634	0.738927	0.627196	1.10178	0.798516	0.225338	0.551274	4.77265	0.887215	1.91967	1.44026	1.48043	1.89904	1.01913	1.47741	0.396221	0.801621	0.559561	1.58989	1.4571	0.961828	0.844482	0.602885	0.855635	0.172259	0.709201	0.745318	0.799433	1.77129	0.486507	0.788231	0.522871		2.54625	0.812535	0.67506	1.39756		2.0194	2.59829	1.02446	2.50512	0.783468	0.884073
UNSA-00031	D5_Good	0.521881	1	0.738665	0.823237	0.764668	7.31077	1.32647	0.526474	0.577476	0.731606	0.675123	0.621655	0.378388	0.882312	0.481954	0.620509		0.890025	0.155917	0.975777	1.58796	0.587215	0.129186	0.88583	1.16417	0.257833	1.03162	0.106958	2.57205	1.40783	1.64845	0.518156	0.756036	0.406193	0.99193	0.55306	2.6817	0.692831	0.740395	1.16286	1.23206	0.557429	0.645042	0.972844	1.57198	1.97201	1.90811	1.3295
UNSA-00037	D5_Good	1.69893	2.25848	1.42309	2.1609	1.57829	1.27775	1.82619	2.75891	5.11051	2.63262	2.33959	1.44684	1.53889	3.31557	1.93528	1.50187	1.99851	1.19148	1.38413	3.9915	1.93449	1.87827	1.25968	1.61603	0.363014	1.63481	1.23	10.4109	1.78795	1.9658	0.901499	0.205116	2.06389	0.362064	2.27221	1.5088	0.305143	1.43292	1.28819	1.90785	3.38664	2.22493	1.23377	8.99648	1.73127	1.22261	1.15859	1.1287
UNSA-00049	D5_Good	0.317483	0.32992	1.12104	0.598424	0.349993	0.139014	0.515526	0.198516	0.462613	0.125568	0.337239	1.22852	0.145451	0.384998	0.487521	0.39577	0.491872	0.837229	0.177024	0.144039	0.269062	0.559556	11.2459	1.67958	0.731483	0.484108	0.0442712	1.03979	0.063413	0.272801	0.621899		0.42745	0.274858	0.316266	0.67593	0.119227	0.403059		0.346349	0.413749		9.6033	0.257811	0.405647	0.122238	1.89119	0.662027
UNSA-00054	D5_Good	1.76275	1.59078	0.519772	1.02644	1	1.8267	0.656287	1.17969	1.18213	1.88011	1.08389	0.526567	0.399402	1.14348	0.624283	0.680753	0.605606	1.022		2.47115	1.29325	2.3887	0.336718	0.782821	1.64109	1.17666	2.03787	0.376107	2.40195	1.10978	0.821834	0.764629	0.686276	0.98303	1.49924	2.3094	1.21015	0.578605	1.33983	1.1758	1.15907	0.835372	0.674261	2.26353	1.35736	3.42137	1.51421	1.02192
UNSA-00059	D5_Good	1.67588	2.07367	9.55684	0.667091	2.35052	0.713296	4.14349	1.4184	1.02654	0.607416	0.570998	6.71911	0.646658	0.917966	0.794991	1.06769	1.54657	3.54755	0.475456	0.456526	0.303976	0.0790339	1.89436	0.747743		0.984649	0.505192	1.12498	2.05899	0.447813	0.667054		1.18792	1.01298	0.471727	0.722015	0.343626	0.988451	0.673796	0.307532	1.44688		0.782739	1.40019	0.807624	0.663976	0.785592	0.445209
UNSA-00064	D5_Good	4.44648	1.20839	1.40752	3.76002	1.67178	1.02765	0.256314	1.74454	5.34097	3.95224	2.58515	0.879254	1.93893	3.85045	0.495367	1.25859	1.54951	1.60688	0.616267	2.28054	1.6593	3.91993	0.825162	2.14008	1.74397	1.65744	1.49814	1.39046	4.1841	1.48262	1.10437	1.42644	1.45576	1.85131	2.08699	2.85806	7.39599	2.19092	1.77366	1.02875	1.39996	2.43213	2.02867	1.34175	2.04931	0.401542	1.40484	1.63233
UNSA-00095	D5_Good	0.351889	0.922799	0.56083	0.991611	1.16835	0.962046	0.356164	1.01844	1.45654	0.630302	0.800085	0.602189	1.30125	0.94661	0.469032	1.02577	0.608563	1.20719	0.323745	1.45892	1.45388	2.60327	0.476603	0.681657	2.36921	1.43231	0.33943	1.01718	0.385381	1.00191	1.48759	1.35513	0.755097	1.22591	0.912961	3.72754		0.472655	1.67992	2.4079	1.25407	0.962101	0.514158	0.864356	1.01078	2.67045	0.435309	0.920767
UNSA-00107	D5_Good	0.701929	1.27539	1.02576	0.911802	0.887619	3.70771	0.734574	2.66555	2.54897	2.44828	1.96234	0.654533	1.00397	0.784616	0.555075	1.04452	0.708336	1.15258	0.870346	1.48974	1.19081	2.27244	0.253216	0.788511	0.431942	1.14853	3.95828	1.25875	5.90072	0.998091	1.11378	1.47686	0.813015	1.47377	1.06592	2.52861		0.459839	1.54764	2.19415	2.86373	2.79554	1.22535	0.860527	1.23318	1.91227	0.981538	0.99742
UNSA-00191	D5_Good	1.67282	1.0349	19.1868		25.2612	2.61665	9.26108	0.687376	0.196877	1.92827	0.97613	10.7201	0.732253	2.17031	1.67056	3.42443	5.444	0.549358	3.14459	1.50892	0.829022	0.730285	3.27897	0.923931	0.96096	1.18704	0.321661	1.39781	8.05929	1.0682	5.74019	0.359771	2.91158	3.59584	0.486702	0.356751	0.323157	2.57861	0.484379	0.626969	1.24122	0.892167	10.1567	1.3884	1.23891	1.16765	1.01302	0.735035
UNSA-00194	D5_Good	0.935713	1.51905	0.948999	0.52779	1.1892	0.388206	0.326931	1.61265	2.16329	1.80507	0.956126	1.25164	0.918798	1.33878	1.74781	1.18866	1.24349	1.26598	1.32233	1.81877	1.23657	1.78023	0.334559	1.19586	1.156	1.1389	0.763093	1.83114	1.02893	1.58246	1.95712	2.06389	1.34012	0.854684	1.01523	2.635	1.78347	0.850539	2.31138	1.55804	1.83426	2.41688	1.52081	1.01165	1.21257	0.215349	1.19817	1.08909
UNSA-00195	D5_Good	2.81629	1.26817	2.95796		1.67989	2.31495	3.63875	1.15555	1.12899	1.32935	1.58253	13.2118	1.51407	2.39714	1.75628	1.68543	2.27347	1.11292	1.75047	1.10422	0.960799	1.34553	2.66051	1.62953	0.611555	1.0439	1.23122	1.2057	8.33504	1.27253	1.5061	0.971481	1.7126	1.00265	0.62655	1.63919	0.978766	4.44816	1.52413	0.397567	0.987401	0.774098	1.09761	1.2757	1.00331	1.83581	1.40589	0.948427
UNSA-00197	D5_Good	0.460168	0.802339	0.954961	0.981184	0.468376	1.63136	0.115941	0.812603	2.01585	0.923676	0.682216	0.194074	0.760306	1.19983	0.87179	0.694908	0.604183	1.29061	0.518471	1.14778	1.46253	2.08687	0.395931	0.662781	0.482901	1.08199	0.316853	0.606947	0.887982	1.35139	2.52971		0.927042	0.870853	0.622946	1.223	0.69696	0.487923	1.49795	1.23116	0.736492	1.2655	0.711884	0.936506	1.21457	0.823297	2.38374	1.30892
UNSA-00198	D5_Good	0.888245	1.0749	1.57786	0.881643	0.96032	0.476671	0.380207	1.35886	1.29233	0.714501	0.623993	2.34543	1.84024	1.90023	0.709568	1.09823	1.2611	1.24683	1.47922	0.73557	1.02281	1.52804	0.763462	1.11573	0.593546	1.30081	0.22868	0.757616	0.350897	1.00382	1.50636	0.114787	0.799078	0.357719	2.69431	0.708853	0.73096	0.466082	0.837618	1.33294	0.979078	1.08927	0.800633	0.68928	1.11992	0.368765	0.679911	0.8879
UNSA-00199	D5_Good	2.87398	0.790387	1.17082		1.43152	1.6338	0.291956	1.1445	1.71545	1.42336	1.69709	1.67062	1.29423	1.62212	0.893518	1.34338	1.03039	1.5466	1.55585	1.84632	1.58725	2.82614	0.590044	1.13864	0.991734	1.68226	0.479422	0.846916	8.77905	1.27276	2.419	1.06133	0.866612	0.670643	0.530426	6.9198	1.06175	1.43531	2.10522	1.25809	0.909627	0.827913	0.666325	0.772214	1.43052	0.963936	2.19426	1.44414
UNSA-00229	D5_Good	2.52089	0.938261	1.22661	0.631895	0.800102	5.72252	0.535372	0.814507	0.555213	1.74288	1.23541	0.365447	1.13641	1.24768	0.753703	0.914864	0.501744	1.06916	0.805231	0.826897	1.63722	0.857936	0.614176	0.582479	1.52114	1.4347	0.714294	1.12938	0.443262	1.08211	1.04251	0.901272	0.94938	1.74596	0.337978	0.269695	1.70508	0.643805	0.944722	2.55221	1.20423	0.526521	1.02517	1.1952	1.56744	1.25909	1.51391	1.28474
UNSA-00230	D5_Good	0.523204	1.13805	1.44838	1.83776	1.29271	0.771085	2.52098	1.40347	1.04743	2.05487	3.12428	0.78482	0.573374	0.90369	0.668878	1.29344	0.760797	1.18935	1.29228	1.51514	1.27893	1.04882	1.70112	1.04588	1.16584	0.740045	1.5417	1.10648	1.31651	1.59033	1.50418		1.0234	1.02209	3.00424	0.552247	8.40294	0.805033	1.22256	1.0056	1.57629	1.23405	1.80316	1.45291	0.973386	0.542385	1.74026	0.881391
UNSA-00233	D5_Good	1.16584	0.656653	5.22734	1.924	5.45362	0.301337	4.67989	1.24568	1.10107	1.8959	1.85361	7.14962	1.41855	2.63629	1.70352	2.10008	3.7124	0.627892	0.845224	0.836243	1.31709	0.486198	2.82351	0.531473	0.532587	0.986184	7.58187	0.941188	10.3365	0.969154	3.25963	0.532292	2.59965	3.12389	3.01406	1.23196	0.228248	1.73996	1.95703	1.1166	1.16668	0.596338	8.02426	1.17411	1.25994	0.161272	0.633537	1.09652
UNSA-00235	D5_Good	1.67317	0.434401	23.7252	0.826904	2.58379	2.91009	2.18469	2.12223	0.312279	1.25579	0.856709	29.1302	5.31951	2.11673	0.717554	3.1906	7.24702	1.23317	1.96431	0.725163	0.90564	0.405249	3.47699	2.09249	0.713421	0.913168	0.57513	1.69669	1.26012	1.81223	1.60909	0.240078	2.80754	2.37066	3.11643	0.352578		3.31582	1.02452	3.37446	0.855362	0.337004	6.58877	1.02334	0.995074	2.63932	1.0076	0.557103
UNSA-00236	D5_Good	1.34047	0.506336	1.95528		1.68743	0.571032	0.935217	0.996589	1.24677	1.03751	1.01325	1.59704	0.920329	1.18112	0.922979	1.805	0.71978	1.26349	1.15363	1.56088	1.3073	1.49318	0.915537	1.29117	0.732772	0.780963	0.544968	0.490327	73.9573	1.53123	2.41046	1.74048	1.0638	1.54626	0.459785	1.70841	0.730961	0.706233	1.32465	1.21409	0.608527	0.790719	0.436807	1.02229	1.55063	0.4929	4.55018	1.09762
UNSA-00237	D5_Good	1.53933	1.57186	3.31749		0.935381	8.417	0.12041	1.26934	0.94659	1.99433	0.834398	2.08349	0.818997	1.80395	1.04076	1.35389	1.34664	1.26937	1.3545	1.74392	1.63758	1.23528	0.582908	0.979447	1.96045	1.15394	1.34019	1.18512	3.65637	1.67971	2.51191	0.466378	1.60043	0.923684	0.821556	1.07165	1.02788	0.818419	1.57173	1.24834	0.961049	0.854218	0.905337	0.739451	1.04427	1.67751	3.37074	1.22934
UNSA-00267	D5_Good	0.663462	2.34726	0.688716	1.0526	0.559424	1.24613	3.82517	1.64257	1.76283	0.770434	0.499827	0.415805	1.72109	0.74455	0.0782444	0.965566	0.92994	0.830969	0.390183	0.737273	0.906177	2.26079	2.95767	0.638952	1.86174	1.78871	0.0461637	0.974706	0.532399	1.24525	0.627075	3.98523	0.876773	0.114788	0.912334	1.62162	6.72264	0.83336	0.959705	0.632305	0.945971	2.84737	4.00789	3.35833	1.34207	0.273741	1.86912	1.02407
UNSA-00009	D5_Poor	24.6981	2.04837	7.51876	1.20015	1.65752	9.92421	6.35601	2.2686	1.15004	1.16642	1.39905	21.4351	3.14858	2.34938	3.19334	2.20132	5.63971	1.1059	8.21302	1.61536	1.03604	1.44835	5.80824	3.07839	0.663428	0.810364	3.89558	1.47085	0.22281	1.46224	0.978744	1.1187	3.40382	0.902732	1.6421	2.89693		1.86571	1.36892	1.77076	1.28627	0.407291	3.67345	0.715147	0.9152	86.8114	0.387398	1.5313
UNSA-00013	D5_Poor	0.916415	1.52037	1.66981	0.654639	1.22846	1.6018	1.99648		2.10326	1.71489	0.884829	0.29083	0.337483	1.60671	0.607134	0.699111	0.594405	0.892319	0.410514	1.93745	1.57566	1.42789	1.02975	0.623533	1.14169	1.02602	0.395241	1.05866	0.460538	1.12201	1.33533		0.666143	0.907502	0.652895	1.41055	2.11946	1.19445	1.07671	5.08224	1.20061		1.31551	1.21621	1.79575	0.135136	1.30956	1.82495
UNSA-00026	D5_Poor	0.371606	1.89853	0.497951	0.336531	0.898951		0.891902	0.973892	2.24741	2.36198	3.02705	0.802127	0.426733	0.509213	0.574631	0.64536	0.712368	0.732081		1.64216	1.13779	3.07361	0.202559	0.485783	0.60359	1.39528	0.68356	0.988266	0.288105	1.82802	1.13521		0.615451	0.452507	1.13934	7.494	1.33859	0.285536	3.88246	2.12626	0.980705	1.89102	0.807142	1.12457	1.35231	0.133067	1.06064	0.963971
UNSA-00043	D5_Poor	0.423549	0.736591	1.05088	0.536397	1.06391		0.16501	1.23717	1.15721	1.2562	2.02317	1.31367	0.719193	0.818019	0.884531	1.06824	0.711938	1.10851	0.667023	1.25823	1.12362	1.23246	0.437666	0.920992	0.830871	1.09858	1.81209	3.49637	1	0.986032	1.33171	1.47325	1.03262	0.509342	0.905016	1.38099	0.263937	0.68649	1.00316	1.03242	1	1.33024	1	1.24961	1.31984	0.215333	1.17026	0.763265
UNSA-00072	D5_Poor	1.23034	0.85787	0.630158	1.56057	0.369814	1.2512	0.335585	1.49382	0.849277	0.279626	0.74586	1.79098	1.21166	0.418101	0.582486	0.581343		1.16328	0.40034	0.281011	0.566232	1.197	0.307373	1.14502	1.88478	0.722467	1.03587	0.603987	5.02327	0.348701	1.22014	1.32611	0.712321	0.113754	0.725553	1.11129	0.911222	0.647373	0.803526	0.413591	0.871998		0.200219	0.493715	0.762816	10.4296	3.72586	0.777142
UNSA-00076	D5_Poor	1.62562	0.770293	1.72228	0.626875	1.03096	0.86089		0.645124	1.0666	0.571366	0.721672	0.797332	0.570548	1.05132	0.764111	0.906878	0.575443	0.949481	1.13961	0.704769	0.899534	1.21358	1.46298	0.589322	0.909988	0.941109	0.621033	1.02789	0.507648	0.908834	0.774878	0.839831	0.919554	1	0.770899	1.59902		0.515648	0.926807	0.428626	0.636817	0.987746	1.44893	0.618878	0.991372	1.02383	1.75738	0.776415
UNSA-00085	D5_Poor	0.492901	0.884682	2.38441	1.38592	2.29407	0.233975	4.76874	1.64441	2.85766	0.537571	0.556685	7.09378	1.81001	3.50373	2.91568	1.89627	2.4107	1.09516	1.73706	0.895113	1.43839	1.17254	2.40948	2.01176	1.7258	1.10231	2.10308	1	0.833153	1.32492	0.998141	0.191322	2.11783	1.14598	1.54411	1.20428	0.182638	2.11711	1.27038	1.08318	0.899369	0.565008	2.78023	1.83136	1.67297	0.409631	0.222028	0.997605
UNSA-00090	D5_Poor	0.915353	1.26561	1.09907	1.19417	1.2433	0.872649	0.777275	2.10234	0.611522	0.306808	0.650255	0.683096	0.608915	1.71322	1.49152	1.20992	0.938473	1.28541	1.10844	0.708463	2.02429	1.06939	0.518822	1.15179	1.50377	0.954614	1.49047	1.40637	0.250519	1.37215	1.206	1.27797	1.01856	1.43235	0.9395	0.61622	1.14334	1.42199	0.716193	1.50947	1.33911	2.4826	1.04173	1.74097	1.43367	9.73261	0.856431	1.04531
UNSA-00102	D5_Poor	0.563504	0.884332	0.672518	0.214352	0.588296	0.847044		0.396741	0.917609	1.03889	0.946219	0.326825	0.512962	0.770573	0.657696	0.614945	0.897378	1.13021		0.785223	1.04465	1.07704	0.453128	0.309846	0.263659	1.06791	0.512375	1.33263	1.83797	0.856115	0.902385	0.550798	0.850852	0.669642	1.05236	0.640485		0.291365		0.83913	0.598361	1.06574	0.770414	0.69773	1.51173	0.731438	3.45705	1.07251
UNSA-00190	D5_Poor	1.2602	0.648501	0.310168	0.740447	0.927646	2.74423	0.918298	1.33223	2.19088	0.394411	0.572465	0.439562	1.21754	1.7165	0.647638	0.764921	0.650568	0.98566	0.958872	0.997262	1.33307	0.549259	0.391402	0.705381	0.786301	0.676462	1.23441	0.660391	2.45235	1.4462	1.28336	1.17759	0.828788	1.11459	2.63681	1.21796	0.632261	0.720517	0.672108	0.863253	0.656461	1.02191	1.9934	0.578972	0.845329	2.44905	0.304764	0.784531
UNSA-00192	D5_Poor	0.446715	0.603765	1.14626	0.704996	0.956503	0.519674	0.264354	1.57305	1.31664	1.47459	2.23465	0.879383	0.775633	0.934712	1.21683	1.18122	0.867016	1.3107	1.07717	1.32468	1.23895	1.29412	0.645844	1.08841	1.32674	1.36212	1.38653	0.93805	1.53994	1.18179	1.90655	1.81745	1.09054	0.497898	2.48642	1.4053	0.653075	0.535904	1.36946	1.55044	0.98844	0.941758	1.16312	0.881411	1.48279	0.210688	0.663263	0.734059
UNSA-00193	D5_Poor	1.3684	0.76078	0.742786	0.754144	1.91379	0.89526	0.704277	2.29605	0.860034	0.301807	0.489031	4.599	1.17896	2.07461	1.75155	1.99561	1.86816	1.38239	2.05607	0.436694	0.887074	0.685266	3.36349	1.97276	1.15318	0.781215	0.591451	1.08544	0.151763	0.767931	1.40758	0.921155	1.65453	1.03749	1.74255	0.78225	0.673834	1.92084	0.595821	0.853452	1.68749	0.358967	2.5219	3.64917	1.11204	2.6512	0.418256	0.701974
UNSA-00196	D5_Poor	1.86206	0.408852	9.29595	2.80086	1.51281	9.29418	1.89481	1.10536	0.404391	1.686	2.41717	8.85727	2.54333	1.74743	0.950189	2.11832	2.81266	0.910322	1.67346	0.727389	1.15337	1.2492	4.48103	1.22638	0.764932	1.21139	0.214091	0.624311	12.2303	1.34096	0.877766	0.134517	1.64788	1.55165	1.30907	0.726862		1.78983	0.420958	1.16652	0.657363	0.516706	3.5732	0.555894	0.961833	2.40064	0.310272	0.571194
UNSA-00231	D5_Poor	0.830344	4.16967	1.9039	1.14825	3.24253	2.29574	0.928066	0.92776	0.150975	0.882502	0.59357	14.0761	0.884166	1.82719	1.07628	1.16874	1.04751	1.83509	1.01849	1.2614	1.18385	1.50792	0.66314	1.06256	0.988855	1.22576	0.831572	2.02912	0.50724	1.48204	0.461255	1.82657	1.24307	0.764473	0.761016	1.04026	0.646384	3.96273	1.30471	0.654374	1.62567	3.20992	1.40974	2.6532	2.25411	15.7475	1.88737	0.975635
UNSA-00232	D5_Poor	0.357706	1.5138	1.0753		0.737317	1.93075	0.330487	1.21472	1.77096	1.85256	2.51765	1.42686	1.18664	0.607419	2.65559	0.956401	1.62156	1.68386	0.496668	1.51515	1.19946	4.17558	0.145235	0.972892	1.0191	1.33447	0.117945	0.912583	4.34397	1.67424	1.31206	1.70329	0.884902	0.308214	1.11119	4.89282	4.39432	0.396536			0.841871	3.29993	0.693916	1.26736	1.73836	0.55116	1.36363	1.47305
UNSA-00234	D5_Poor	2.38957	2.11116	2.26366	0.989129	2.39326	0.48209	20.6577	2.19957	0.805027	0.928413	1.33724	10.1299	2.11188	1.63412	2.04022	1.87718	4.12078	2.09067	4.33771	0.582412	1.29248	1.67512	1.73075	3.61548	0.572805	1.15154	3.21734	1.58005	0.342186	1.35799	0.666171	1.78282	1.44167	0.81344	0.914666	4.12023	1.79867	13.3917	1.97486	0.262795	1.69155	3.03721	0.969259	2.54543	1.94344	20.4292	2.08588	1.22142
UNSA-00004	Discharge_Good	1.93171	1.12378	0.550928	0.851211	1.71196	1.43073	1.05506	0.907721	1.21045	0.334137	0.535525	2.53592	0.385539	0.454258	0.686739	0.723979	0.690951	0.775096	0.478236	0.390656	0.46533	0.702121	0.529326	1.02668	0.431228	0.653378	1.51473	0.597618	0.243956	0.619744	1.74142	0.517661	0.703143	0.087269	1.2183	1.22342		1.05001	0.752707	0.852607	1.22125	0.536279	0.34707	0.531946	0.63867	19.731	2.20963	0.586419
UNSA-00022	Discharge_Good	1.45543	1.01777	0.580193	0.622947	1.24434	2.3114	0.493852	1.63053	0.77741	0.750283	1.45493	3.47168	0.876558	1.83156	1.47224	1.46706	1.5674	0.9173	1.13573	0.605637	1.09448	0.466557	1.18981	1.34501	0.987792	0.791165	1.02505	0.895015	0.278651	0.754961	0.461576	0.85884	1.4205	0.28172	0.88127	0.787516		1.39761	0.635387	1.35305	1.25737		1.58607	8.01854	1.14978	3.69043	1.04109	0.977441
UNSA-00032	Discharge_Good	0.335403	2.05543	0.612774	0.596678	0.962366	1.91815	0.191389	1.16794	2.1734	0.654611	1.10145	0.796144	0.875343	0.991808	1.07766	0.648928	0.968941	0.946518	0.4145	1.4245	1.40242	3.02633	0.435158	0.674319	0.781858	2.30659	0.962632	3.21138	0.170881	1.47317	1.66464	0.108786	0.810868	0.763878	1.1429	1.28981	2.30567	1.2534	0.599184	1.12069	1.69645	7.85693	0.966939	16.6802	3.17069	0.973083	1.83895	1.56318
UNSA-00038	Discharge_Good	5.40024	0.980898	1.3045	0.787034	10.01	4.78431	3.42089	0.870519	1.12852	0.360405	0.391933	1.05378	0.712018	1.80619	1.76508	0.994042	1.06061	0.733642	0.421479	1.25179	1.31164	0.844193	2.11152	0.707869	0.420607	2.44235	0.453619	8.89418	0.112161	0.9445	1.00705		1.35626	0.390384	1.38924	0.939531	4.71826	1.73352	0.715407	3.79088	2.7521	0.761235	1.00454	9.31221	1.06308	4.14161	1.08608	1.20722
UNSA-00055	Discharge_Good	0.253218	0.828608	0.369386	0.80119	0.632973	1.44748	0.541881	0.487691	0.62947	0.796374	0.645701	0.546073	0.264604	0.316608	0.358025	0.48447		0.862273		0.885497	0.776036	0.979618	0.491362	0.480969	2.46747	0.718503	0.990984	1.98923	0.617182	0.678497	0.80784	0.380216	0.43897	0.280798	0.900004	0.430097	1.12425	0.258035		1.63549	0.973361	0.5619	0.62447	0.602744	0.567223	6.91433	2.00345	0.564509
UNSA-00060	Discharge_Good	1.5169	2.39519	11.4967	1.49296	20.5896	39.9993	91.1164	1.77205	3.8825	3.61924	1.17318	5.99276	1.06226	2.60305	1.21384	2.55865	5.44501	0.66313	1.67299	4.76619	0.677665	1.75381	4.25775	0.864924	0.839627	4.28632	0.537947	1.68252	3.0521	0.828255	0.979003	0.302726	3.9233	2.41394	1.65119	0.727683		7.53309	0.728128	3.18203	2.08552	7.48328	7.82297	36.7622	1.67364	6.06349	0.88339	0.771032
UNSA-00065	Discharge_Good	1.36625	0.592345	0.716253	0.710353	0.719467	0.330437	0.221602	0.898657	1	0.66212	1.94183	0.40819	0.27313	0.661755	0.511709	0.523217	0.310823	1.09369		0.715698	1.06207	1.66529	1.12476	0.532846	1.00998	1.02318	1.03048	0.740171	0.484973	0.646943	1.22464	1.15934	0.758677	0.4352	1.28119	1.20606	2.116	0.583173	0.703283	0.718842	0.706789		0.905875	0.509659	1.1114	0.505404	3.79029	0.776225
UNSA-00096	Discharge_Good	0.135548	1.4999	0.80508	0.717316	0.449201	2.01693	0.269138	1	2.00411	3.09508	2.40095	0.371268	0.548821	0.652335	1.02022	0.71635	0.716257	1.39671		2.50275	0.747515	2.9351	0.30406	0.645615	0.653372	1.21781	1.16398	1.15745	1.40328	1.26701	0.98412	0.643761	0.765491	0.978058	1.16444	3.32259		0.559331	1.65421	0.778359	1.21015	2.90694	0.731341	1.40593	1.28292	0.431093	1.60426	1.00239
UNSA-00108	Discharge_Good	1.31105	0.790477	1.81866	0.496049	0.726558	2.7479	0.19614	1.30498	1.21444	0.964076	1.77378	0.79343	1	1.0103	0.378939	0.925043	0.749521	1.07741	0.917168	1.19304	1.62244	0.94882	0.750327	0.602368	1.10505	1.18465	1.60992	1.07396	0.58804	1.08289	0.842699	1.24528	1.2774	0.561849	2.08326	0.817941		0.273832	0.683813	1.35156	1.04103	0.475258	0.963193	0.974754	1.81483	5.01181	0.863948	1.1095
UNSA-00201	Discharge_Good	0.615534	4.70593	10.4996	0.737159	35.7316	1.37579	29.983	1.85681	0.707631	1.75845	9.53043	5.90111	1.02626	2.3992	2.44892	3.31039	4.58079	0.73049	2.49994	1.29177	0.913715	1.02113	4.34621	1.77866	1.08973	2.23664	0.42714	2.29225	0.392493	1.11864	1.90532		2.69759	1.92578	2.26099	1.26521	1.93516	7.56693	0.745237	0.587891	2.73571	0.793065	11.703	36.0259	1.57306	6.10223	1.42534	0.916331
UNSA-00205	Discharge_Good	1.15031	1.55355	2.31113	3.21601	3.41119	0.911462	0.210685	2.74066	1.77213	1.88154	1.92124	2.22541	0.937096	1.03793	1.72601	1.31231	0.916017	1.35541	1.24698	1.28014	1.26241	2.16319	0.661507	1.30972	0.791122	1.0028	1.21458	1.19696	9.82198	1.25474	1.94237	1.6287	1.17844	2.43411	3.30353	2.5126	0.918092	0.564458	2.27567	1.3068	1.69718	1.89435	1.41631	0.9395	1.08681	2.30302	0.509899	0.706198
UNSA-00207	Discharge_Good	1.22105	1.61198	4.10626	1.32686	1.30796	3.72084	3.55866	1.05804	0.766882	1.60175	0.871603	10.8378	1.35503	3.71585	1.13291	1.42834	1.85857	0.678243	2.72083	1.16926	1.0295	1.00806	5.42284	0.943682	0.592877	1.54578	0.328396	1.05481	2.31688	1.14819	1.9303		2.98238	1.90975	2.47528	1.19638	0.649948	8.7807	0.734528	0.957135	0.890379	1.11241	10.1575	0.798015	0.806356	6.61647	0.427962	0.468595
UNSA-00208	Discharge_Good	1.11125	1.48396	1.10238	0.500925	1.8247	0.629443	0.62157	1.40216	2.41321	1.1749	1.38912	1.4526	1.66472	1.17041	2.82607	1.10208	1.07982	1.35597	1.44409	1.27253	1.16675	2.04053	0.777419	1.22594	0.798638	1.06954	0.783849	2.0497	0.629314	1.27832	2.66309	2.09794	1.18913	1.10082	3.87564	2.03964	1.66452	0.351051	1.18432	1.2957	1.61946	3.59242	1.10573	0.839561	1.66912	1.30181	0.531093	1.02433
UNSA-00211	Discharge_Good	0.158102	1.98115	0.784139	0.547608	1.50399	1.79748	0.408681	0.595937	1.68572	1.01087	3.415	0.811013	0.964826	0.904057	0.941671	0.901731	1.09037	1.07133	0.572451	0.967164	1.04604	2.67082	0.498449	0.948098	0.792203	1.40102	1.00518	0.659223	44.8701	1.40246	1.12209	1.93984	1.03117	1.04134	2.63212	2.60298	0.871238	0.939134	1.26003	0.681924	0.644422	1.31986	0.537493	1.85348	1.31802	3.91495	0.944149	0.620261
UNSA-00213	Discharge_Good	3.87077	1.24018	1.47832		1.67943	6.81717	4.12869	1.2534	0.852926	1.47563	1.94566	6.17083	2.28728	1.70675	1.76384	1.1585	1.57145	0.906837	1.79593	1.18422	1.0603	1.18872	1.32734	1.15804	0.630257	0.818777	0.664992	1.31093	8.80835	1.18102	1.26225	0.986388	1.57527	0.781271	0.683449	1.26538	0.680744	2.68215	0.954227	0.658112	0.798333	1.54475	1.08953	0.554107	1.32086	3.71427	1.20097	1.0414
UNSA-00215	Discharge_Good	0.145097	1.73435	0.544287	0.546875	0.997518	3.83145	0.201292	0.486715	1.72056	1.8754	4.20538	0.0776018	0.328068	0.733225	0.920758	0.524985	0.412464	1.41432	0.605547	1.67472	1.15709	1.87438	0.414932	0.501697	0.844764	1.67321	0.297593	0.975816	0.210793	1.49883	1.7845		0.873875	0.863867	0.484468	2.40126	0.799947	0.729994	1.13854	1.48757	1.55873	1.48211	0.571537	6.81831	0.966739	13.5729	1.49337	1.04133
UNSA-00216	Discharge_Good	1.15627	0.937096	0.476775	0.422167	1.05046	0.629987	0.175271	1.15262	2.03658	0.222024	1.46767	0.723828	0.812726	1.07838	0.893419	0.662826	0.844157	1.00428	1.18821	0.270543	1.00293	0.800482	0.400568	0.796406	0.733026	2.41228	0.144391	0.81458	0.177767	0.939716	3.35364	0.0785973	0.77252	0.233982	3.62701	1.107	2.89836	0.422625		0.809225	0.898775	1.49136	0.776423	0.599792	1.27339	1.47653	1.08978	0.770873
UNSA-00218	Discharge_Good	0.50063	0.855139	0.274971	0.312333	1.16897	2.03373	0.173501	0.619736	1.49316	0.53694	0.589606	0.540918	1.03435	0.609506	0.875891	0.883724	0.667918	1.01656	1.23221	0.984164	1.11908	1.44832	0.16468	0.507145	0.384927	1.09216	2.08582	0.818942	0.213702	1.06206	1.05082	1.08045	0.974205	1.82503	0.548228	2.01979	2.02751	0.191234	1.63824		1.41195	0.980716	1.87724	0.777018	1.33423	4.30428	1.29835	1.2161
UNSA-00220	Discharge_Good	0.496469	1.80916	0.543572	1.29054	0.853822	0.626969	0.17568	0.977829	2.22189	2.59523	3.39651	0.782409	0.465725	1.53286	0.861693	0.792831	0.933209	1.2101	0.636908	1.09868	1.23286	2.07732	0.487162	0.767185	0.654809	1.07738	0.591198	1.1925	2.74446	1.40298	1.4374		0.815989	0.792544	4.32659	1.93478	1.27307	0.940815	1.4695	0.659546	2.13481	1.78653	2.23077	8.62244	1.66182	0.219012		1.06051
UNSA-00221	Discharge_Good	1.22027	0.908975	1.66463	1.37402	0.198575	0.431626	0.146154	2.20581	1.2382	0.818265	0.823833	1.21018	1.16658	0.776711	0.69279	0.73335	0.87219	12.5572	1.08351	0.506755	1.03049	0.190094	0.52559	0.63945	1.11274	1.54026	0.784921	0.227745	2.98739	1.88129	2.70684	1.6136	0.88993	1.83694	3.75823	2.69182	1.70665	0.387972	1.72182	0.86303	0.348695	1.31946	0.677207	0.159144	1.27567	1.79884	0.869915	0.995112
UNSA-00222	Discharge_Good	1.7283	0.57871	0.552733	1.26937	0.866923	0.803466	0.251515	0.6224	1.19932	1.05433	1.46698	0.677357	0.687894	0.827618	0.57151	0.926166	0.651313	1.26823	1.57314	1.03491	1.22111	1.68317	0.38038	0.843847	0.674396	0.853791	0.385995	0.698364	3.58887	0.968184	2.02444	0.893674	0.740114	1.46177	2.05653	4.45525	0.790263	0.784417	2.64155	1.06137	0.871962	0.773841	0.505084	0.659895	1.00554	0.387056	0.711932	0.971629
UNSA-00238	Discharge_Good	0.948075	1.7156	0.530112	0.77772	1.46069	0.467583	1.52282	1.1213	2.29112	1.43939	0.700633	0.582405	0.553028	1.07445	0.114183	0.840787	0.972789	1.73542	0.362744	1.281	0.922566	2.4095	0.753688	0.573003	1.50616	1.07237	0.13239	1.34731	0.270263	1.4074	1.49235	1.32385	0.866343	0.422412	5.16482	1.47057	2.26771	0.680046	1.43479	0.83781	1.61299	2.10005	1.75855	5.79264	1.49634	0.952241	1.00422	0.669061
UNSA-00241	Discharge_Good	2.80651	1.55091	3.91899	1.38949	1.81854	0.590314	1.82941	2.33562	1.00208	1.05587	1.03403	2.752	0.71954	4.18907	0.732558	1.25389	2.10761	9.25934	1.02719	0.687168	1.0875	0.0851445	5.52202	2.89753	2.17452	1.38264	2.30297	0.822849	0.779586	1.3338	2.70924		1.26799	0.708521	4.47726	1.61479	4.92155	1.63333	2.1697	0.73698	1.66161	0.336796	0.883496	5.53201	1.1895	0.987517	0.11878	0.98346
UNSA-00242	Discharge_Good	1.12174	1.11011	0.855875	0.439269	0.451988	0.704478	0.210687	0.695256	0.692045	0.818037	0.651215	0.18955	0.364111	0.890747	2.00891	0.623764	0.639719	9.51855		0.353374	1.18727	0.0813261		0.518783	0.933519	0.686154	1.41583	0.954745	0.409779	0.926414	1.83856	1.20703	0.880639	2.23333	1.85101	0.597141	2.89449	0.400699	0.817764	2.43965	1.20269	0.918129	0.539652	0.39464	1.37521	3.45316	0.7058	1.07258
UNSA-00244	Discharge_Good	1.01515	0.764737	1.4771	1.2082	1.06554	14.8527	2.69605	1.92325	1.59681	0.632375	1.69143	1.79545	0.982981	1.09661	1.50911	1.22879	0.946204	1.11557	1.56763	0.766203	1.06665	1.74167	1.18815	0.963771	0.700504	1.09564	1.50069	1.14822	0.275662	1.36578	1.32755	1.60574	1.04876	0.563242	2.59611	2.01046		0.293902	1.76562	1.0443	1.58204	1.28073	1.36998	1.21959	0.976813	8.05209	0.611703	0.575769
UNSA-00246	Discharge_Good	1.11306	0.739519	5.4868		5.52289	0.489515	13.1361	1.34929	1.13771	2.26284	2.54824	9.8374	1.58771	2.21443	1.11512	2.12665	3.14324	0.72219	0.623286	1.22001	1.28669	0.558461	1.2302	0.559411		1.23856	10.8022	1.10077	27.1506	1.1378	2.48849	0.96399	2.88352	3.93968	0.509689	0.435449	0.26819	1.54488	1.19577	1.38063	0.941655	0.730132	9.03297		1.35431	0.267634	1.57948	1.02154
UNSA-00248	Discharge_Good	0.489388	2.61557	1.1909	0.906712	1.20151	3.45759	3.00647	1.20478	1.35427	1.97036	1.51264	0.635617	0.550503	1.76454	0.885763	1.10905	0.556975	1.45583	0.913859	1.31948	1.24242	1.32097	0.878913	1.39682	1.43545	2.03814	0.401054	2.3909	0.407275	1.51839	0.876137		1.00787	2.03187	4.34241	2.43111	2.89383	1.36417	2.19401	1.73235	3.70687	2.42621	1.42882	5.17252	1.39081	1.26435	0.749908	1.32396
UNSA-00252	Discharge_Good	1.46954	1.17581	7.32702	0.46886	1.44025	1.03619	0.313719	1.66158	3.38203	0.960407	0.989859	7.6623	1.98592	0.580225	2.25746	0.9719	2.46657	1.74031	1.02898	0.714657	0.446851	1.56781	0.887332	0.565754	0.525051	1.29674	0.327324	1.0835	0.807238	1.65701	1.37489	0.948292	2.1004	1.10008	0.29807	0.720072		0.277511	1.15112	2.09872	1.30106	1.61422	1.38694	0.714596	1.39662	3.41257	0.975934	0.597134
UNSA-00253	Discharge_Good	0.689433	0.72701	0.35466	1.12572	0.591376	0.914429	0.361883	0.729001	1.98837	1.12342	0.699121	0.593283	0.328936	0.582812	0.676998	0.626103	0.731681	1.22126	0.677659	1.3487	0.983699	1.84846	1.322	0.717252	1.23478	1.2206	0.0938072	0.635754	2.14729	1.3411	2.14101	1.49342	0.883414	1.08451	2.1114	2.06474	1.38541	0.378795	1.19602	1.28597	1.11662	1.38818	1.06177	1.10183	1.35277	1.53504	1.11646	0.685444
UNSA-00255	Discharge_Good	0.952549	0.834151	0.577396		0.550413	2.62921	0.898969	1.07011	2.19491	1.33373	1.68994	0.371538	0.769819	0.706073	0.842839	0.887823	0.789474	1.48052	0.478028	1.44009	1.33534	1.50027		0.752736	0.824119	1.62887		0.851421	6.30992	1.94339	3.93279	2.08097	0.911907	1.1184	0.438806	1.09247	0.943874	0.201925	1.45792	0.795459	0.786713	2.52606	1.36257	1.5653	0.986486	0.0881395	4.06425	1.23385
UNSA-00256	Discharge_Good	0.305484	2.51319	2.35504	1.64816	0.913568	0.753861	1.23938	1.13174	2.34981	2.06875	2.3934	3.43023	1.16464	1.43468	3.21537	1.48898	0.257896	1.10832	0.394655	1.365	0.566004	3.41653	3.13135	1.25311	0.857033	1.44404	0.59022	1.10626	1.90114	0.990734	1.3407		1.15117	1.6003	2.82448	9.66537	0.54298	1.04879	5.0416	1.16319	2.90121	2.99194	1.47138	3.61049	2.06283	0.321991	0.402585	1.36037
UNSA-00257	Discharge_Good	1.93529	1.29391	2.62421	1.15662	0.925999	2.50294	0.303684	2.63314	1.31864	1.96419	2.52463	1.00433	0.992389	1.65105	1.21223	1.04899	1.1343	1.12627	0.961817	1.30777	1.57115	1.82631	0.747706	1.04769	1.12269	1.91629	0.698684	1.46025	0.95254	1.68301	2.7421	0.824864	1.44416	0.885537	3.68527	2.17892	0.907789	1.30846	1.66758	0.62045	1.12859	0.903087	1.12704	1.20577	1.36653	8.81413	2.22249	1.26441
UNSA-00259	Discharge_Good	1.63185	1.38959	1.0053	0.927621	1.13022	0.67435	0.091829	2.77379	0.715967	1.70108	1.29696	1.5169	0.865002	0.81743	0.913941	0.829736	0.608961	1.326	0.716853	1.04501	1.59709	1.81337	0.839699	0.929785	0.821126	1.33438	1.45804	1.1964	2.55167	0.802623	1.15062	1.02373	1.13308	2.06084	3.61287	2.9519	0.818699	0.350402		0.549583	0.615358	1.41287	0.93388	2.60502	1.86338	0.263486	2.31753	0.905398
UNSA-00260	Discharge_Good	1.83985	0.862341	2.05818	1.06968	0.643727	0.91632	1.59996	0.701341	1.21281	1.25542	1.04091	0.484845	0.399433	1.62643	1.15508	0.925356	1.09885	17.9892	1.10893	0.655486	0.994759	0.167262	0.869051	1.49299	1.70832	0.610365	3.0404	0.39573	0.519938	1.39484	3.18625	1.90835	1.10112	2.15654	4.15811	1.23759	2.26676	1.19749	1.30448	2.45867	0.516004	1.83043	0.341811	0.436296	1.02151	0.405175	0.756036	1.30391
UNSA-00010	Discharge_Poor	2.21711	0.125538	0.838011	0.142925	0.220966	34.2223	1.01162	0.266461	0.213971	0.056864	0.448974	0.885038	0.0757147	0.0335277	0.27884	0.165421	0.48042		0.267656	0.0694475	0.0624572	0.197189	0.923379	0.300079		0.996486	0.243762	0.252263	0.143306	0.117487	0.926543	0.124211	0.758822		0.100157	1.19568			0.7303	0.371977	0.176655		0.198385	0.509017	0.136361	15.095	1.14249	0.308641
UNSA-00014	Discharge_Poor	0.253062	1.02641	0.469295	0.400304	1.02972	1.20873	0.24491	0.959142	1.3366	1.12932	9.93574	0.384878	0.322811	0.272045	0.31205	0.554331	0.32819	1.08216		1.86382	0.573154	1.17586	0.152789	0.335563	1	0.765507	1.29375	0.502347	0.899627	1.1497	1.96167	0.499361	0.426018	0.241435	0.805928	0.810743		0.245453	0.570749	1.0819	0.600465	1	0.774509	0.473519	0.560431	0.183379	0.846583	0.787244
UNSA-00044	Discharge_Poor	0.91196	1.76067	1.34244	1.3783	1.4006	0.311647	0.362565	1.36987	2.66305	0.784245	1.06148	1.28497	1.49092	1.02267	1.25061	1.54882	1.06617	0.972008	1.85968	0.934365	1.80056	3.26762	0.637923	1.11301	1.22949	1.80241	2.23212	4.61729	0.77181	1.40869	1.3907	1.38198	1.08797	1.38238	0.939061	3.7735		0.49774	2.12495	0.923663	1.32782	2.04871	1.22674	1.51435	1.68094	2.36676	0.817159	1.0555
UNSA-00077	Discharge_Poor	0.523381	1.11532	0.489205	0.427058	1.38705	0.960279	0.311236	0.729522	1.69453	2.3312	1.38784	0.373952	1.09875	0.752038	0.69152	0.633581	0.634622	1.17274	0.23826	1.87248	1.17552	2.30203	1.26206	0.629716	0.757146	1.4317	0.66047	1.35039	2.18527	0.75048	0.761753	0.608127	1.04652	0.418949	1.1129	2.32458		0.706721	1.33392	1.05109	1.28495	1.65065	1.1696	0.843645	1.18149	0.489088	1.17481	0.850861
UNSA-00086	Discharge_Poor	1.45614	1.13385	9.50639	1.80114	2.73244	0.611897	11.2342	1.20064	0.314129	1.10718	1.12955	10.9507	1.26382	1.27597	1.30727	1.40402	2.49985	0.676576	0.461238	0.708701	0.595725	0.304999	0.93581	0.897935	0.965994	0.770973	0.218922	1.20823	11.2574	0.490211	1.00829		3.02155	5.3486	0.389293	0.643015		0.637341		1.08118	1.25426		3.10121	1.07222	0.747463	0.734647	1.01407	0.460674
UNSA-00091	Discharge_Poor	0.82985	1.47159	1.94428	2.28092	1.96581	0.675257	0.60884	1.72069	1.89859	2.61094	2.79129	1.35326	2.023	1.70357	1.05479	1.33255	1.03882	1.66146	0.978099	2.22756	2.12661	2.50872	0.365078	0.861281	1.1215	1.28993	2.36157	1.50351	7.18955	1.49163	0.890079	2.19085	1.28992	1.08687	1.42132	2.5254	1.38012	0.59202	1.45709	5.50348	1.32879	4.88382	1.15249	1.12208	1.48602	3.77419	1.0258	1.42404
UNSA-00200	Discharge_Poor	0.84427	1.03748	0.581254		1.40251	0.911294	1.09192	1.409	1.89364	1.3727	2.52258	1.2847	1.42042	0.943924	0.726111	0.927015	0.554642	1.22649	0.825091	2.19257	1.33031	1.12891	0.177071	0.623846	1.38212	1.04825	2.30387	0.695125	4.67424	1.95949	1.91805	2.71045	0.77022	0.960299	0.666311	1.99265	0.519391	0.659987	0.835213	4.39037	1.24529	1.02741	1.04741	0.983897	1.26082	0.804247	2.03457	0.928135
UNSA-00202	Discharge_Poor	0.874952	0.667675	1.19497	0.958379	1.01386	0.76412	0.252637	1.44064	1.93471	0.841354	0.894672	0.908781	0.865417	0.93796	1.51143	1.39435	1.04408	1.36817	0.894776	0.977811	1.31829	2.79579	0.784678	1.03992	1.3617	1.06333	1.61722	0.951649	0.941829	1.38436	2.92729	1.4189	1.02634	0.545288	2.30341	2.67607	0.774923	0.35573	2.06141	1.83338	1.25287	1.45155	1.17415	1.34215	1.6892	2.028	1.26169	0.841046
UNSA-00203	Discharge_Poor	1.57417	0.543702	0.58491	0.655522	1.46227	2.12988	0.665603	2.56058	0.809303	0.767925	1.54847	2.68133	1.12008	1.81016	1.87593	1.73855	1.63472	1.55256	1.6597	0.529722	1.11903	0.663216	2.60838	1.70175	1.30105	0.955091	0.951499	1.06412	0.268044	0.83687	0.766888	1.16391	1.49202	0.739633	2.07127	0.685147	1.08517	1.01265	0.931239	0.782573	1.26896	0.421126	1.77736	9.93214	1.34142	3.94295	0.556941	0.868395
UNSA-00204	Discharge_Poor	1.21307	2.12283	1.06076	0.0558588	1.77301	0.984775	0.577968	2.99182	0.893337	1.13786	1.9733	1.72136	1.16379	0.75432	1.10939	1.02933	1.24823	1.10547	0.79262	1.1244	1.65803	1.86074	0.18951	0.836316	1.17314	1.3058	0.180511	1.65559	2.35331	1.0811	0.758051	2.54546	1.14907	0.505166	0.628069	0.98653	4.79928	1.3856		1.19483	1.28462	10.72	1.38575	4.85172	1.99304	3.83127	3.98965	1.2984
UNSA-00206	Discharge_Poor	0.526596	0.845465	2.12169	1.00428	1.22689	0.74056	0.171004	2.0752	1.75668	1.28093	1.54475	1.95051	1.60933	1.29119	0.776349	1.02026	1.22882	1.54643	1.62313	2.11843	1.49497	1.52329	0.287556	1.21082	0.789764	1.53929	3.69706	0.920594	1.69658	1.41899	1.42095	1.68725	1.1889	1.40711	1.50994	1.4754	0.737276	0.837608	1.77358	2.39027	1.15061	1.83784	2.50596	0.53091	1.48385	0.663585	1.80105	1.42129
UNSA-00209	Discharge_Poor	0.972647	0.372847	0.781939	0.433591	0.544521	1.23515	0.734091	0.862184	1.17937	0.165262	0.204725	0.454916	0.575925	0.585958	0.700527	0.725867	0.462354	1.0142	0.689672	0.380424	0.9363	0.975148	0.231089	0.573299	0.742662	0.95782	0.320738	0.487883	0.170389	0.737008	1.26678	1.09301	0.847754	0.370832	0.139443	1.35642	1.82907	0.370836	0.662134	0.680419	0.836734	0.987656	0.899369	1.16231	1.7412	3.40163	2.88562	1.41968
UNSA-00210	Discharge_Poor	0.892957	0.532277	2.59251	0.470444	1.1856	0.43231	0.21273	1.12509	1.92297	0.952547	0.771748	1.1265	0.489917	1.98269	1.14961	1.04818	1.93938	19.1452	1.63263	0.641523	1.04844	0.12322	4.21611	1.50936	1.27104	0.546147	0.444555	0.420662	2.87831	1.35272	1.83522	0.288644	1.68353	1.928	4.9342	1.39168	1.35438	0.76702	1.69908	0.598768	0.500018	0.762627	1.76031	0.286932	1.10273	0.0539244	0.929682	1.01068
UNSA-00212	Discharge_Poor	0.411286	1.31251	0.939575	1.22708	0.731547	4.7356	0.167712	0.899744	0.915185	1.13862	1.55755	0.203329	0.48457	0.450158	0.886805	0.809091	0.677962	1.39458	0.62498	1.34474	1.14997	1.59476	0.351322	0.776378	0.538089	0.437837	0.406807	1.20407	5.45601	1.5612	2.30221	0.330686	1.04752	1.23285	4.86253	1.40699	5.29413	0.413575	0.670305	1.80168	1.6289	1.28977	0.898086	1.40701	2.06064	2.69289	3.54229	1.03782
UNSA-00214	Discharge_Poor	1.2794	0.402159	11.0469		1.01953	4.84759	1.20175	2.06561	0.750813	1.31187	1.71928	9.04009	1.83412	0.980483	1.56924	1.33412	2.23588	1.07359	1.50083	0.732781	0.954857	1.88306	1.76669	0.761159	0.378035	0.751342	0.459626	0.55267	10.1507	1.08488	1.04282	0.488562	1.24753	1.13029	0.267268	1.66727		0.930423	1.71564	1.12213	0.644744	0.527135	2.64828	0.521898	0.853729	1.06773	1.3838	0.617412
UNSA-00217	Discharge_Poor	0.677926	0.639514	0.951304		0.810572	1.17681	0.184633	1.17303	0.836093	0.466256	0.979118	1.08175	0.382289	1.19666	0.982923	0.886411	0.880101	20.6863	1.09387	0.442383	0.674674	0.21861		0.409859	0.538318	0.619494	0.745529	0.365802	2.23804	0.822976	3.11674	1.44636	0.9309	1.43499	0.520685	1.78005	0.509598	0.761811	1.57796	0.375904	0.4656	1.80414	0.837689	0.0383014	0.580379	0.187275	0.217456	0.741625
UNSA-00219	Discharge_Poor	0.541265	1.06192	0.705441	0.561455	0.574481	1.28833	0.384656	0.931537	1.39402	1.9012	1.46567	0.407503	0.331306	0.578541	0.600152	0.642028	0.43736	1.13058	1.02873	1.7728	1.69079	1.51418	0.405285	0.879613	0.706871	1.9196	0.0539658	0.970802	0.258421	1.22624	1.14972		0.785809	0.172499	0.271265	1.13723	2.5352	0.740581	1.5093	1.07752	0.715535	7.12645	0.899938	2.16397	1.08331	1.46844	3.55742	1.40992
UNSA-00223	Discharge_Poor	0.349092	2.21316	0.57413	0.259336	0.227382	18.2537	2.8193	1.90295	2.76996	1.74417	9.4384	0.166349	0.351887	1.17932	0.797493	0.606804		192.416		0.392396	0.25487	0.744696	0.209353	0.695591	0.309252	1.21908	0.22113	0.681228	0.224094	1.02473	2.73833	3.09282	0.931252	45.9908	0.162386	5.39069			3.75346	0.51871	1.82396	2.54417	0.223718	0.295661	1.40587	7.68505	0.797977	1.62416
UNSA-00239	Discharge_Poor	1.03929	0.841329	2.50399	0.472417	0.718347	3.0348	1.0166	2.70847	0.910653	0.99736	1.0151	1.97111	1.48357	1.17208	1.33298	1.3023	1.55424	26.4411	2.93462	0.825181	0.594571	0.343087	0.862415	0.436491	1.77353	1.34961	0.623644	0.42183	0.212908	1.23471	3.51514	2.05251	1.36217	0.324483	0.884477	5.00201		1.25467	3.28872	1.37476	0.919742	1.82724	1.1974	0.122838	1.00182	20.9226	0.523188	1.05457
UNSA-00240	Discharge_Poor	0.586761	5.92795	1.41251	1.16267	1.9273	6.11399	0.541423	1.44266	1.00046	0.550396	0.575505	5.82245	0.642631	1.4234	1.10972	0.794878	0.623816	1.62945	0.956268	0.920832	1.22551	2.22815	0.252768	0.778616	1.18378	0.609666	1.57576	1.90827	0.524697	1.29876	0.39734	0.769799	1.04824	1.16221	4.10632	4.2663	0.479568	1.42028	2.27327	0.554195	1.76703	3.35282	0.812011	1.33589	1.9245	6.81543	0.752808	0.626226
UNSA-00243	Discharge_Poor	0.258175	0.988973	0.894722	1.38802	0.75759	1.15854	0.433698	2.4208	2.00699	0.636236	0.773096	0.804129	0.68071	0.50462	0.445499	0.832847	0.790184	0.964746	0.477307	0.446465	0.78405	1.68171	0.799527	0.915345	1.44017	1.36057	0.646981	0.901915	1.97577	0.651974	1.16795	1.96441	0.720499	1.04156	0.518592	1.97779	1.26948	0.612748	1.33246	0.321762	1.20668	2.5684	1.28098	0.840625	1.23768	0.366281	0.749431	1.16621
UNSA-00245	Discharge_Poor	0.285811	0.955896	0.523673	1.0638	0.538882	1.35538	0.438658	0.84949	1.11734	1.46538	1.77762	0.677786	0.69654	0.388745	2.16374	0.654115	1.17679	1.2998	0.839488	0.905469	1.11234	2.81737	0.24638	0.834128	0.548927	1.04868	0.490094	0.678764	1.68363	1.1549	0.991856	1.19781	0.777595	0.57358	1.01919	5.15725	5.22794	0.359219	3.08598		0.623723	1.51298	0.579116	1.17484	1.12529	0.58087	1.29193	1.12913
UNSA-00247	Discharge_Poor	1.45637	1.16476	0.71542	2.41007	1.31534	0.806523	0.407998	1.78291	1.57744	2.18487	0.861382	0.781203	0.724769	1.03942	0.82816	1.05834	0.908937	1.29074	1.59817	1.78456	1.129	1.87986	1.67282	1.03023	1.99716	0.967775	0.209197	1.49386	8.83585	1.39856	1.17749	2.16243	1.23779	2.4753	3.20072	1.92713	1.97326	0.371508	1.98877	0.839551	1.42969	1.79816	1.32938	1.68551	1.29991	2.27703	0.434829	0.926778
UNSA-00249	Discharge_Poor	0.943417	0.526931	3.33182	0.528929	0.639094	1.52591	0.168239	4.19597	1.12573	0.714061	1.11021	1.6608	0.900163	1.2581	0.995951	1.3635	0.942474	7.22954	1.84427	0.389984	0.768392	0.25801	0.972471	0.767023	1.18847	1.32189	1.27725	0.431669	0.416009	1.23263	5.16014	2.60053	1.02908	2.06661	0.779547	0.814236	0.879614	0.80215	0.878858	0.439184	0.389904	1.4106	1.36487		1.39834	1.25506	0.830016	1.4094
UNSA-00250	Discharge_Poor	0.697584	1.28681	1.02718	0.87348	1.46623	0.918604	0.556833	1.63135	1.46808	0.834106	0.463702	1.38187	0.781607	1.2376	1.02131	1.18847	1.64275	1.23863	0.79681	1.0719	1.16163	1.60926	0.36826	0.719686	0.687162	1.29489	0.524401	0.964084	0.285213	1.46683	1.61981	1.28763	1.21374	0.413332	1.00059	2.51854	1.99469	1.88607	1.69895	0.578261	0.836605	2.3698	1.50786		1.56436	5.47179	1.51193	1.77766
UNSA-00251	Discharge_Poor	2.55345	1.22425	1.41533	0.703731	1.78827	3.20503	10.5794	6.38901	1.63756	0.570781	0.690821	6.93056	3.11346	1.07773	3.09627	1.4382	1.41094	1.82354	1.54492	0.585846	1.02331	2.83567	1.30058	2.45858	0.239981	1.00068	2.10514	1.6107	0.193367	1.18284	0.798804	1.68434	1.04049	0.909602	2.00028	4.49588	1.17726	1.02001	2.4233	0.769994	2.00117	2.84327	1.37869	2.92504	1.47979	13.4842	0.8327	0.725541
UNSA-00254	Discharge_Poor	2.82559	0.802267	1.00825	0.945009	0.732362	2.43164	0.652921	1.88002	0.462562	0.827098	0.55227	0.541864	0.712181	1.04044	1.33973	0.906247	0.53353	6.1466	1.69773	0.757245	0.989429	0.0868147	2.27922	0.739868	1.56588	0.893673	2.5919	0.738257	0.788639	1.13458	2.01796	1.8592	0.924428	4.23581	0.706677	0.663094	5.87508	0.758492	0.356208	0.676954	1.25846	0.957595	0.486444	3.1873	2.19949	4.79142	0.949493	1.79979
UNSA-00258	Discharge_Poor	0.941178	0.680043	0.62204	0.183251	0.314042	8.5226	0.777281	6.01372	1.65343	1.18782	1.63269	1.2026	0.975311	1.16255	2.15539	0.799452	1.71671	35.7943	2.85111	0.468136	0.539182	0.197946	2.27191	0.718049	0.438563	0.569258	6.32726	0.675294	0.233021	1.27541	3.59702	0.747401	0.914469	1.44745	2.36781	2.853	0.438458	0.432975	1.79029	1.06956	0.543371	0.749339	0.435594	0.960157	0.813667	24.3897	0.515464	0.224854
UNSA-00261	Discharge_Poor	0.221032	0.83125	0.618693	0.829614	0.694298	5.46817	1.48208	2.86686	1.34065	0.344111	0.820179	1.06736	0.989285	1.13143	0.959966	1.13478	0.647602	1.22574	1.05429	0.762436	1.31182	0.923803	0.948196	0.951257	1.05143	1.06225	1.66281	0.929523	0.233623	1.47927	2.29651		1.20455	1.24618	3.98204	0.602212		0.624188	0.931754	0.580232	1.14452	1.13816	0.686666	1.84383	1.52393	2.97844	1.80293	0.934067
UNSA-00262	Discharge_Poor	1.40687	0.803977	7.91297	0.170461	2.06484	7.38043	1.97413	1.95294	0.576913	1.18226	1.27527	10.7852	1.07388	1.18868	3.49216	2.03271	3.21747	24.4477	2.57954	0.433663	0.296901	0.103769	3.12533	1.6745	0.995325	1.47291	1.24843	0.586114	1.97834	1.45976	3.49188	1.30727	2.53744	4.1427	0.800039	1.58263	1.88732	1.18351	1.4859	1.74378	0.882424	0.579993	2.7493	0.313972	0.675168	0.629548	0.895932	0.60192
[truncated: 861 more columns]

## Sheet: Patients_Demographics
PARENT_SAMPLE_NAME	CLIENT_IDENTIFIER	GROUP_ID	GENDER	RACE_ETHNICITY
UNSA-00002	FS02489129	D1_Good	female	white
UNSA-00007	FS02489115	D1_Good	male	white
UNSA-00015	FS02489109	D1_Good	male	white
UNSA-00016	FS02489141	D1_Good	male	black
UNSA-00018	FS02489134	D1_Good	male	black
UNSA-00020	FS02489135	D1_Good	male	black
UNSA-00023	FS02489104	D1_Good	female	white
UNSA-00024	FS02489184	D1_Good	male	white
UNSA-00028	FS02488765	D1_Good	female	white
UNSA-00030	FS02489153	D1_Good	male	black
UNSA-00034	FS02489162	D1_Good	female	white
UNSA-00036	FS02489171	D1_Good	female	black
UNSA-00039	FS02489108	D1_Good	female	white
UNSA-00040	FS02489117	D1_Good	male	white
UNSA-00041	FS02489149	D1_Good	male	white
UNSA-00046	FS02489142	D1_Good	male	white
UNSA-00048	FS02489167	D1_Good	male	black
UNSA-00052	FS02488774	D1_Good	male	white
UNSA-00056	FS02489177	D1_Good	female	black
UNSA-00058	FS02489130	D1_Good	female	white
UNSA-00063	FS02489116	D1_Good	female	white
UNSA-00067	FS02489125	D1_Good	male	white
UNSA-00068	FS02489157	D1_Good	male	white
UNSA-00070	FS02489150	D1_Good	female	black
UNSA-00074	FS02489159	D1_Good	female	white
UNSA-00079	FS02488734	D1_Good	female	white
UNSA-00080	FS02488742	D1_Good	female	white
UNSA-00087	FS02489098	D1_Good	male	black
UNSA-00093	FS02489163	D1_Good	male	black
UNSA-00094	FS02489148	D1_Good	female	white
UNSA-00097	FS02489101	D1_Good	female	white
UNSA-00098	FS02489133	D1_Good	female	white
UNSA-00104	FS02489111	D1_Good	female	white
UNSA-00106	FS02489144	D1_Good	male	black
UNSA-00109	FS02489176	D1_Good	male	white
UNSA-00001	FS02489089	D1_Poor	male	white
UNSA-00005	FS02489090	D1_Poor	male	black
UNSA-00006	FS02489154	D1_Poor	male	black
UNSA-00008	FS02489123	D1_Poor	male	black
UNSA-00011	FS02489100	D1_Poor	female	white
UNSA-00012	FS02489172	D1_Poor	male	white
UNSA-00017	FS02489102	D1_Poor	female	white
UNSA-00019	FS02489119	D1_Poor	female	white
UNSA-00025	FS02488773	D1_Poor	female	white
UNSA-00029	FS02489121	D1_Poor	male	black
UNSA-00033	FS02489106	D1_Poor	male	black
UNSA-00035	FS02489147	D1_Poor	female	black
UNSA-00042	FS02489173	D1_Poor	male	white
UNSA-00045	FS02489110	D1_Poor	male	white
UNSA-00047	FS02489127	D1_Poor	female	white
UNSA-00051	FS02489112	D1_Poor	female	white
UNSA-00053	FS02488766	D1_Poor	male	black
UNSA-00057	FS02489114	D1_Poor	male	white
UNSA-00061	FS02489170	D1_Poor	female	black
UNSA-00062	FS02489155	D1_Poor	male	white
UNSA-00066	FS02489140	D1_Poor	male	black
UNSA-00069	FS02489118	D1_Poor	male	white
UNSA-00071	FS02489158	D1_Poor	female	white
UNSA-00075	FS02489120	D1_Poor	female	white
UNSA-00078	FS02489168	D1_Poor	female	white
UNSA-00081	FS02488781	D1_Poor	female	white
UNSA-00084	FS02489097	D1_Poor	male	black
UNSA-00088	FS02489122	D1_Poor	male	white
UNSA-00089	FS02489178	D1_Poor	female	white
UNSA-00092	FS02489107	D1_Poor	male	white
UNSA-00099	FS02489165	D1_Poor	female	white
UNSA-00100	FS02489126	D1_Poor	female	white
UNSA-00101	FS02489182	D1_Poor	female	black
UNSA-00105	FS02489096	D1_Poor	female	white
UNSA-00110	FS02488776	D1_Poor	male	white
UNSA-00003	FS02489137	D5_Good	female	white
UNSA-00021	FS02489143	D5_Good	male	black
UNSA-00031	FS02489161	D5_Good	male	black
UNSA-00037	FS02489179	D5_Good	female	black
UNSA-00049	FS02489175	D5_Good	male	black
UNSA-00054	FS02488750	D5_Good	female	white
UNSA-00059	FS02489138	D5_Good	female	white
UNSA-00064	FS02489124	D5_Good	female	white
UNSA-00095	FS02489156	D5_Good	female	white
UNSA-00107	FS02489152	D5_Good	male	black
UNSA-00191	FS29242996	D5_Good	male	white
UNSA-00194	FS29243007	D5_Good	female	white
UNSA-00195	FS29243036	D5_Good	female	white
UNSA-00197	FS29243043	D5_Good	male	black
UNSA-00198	FS29243045	D5_Good	male	white
UNSA-00199	FS29243070	D5_Good	male	white
UNSA-00229	FS29243011	D5_Good	male	white
UNSA-00230	FS29243020	D5_Good	male	white
UNSA-00233	FS29243026	D5_Good	male	black
UNSA-00235	FS29243052	D5_Good	male	black
UNSA-00236	FS29243055	D5_Good	female	white
UNSA-00237	FS29243061	D5_Good	female	black
UNSA-00267	FS29243086	D5_Good	male	white
UNSA-00009	FS02489131	D5_Poor	male	black
UNSA-00013	FS02489180	D5_Poor	male	white
UNSA-00026	FS02488710	D5_Poor	female	white
UNSA-00043	FS02489181	D5_Poor	male	white
UNSA-00072	FS02489166	D5_Poor	female	white
UNSA-00076	FS02489128	D5_Poor	female	white
UNSA-00082	FS02488727	D5_Poor	female	white
UNSA-00085	FS02489105	D5_Poor	male	black
UNSA-00090	FS02489091	D5_Poor	female	white
UNSA-00102	FS02489095	D5_Poor	female	black
UNSA-00190	FS29242994	D5_Poor	male	white
UNSA-00192	FS29242997	D5_Poor	female	white
UNSA-00193	FS29242998	D5_Poor	female	white
UNSA-00196	FS29243039	D5_Poor	male	black
UNSA-00231	FS29243021	D5_Poor	female	white
UNSA-00232	FS29243023	D5_Poor	male	white
UNSA-00234	FS29243046	D5_Poor	female	white
UNSA-00004	FS02489145	Discharge_Good	female	white
UNSA-00022	FS02489151	Discharge_Good	male	black
UNSA-00032	FS02489169	Discharge_Good	male	black
UNSA-00038	FS02489092	Discharge_Good	female	black
UNSA-00050	FS02489183	Discharge_Good	male	black
UNSA-00055	FS02488757	Discharge_Good	female	white
UNSA-00060	FS02489146	Discharge_Good	female	white
UNSA-00065	FS02489132	Discharge_Good	female	white
UNSA-00096	FS02489164	Discharge_Good	female	white
UNSA-00108	FS02489160	Discharge_Good	male	black
UNSA-00201	FS29243004	Discharge_Good	male	white
UNSA-00205	FS29243012	Discharge_Good	male	white
UNSA-00207	FS29243014	Discharge_Good	female	white
UNSA-00208	FS29243015	Discharge_Good	female	white
UNSA-00211	FS29243030	Discharge_Good	female	white
UNSA-00213	FS29243044	Discharge_Good	female	white
UNSA-00215	FS29243051	Discharge_Good	male	black
UNSA-00216	FS29243053	Discharge_Good	male	white
UNSA-00218	FS29243062	Discharge_Good	male	white
UNSA-00220	FS29243076	Discharge_Good	male	white
UNSA-00221	FS29243077	Discharge_Good	female	white
UNSA-00222	FS29243078	Discharge_Good	male	white
UNSA-00238	FS29242999	Discharge_Good	male	white
UNSA-00241	FS29243018	Discharge_Good	female	black
UNSA-00242	FS29243019	Discharge_Good	male	white
UNSA-00244	FS29243028	Discharge_Good	male	white
UNSA-00246	FS29243034	Discharge_Good	male	black
UNSA-00248	FS29243037	Discharge_Good	male	black
UNSA-00252	FS29243060	Discharge_Good	male	black
UNSA-00253	FS29243063	Discharge_Good	female	white
UNSA-00255	FS29243067	Discharge_Good	female	white
UNSA-00256	FS29243068	Discharge_Good	male	white
UNSA-00257	FS29243069	Discharge_Good	female	black
UNSA-00259	FS29243082	Discharge_Good	female	white
UNSA-00260	FS29243083	Discharge_Good	female	white
UNSA-00010	FS02489139	Discharge_Poor	male	black
UNSA-00014	FS02489093	Discharge_Poor	male	white
UNSA-00027	FS02488790	Discharge_Poor	female	white
UNSA-00044	FS02489094	Discharge_Poor	male	white
UNSA-00073	FS02489174	Discharge_Poor	female	white
UNSA-00077	FS02489136	Discharge_Poor	female	white
UNSA-00083	FS02488741	Discharge_Poor	female	white
UNSA-00086	FS02489113	Discharge_Poor	male	black
UNSA-00091	FS02489099	Discharge_Poor	female	white
UNSA-00103	FS02489103	Discharge_Poor	female	black
UNSA-00200	FS29243002	Discharge_Poor	male	white
UNSA-00202	FS29243005	Discharge_Poor	female	white
UNSA-00203	FS29243006	Discharge_Poor	female	white
UNSA-00204	FS29243010	Discharge_Poor	male	black
UNSA-00206	FS29243013	Discharge_Poor	male	white
UNSA-00209	FS29243017	Discharge_Poor	female	black
UNSA-00210	FS29243027	Discharge_Poor	female	black
UNSA-00212	FS29243042	Discharge_Poor	male	black
UNSA-00214	FS29243047	Discharge_Poor	male	black
UNSA-00217	FS29243059	Discharge_Poor	female	white
UNSA-00219	FS29243074	Discharge_Poor	male	black
UNSA-00223	FS29243081	Discharge_Poor	male	white
UNSA-00239	FS29243003	Discharge_Poor	male	white
UNSA-00240	FS29243009	Discharge_Poor	female	white
UNSA-00243	FS29243022	Discharge_Poor	female	white
UNSA-00245	FS29243031	Discharge_Poor	male	white
UNSA-00247	FS29243035	Discharge_Poor	male	white
UNSA-00249	FS29243038	Discharge_Poor	female	white
UNSA-00250	FS29243050	Discharge_Poor	male	black
UNSA-00251	FS29243054	Discharge_Poor	female	white
UNSA-00254	FS29243066	Discharge_Poor	male	white
UNSA-00258	FS29243075	Discharge_Poor	male	black
UNSA-00261	FS29243084	Discharge_Poor	female	white
UNSA-00262	FS29243085	Discharge_Poor	female	white

## Sheet: Meta_Data
PARENT_SAMPLE_NAME	Sample	Label	PAT_ID	gender	bmi	age	APACHE_PULSE	APACHE_MAP	APACHE_RESP	APACHE_PACO2	APACHE_PAO2	APACHE_FIO2	apache_score	AIDS	DEMENTIA	Stroke	NEUROLOGIC	CHRONIC	ASTHMA	EMPHYSEMA	PRIORARDS	SINGLELUNG	DOUBLELUNG	UPPER GI DISEASE	PEPTIC	VISUAL	HEARING	ALCOHOL USE DISORDER	DRUG	PAST DRUG	DRUG REHAB	PSYCHIATRIC	DEPRESSION	ANXIETY	KIDNEY DISEASE	LIVER DISEASE	CHF	MI	ANGINA	CAD	PVD	HEMIPLEGIA	OSTEOPOROSIS	RHEUMATOLOGIC	ARTHRITIS	DISC	TUMOR	LEUKEMIA	LYMPHOMA
UNSA-00002	FS02489129	Good	1159	1	47.97	46	81	51	18	40	109	0.7	76	0	0	0	0	0	0	0	0	0	0	1	1	0	0	0	0	0	0	0	0	0	0	1	0	0	0	0	0	0	0	0	0	0	0	0	0
UNSA-00007	FS02489115	Good	3809	2	19.36	64	87	91	20	81	169	0.99	54	0	0	0	0	1	0	1	1	0	0	0	0	0	0	0	0	0	0	1	1	1	0	0	0	0	0	0	0	0	0	0	0	1	0	0	0
UNSA-00015	FS02489109	Good	5478	2	35.16	74	72	65	20	47	122	0.6	84	0	0	0	0	1	0	1	0	0	0	0	0	0	0	0	0	0	0	0	0	0	1	0	1	0	0	1	0	0	0	0	0	0	0	0	0
UNSA-00016	FS02489141	Good	5993	2	48.76	26	141	127	23	45	135	1	106	0	0	0	0	0	0	0	1	0	0	0	0	0	0	0	0	0	0	0	0	0	1	0	0	0	0	0	0	0	0	1	0	0	0	0	0
UNSA-00018	FS02489134	Good	7236	2	43.34	53	76	103	20	47	98	0.4	43	0	0	0	0	1	1	0	0	0	0	0	0	0	0	0	0	0	0	0	0	0	0	0	0	0	0	0	0	0	0	0	0	0	0	0	0
UNSA-00020	FS02489135	Good	8739	2	25.39	68	124	48	28	36	179	0.4	79	0	0	0	0	1	0	0	0	0	0	0	0	0	0	0	0	0	0	0	0	0	1	0	1	0	0	1	0	0	0	0	0	0	0	0	0
UNSA-00023	FS02489104	Good	9341	1	29.05	71	51	59	16	34	58	0.4	81	0	0	0	0	0	0	0	0	0	0	0	0	0	0	0	1	1	0	0	0	0	0	0	0	0	0	1	0	0	0	0	0	0	0	0	0
UNSA-00024	FS02489184	Good	11103	2	25.22	62	118	39	36	38.7	91.4	0.4	72	0	0	0	0	1	0	1	0	0	0	0	0	0	0	0	0	0	0	0	0	0	0	1	0	0	0	0	0	0	0	0	1	0	0	0	0
UNSA-00028	FS02488765	Good	11863	1	22.1	70	99	67	24	32	83	0.4	62	0	1	0	0	0	0	0	0	0	0	0	0	0	0	0	0	0	0	0	0	0	0	0	0	0	0	0	0	0	0	1	1	0	0	0	0
UNSA-00030	FS02489153	Good	1202	2	26.56	55	142	62	32	89.2	137	0.6	62	0	0	0	0	1	0	1	0	0	0	0	0	0	0	0	0	0	0	0	0	0	0	0	0	0	0	0	0	0	0	0	0	0	0	0	0
UNSA-00034	FS02489162	Good	2869	1	26.64	69	110	116	32	25.3	52.4	0.4	60	0	0	0	0	1	0	1	0	0	0	0	0	0	0	0	0	0	0	0	0	0	1	0	1	1	0	1	0	0	0	0	0	0	0	0	0
UNSA-00036	FS02489171	Good	4199	1	32.08	70	157	114	24	58.7	95.8	0.4	50	0	0	0	0	1	0	1	0	0	0	0	0	0	0	0	0	0	0	1	0	0	0	0	0	0	0	0	0	0	0	0	0	0	0	0	0
UNSA-00040	FS02489117	Good	5579	2	28.52	73	55	50	21	28	116	0.4	90	0	0	0	0	0	0	0	0	0	0	0	0	0	0	0	0	0	0	0	0	0	0	0	0	0	0	0	0	0	0	0	0	0	0	0	0
UNSA-00041	FS02489149	Good	6283	2	31.53	76	119	55	18	34	70.5	0.5	112	0	0	1	0	1	0	0	0	0	0	0	0	0	0	0	0	0	0	0	0	0	1	0	0	1	0	1	0	0	0	0	0	0	0	0	0
UNSA-00046	FS02489142	Good	7451	2	30.83	53	115	58	34	44	153	0.4	57	0	0	0	0	1	0	1	1	0	0	1	0	0	0	0	0	0	0	1	1	1	0	0	0	0	0	0	0	0	0	0	0	0	0	0	0
UNSA-00052	FS02488774	Good	11389	2	44.89	60	91	98	33	46	74	1	70	0	0	0	0	0	0	0	0	0	0	0	0	0	0	0	0	0	0	0	0	0	0	0	0	0	0	0	0	0	0	0	0	0	0	0	0
UNSA-00056	FS02489177	Good	1277	1	30.27	50	88	46	23	45	82	0.6	173	1	0	0	0	0	0	0	1	0	0	0	0	0	0	0	0	0	0	0	0	0	1	0	0	0	0	0	0	0	0	0	0	0	0	0	0
UNSA-00058	FS02489130	Good	2466	1	35.92	61	138	43	23	57.2	188.4	1	102	0	0	0	0	0	0	0	0	0	0	0	0	0	0	0	0	0	0	0	0	0	1	0	0	0	0	1	0	0	0	0	0	0	0	0	0
UNSA-00063	FS02489116	Good	4459	1	25.77	62	160	158	32	79	95	0.6	79	0	0	1	0	1	0	1	0	0	0	0	0	0	0	0	0	0	0	0	0	0	0	0	0	1	0	0	1	1	0	0	0	0	0	0	0
UNSA-00067	FS02489125	Good	5810	2	32.87	67	82	48	22	67.7	89.6	0.6	108	0	0	0	0	1	0	1	0	0	0	0	0	0	0	0	0	0	0	0	0	0	0	0	0	0	0	0	0	0	0	0	0	0	0	0	0
UNSA-00068	FS02489157	Good	6381	2	28.13	88	103	62	11	34.1	135.4	0.4	67	0	0	0	0	1	1	1	0	0	0	0	0	1	0	0	0	0	0	0	0	0	0	0	0	0	0	0	0	0	0	0	1	0	0	0	0
UNSA-00070	FS02489150	Good	7647	1	40.01	68	107	83	27	39	75	0.6	81	0	0	0	0	1	1	1	0	0	0	0	0	0	0	0	0	0	0	0	0	0	0	0	0	0	0	0	0	0	0	0	0	0	0	0	0
UNSA-00074	FS02489159	Good	8753	1	37.42	49	81	55	22	33	142	0.6	84	0	0	0	0	0	0	0	0	0	0	1	0	0	0	0	0	0	0	0	0	0	0	0	0	0	0	0	0	0	0	1	0	0	0	0	0
UNSA-00079	FS02488734	Good	11795	1	40.46	63	122	97	33	52	79	0.6	58	0	0	0	0	0	0	0	0	0	0	1	0	0	0	0	0	0	0	0	0	0	0	0	0	0	0	0	0	0	0	0	1	0	0	0	0
UNSA-00080	FS02488742	Good	12094	1	36.73	55	102	65	22	52.5	71.9	0.5	47	0	0	0	0	0	0	0	1	0	0	0	0	0	0	0	0	0	0	1	1	1	1	0	0	0	0	0	0	0	0	0	1	0	0	0	0
UNSA-00093	FS02489163	Good	4186	2	30.86	59	101	78	13	32.2	106.7	0.4	42	0	0	0	0	0	0	0	0	0	0	0	0	0	0	0	0	0	0	0	0	0	0	0	0	0	0	0	0	0	0	0	0	0	0	0	0
UNSA-00094	FS02489148	Good	5229	1	27.92	53	83	78	30	29	107	0.5	61	0	0	0	0	1	0	1	0	0	0	1	0	0	0	0	0	0	0	1	0	1	0	0	0	0	0	0	0	0	0	0	0	0	0	0	0
UNSA-00097	FS02489101	Good	5422	1	29.39	63	142	68	29	41.6	84.7	0.4	71	0	0	0	0	1	1	0	0	0	0	1	0	0	0	0	0	1	0	1	0	1	0	0	0	1	0	1	1	0	0	0	0	1	0	0	0
UNSA-00098	FS02489133	Good	5869	1	28.73	77	79	74	26	53.7	72.3	0.6	73	0	0	0	0	0	0	0	0	0	0	0	0	0	0	0	0	0	0	0	0	0	0	0	1	0	0	1	0	0	0	0	0	0	0	0	0
UNSA-00104	FS02489111	Good	8059	1	23.59	84	135	61	35	26.4	99	0.7	122	0	0	0	0	0	0	0	0	0	0	1	0	0	0	0	0	0	0	0	0	0	0	0	1	0	0	0	0	0	0	0	0	0	0	0	0
UNSA-00106	FS02489144	Good	10106	2	23.56	40	128	57	25	49	63	0.4	70	0	0	0	0	0	0	0	0	0	0	0	0	0	0	0	0	0	0	0	0	0	0	0	0	0	0	0	0	0	0	0	0	0	0	0	0
UNSA-00109	FS02489176	Good	10362	2	32.37	51	104	85	25	39	120	0.6	43	0	0	0	0	1	0	0	0	0	0	0	0	0	0	0	1	1	0	1	1	1	0	0	0	0	0	0	0	0	0	0	1	0	0	0	0
UNSA-00049	FS02489175	Good	8833	2	26.64	55	110	101	31	60	87	0.5	41	0	0	0	0	1	1	0	0	0	0	0	0	0	0	1	0	0	0	0	0	0	0	0	0	0	0	0	0	0	0	1	1	0	0	0	0
UNSA-00233	FS29243026	Good	1546	2	24.34	56	87	63	26	32	53	0.4	68	1	0	0	0	0	0	0	0	0	0	0	0	0	0	0	0	0	0	0	0	0	1	0	1	0	0	0	0	0	0	0	0	0	0	0	0
UNSA-00255	FS29243067	Good	4427	1	40.08	55	95	95	19	51	95	0.35	37	0	0	1	0	1	0	1	0	0	0	0	0	0	0	0	0	0	0	1	0	0	0	0	0	0	0	0	0	0	0	0	0	0	0	0	0
UNSA-00001	FS02489089	Poor	1039	2	29.43	58	100	67	10	26.9	72.5	0.6	78	0	0	0	0	1	1	0	0	0	0	1	1	0	0	0	0	0	0	1	1	0	0	0	0	0	0	0	0	0	0	0	0	1	0	0	0
UNSA-00006	FS02489154	Poor	2636	2	37.26	53	93	80	21	43.4	100.5	0.4	8	0	0	0	0	1	1	0	0	0	0	0	0	0	0	0	0	1	0	1	0	1	0	0	0	0	0	0	0	0	0	0	0	0	0	0	0
UNSA-00008	FS02489123	Poor	3873	2	30.25	37	120	62	31	34.7	55.4	1	72	0	0	1	0	1	0	0	0	0	0	0	0	0	0	0	0	0	0	0	0	0	0	0	0	0	0	0	0	1	0	0	0	0	0	0	0
UNSA-00011	FS02489100	Poor	4280	1	29.69	68	47	105	29	53	56	0.6	60	0	0	1	0	1	0	1	0	0	0	0	0	0	0	1	0	0	0	1	0	1	0	0	0	1	1	1	1	0	0	0	0	0	0	0	0
UNSA-00012	FS02489172	Poor	5354	2	20.31	53	131	108	24	57	172	0.6	79	0	0	0	0	1	0	1	0	0	0	0	0	0	0	0	0	0	0	1	1	0	0	0	0	0	0	0	0	0	0	0	0	0	0	0	0
UNSA-00017	FS02489102	Poor	6536	1	22.99	58	59	120	38	33	86	0.8	86	0	0	0	0	0	0	0	0	0	0	1	0	0	0	1	0	0	0	0	0	0	1	0	1	0	0	0	0	0	0	0	0	0	0	0	0
UNSA-00019	FS02489119	Poor	8202	1	23.15	71	137	102	37	43	109	1	62	0	0	0	0	1	0	1	1	0	0	1	0	0	0	0	0	0	0	0	0	0	0	0	1	0	0	1	0	0	0	0	0	0	0	0	0
UNSA-00025	FS02488773	Poor	11188	1	29.73	54	117	85	25	31	113	0.4	46	0	0	0	0	0	0	0	0	0	0	0	0	0	0	0	0	0	0	1	1	1	0	0	1	0	0	0	0	0	0	0	0	0	0	0	1
UNSA-00029	FS02489121	Poor	1121	2	20.44	73	133	76	23	32	164	0.4	55	0	1	1	0	0	0	0	0	0	0	0	0	0	0	0	0	0	0	0	0	0	0	0	0	0	0	0	0	1	0	0	0	0	0	0	0
UNSA-00033	FS02489106	Poor	1645	2	41.01	64	48	63	9	50	106	0.35	61	0	0	1	0	1	0	1	0	0	0	0	0	1	0	0	0	0	0	0	0	0	0	0	0	0	0	0	0	0	0	0	0	0	0	0	0
UNSA-00035	FS02489147	Poor	3958	1	40.82	60	110	74	24	83.5	74.1	0.4	64	0	0	0	0	1	0	0	0	0	0	0	0	0	0	0	0	0	0	0	0	0	1	0	0	0	0	0	0	0	0	0	0	0	0	0	0
UNSA-00042	FS02489173	Poor	6543	2	16.94	68	58	58	21	39	127	0.5	66	0	0	0	0	1	0	1	1	0	0	0	0	0	0	0	0	0	0	0	0	0	0	0	0	0	0	0	0	0	0	0	0	0	0	0	0
UNSA-00045	FS02489110	Poor	6946	2	30.45	81	121	53	26	29.7	123	0.4	84	0	0	0	0	0	0	0	1	0	0	1	0	0	0	0	0	0	0	0	0	0	0	0	1	1	0	0	0	0	0	0	0	0	0	0	0
UNSA-00047	FS02489127	Poor	8740	1	27.14	49	101	113	26	33	150	0.6	69	0	0	0	0	0	0	0	0	0	0	0	0	0	0	0	1	1	0	0	0	0	0	0	0	0	0	0	0	0	0	0	0	0	0	0	0
UNSA-00051	FS02489112	Poor	9402	1	27.04	63	107	60	28	33	91	0.7	65	0	0	0	0	0	0	0	1	0	0	0	0	0	0	0	0	0	0	0	0	0	0	0	0	1	0	0	0	0	0	0	0	0	0	0	0
UNSA-00053	FS02488766	Poor	11922	2	21.8	59	111	103	23	37	55	0.5	75	0	0	1	0	1	1	0	1	0	0	1	0	0	0	0	0	0	0	0	0	0	1	0	0	0	0	0	0	0	0	0	0	0	0	0	0
UNSA-00057	FS02489114	Poor	2072	2	25.78	82	115	134	41	36	87	0.4	61	0	0	0	0	1	0	1	0	0	0	1	0	1	0	0	0	0	0	1	0	1	0	0	0	0	0	1	0	0	0	0	0	0	0	0	0
UNSA-00061	FS02489170	Poor	3217	1	18.83	58	91	54	22	40.1	86.8	0.4	79	0	0	1	0	0	0	0	0	0	0	0	0	0	0	0	0	0	0	0	0	0	0	0	0	0	0	0	0	1	0	0	0	0	0	0	0
UNSA-00062	FS02489155	Poor	4127	2	28.72	63	62	56	15	52	167	0.6	74	0	0	1	0	1	0	1	0	0	0	0	0	0	0	0	0	0	0	0	0	0	0	0	0	0	0	1	0	0	0	0	0	0	0	0	0
UNSA-00066	FS02489140	Poor	5022	2	47.61	34	104	79	21	36	107	0.6	51	0	0	0	0	1	0	0	0	0	0	0	0	0	0	0	0	0	0	0	0	0	0	0	0	0	0	0	0	0	0	0	0	0	0	0	0
UNSA-00069	FS02489118	Poor	7000	2	24.61	49	113	92	21	44	86	0.6	37	0	0	0	0	1	0	1	0	0	0	0	0	0	0	0	0	0	0	1	1	1	0	0	0	0	0	0	0	0	0	0	0	1	0	0	0
UNSA-00071	FS02489158	Poor	7816	1	29.67	63	112	96	19	29	120	0.6	70	0	0	0	0	0	0	0	0	0	0	1	0	0	0	1	0	0	0	1	1	0	0	1	0	0	0	0	0	0	0	0	0	0	0	0	0
UNSA-00075	FS02489120	Poor	9707	1	21.05	79	133	60	22	45	72	0.4	72	0	0	0	0	1	0	1	0	0	0	1	0	0	0	0	0	0	0	0	0	0	0	0	1	0	0	1	0	0	0	0	0	0	0	0	0
UNSA-00078	FS02489168	Poor	10230	1	44.7	49	108	68	18	32	101	1	112	0	0	0	0	0	0	0	1	0	0	0	0	0	0	0	0	0	0	0	0	0	0	0	1	0	0	1	0	0	0	0	0	0	0	0	0
UNSA-00081	FS02488781	Poor	12143	1	24.56	54	105	115	20	32	87	0.4	38	0	0	0	0	1	0	1	0	0	0	1	0	0	0	1	0	0	0	0	0	0	0	0	0	0	0	1	0	0	0	1	1	0	0	0	0
UNSA-00084	FS02489097	Poor	1080	2	34.06	72	106	98	29	34	66	0.7	68	0	0	0	0	1	1	0	1	0	0	0	0	0	0	0	0	0	0	0	0	0	1	0	0	0	0	0	0	0	0	1	0	0	0	0	0
UNSA-00088	FS02489122	Poor	2301	2	29.76	80	54	53	22	41.8	91.6	0.4	92	0	0	0	0	1	0	0	0	0	0	0	0	0	0	0	0	0	0	0	0	0	1	0	1	1	0	1	0	0	1	0	0	0	0	0	0
UNSA-00089	FS02489178	Poor	3227	1	22.77	56	48	47	12	26.3	62.3	1	107	0	0	0	0	1	0	1	0	0	0	0	0	0	0	0	0	0	0	1	0	1	0	0	0	1	0	0	0	0	0	0	0	0	0	0	0
UNSA-00092	FS02489107	Poor	3789	2	37.5	79	102	56	35	37.6	76	0.6	84	0	0	0	0	1	0	1	1	0	0	0	0	0	0	0	0	0	0	0	0	0	0	0	0	0	0	0	0	0	0	0	0	0	0	0	0
UNSA-00099	FS02489165	Poor	6484	1	32.85	49	85	64	17	50	112	1	59	0	0	0	0	0	0	0	1	0	0	1	0	0	0	0	0	0	0	1	1	1	0	1	0	0	0	0	0	0	0	0	0	1	0	0	0
UNSA-00100	FS02489126	Poor	7181	1	34.64	55	120	56	32	38	100	0.8	83	0	0	0	1	0	0	0	0	0	0	1	0	0	0	0	0	0	0	1	1	0	0	0	0	1	1	0	0	0	0	1	1	0	0	0	0
UNSA-00101	FS02489182	Poor	7837	1	21.55	76	86	105	21	42	130	0.4	48	0	0	0	0	0	0	0	0	0	0	1	0	0	0	0	0	0	0	0	0	0	0	0	0	0	0	0	0	0	0	0	0	0	0	0	0
UNSA-00105	FS02489096	Poor	9270	1	48.06	55	112	46	30	26.6	95.7	0.4	92	0	0	0	0	0	0	0	1	0	0	0	0	0	0	0	0	0	0	0	0	0	1	0	0	0	0	0	1	0	0	0	0	0	0	0	0
UNSA-00110	FS02488776	Poor	11815	2	36.3	59	85	54	17	42.2	78.8	0.5	61	0	0	0	0	1	1	0	0	0	0	0	0	0	0	0	0	0	0	0	0	0	0	0	0	0	0	0	0	0	0	0	1	0	0	0	0
UNSA-00212	FS29243042	Poor	1579	2	32.18	74	107	66	12	128.5	43.7	0.8	78	0	0	0	0	1	0	1	0	0	0	0	0	0	0	0	0	0	0	0	0	0	0	0	0	0	0	0	0	0	0	0	0	0	0	0	0
[truncated: 19 more columns]

## Sheet: SPPB_SCORE
PAT_ID	Label	VISIT	SIDEBYSIDE	SIDEBYSIDESEC	SIDEBYSIDENO	SIDEBYSIDEOTHER	SEMITANDEM	SEMITANDEMSEC	SEMITANDEMNO	SEMITANDEMOTHER	TANDEM	TANDEMSEC	TANDEMNO	TANDEMOTHER	GAITTIME1	GAITNO1	GAITOTHER1	GAITAIDS1	GAITAIDSOTHER1	GAITTIME2	GAITNO2	GAITOTHER2	GAITAIDS2	GAITAIDSOTHER2	SAFESTAND	CHAIRRESULTS	CHAIRNO	CHAIROTHER	SAFESTAND5	STANDSEC	STANDNO	STANDOTHER	nogait	time	vcode	sidebyside_score	semitandem_score	tandem_score	gaittime	gait_score	stand_score	sppb_score	DSPPB
1039	Poor	icu	3	NA	6	NA	3	NA	6	NA	4	NA	6	NA	NA	6	NA	NA	NA	NA	6	NA	NA	NA	NA	3	6	NA	NA	NA	6	NA	1	1: ICU	1	0	0	0	NA	0	0	0	11
1039	Poor	hosp	3	NA	3	NA	3	NA	3	NA	4	NA	3	NA	NA	3	NA	NA	NA	NA	3	NA	NA	NA	NA	3	3	NA	NA	NA	3	NA	1	2: Hos	2	0	0	0	NA	0	0	0	13
1039	Poor	4m	1	NA	NA	NA	2	1.3	NA	NA	4	NA	3	NA	5.5	0	NA	2	NA	5.6	0	NA	2	NA	1	1	NA	NA	1	22	NA	NA	0	4: 4M	4	1	0	0	5.5	3	1	5	125
1039	Poor	6m	1	NA	NA	NA	2	3.01	NA	NA	4	NA	3	NA	6	0	NA	2	NA	6	0	NA	2	NA	1	1	NA	NA	1	15.2	NA	NA	0	5: 6M	5	1	0	0	6	3	2	6	181
1080	Poor	icu	3	NA	3	NA	3	NA	3	NA	4	NA	3	NA	NA	3	NA	NA	NA	NA	3	NA	NA	NA	0	NA	NA	NA	NA	NA	NA	NA	1	1: ICU	1	0	0	0	NA	0	0	0	33
1080	Poor	hosp	1	NA	NA	NA	2	5	NA	NA	2	6	NA	NA	12	0	NA	3	walker	10	0	NA	3	walker	0	NA	NA	NA	0	NA	NA	NA	0	2: Hos	2	1	0	0	10	1	0	2	50
1080	Poor	4m	1	NA	NA	NA	1	NA	NA	NA	2	6.1	NA	NA	4.6	0	NA	1	NA	4.2	0	NA	1	NA	1	1	NA	NA	1	12.3	NA	NA	0	4: 4M	4	1	1	1	4.2	4	3	10	146
1080	Poor	6m	1	NA	NA	NA	1	NA	NA	NA	2	8.35	NA	NA	7.78	0	NA	1	NA	7.63	0	NA	1	NA	1	NA	NA	NA	1	18.5	NA	NA	0	5: 6M	5	1	1	1	7.63	2	1	6	181
1121	Poor	icu	3	NA	3	NA	3	NA	4	NA	4	NA	4	NA	NA	3	NA	NA	NA	NA	3	NA	NA	NA	NA	NA	4	NA	NA	NA	4	NA	1	1: ICU	1	0	0	0	NA	0	0	0	8
1121	Poor	2m	NA	NA	1	NA	3	NA	3	NA	4	NA	3	NA	9.7	0	NA	NA	NA	11.3	0	NA	NA	NA	1	2	NA	NA	0	NA	NA	NA	0	3: 2M	3	NA	NA	NA	9.7	1	0	1	63
1121	Poor	4m	1	NA	NA	NA	2	1.5	NA	NA	4	NA	3	NA	15.1	0	NA	2	NA	17.5	0	NA	2	NA	1	2	NA	NA	0	NA	NA	NA	0	4: 4M	4	1	0	0	15.1	1	0	2	124
1121	Poor	6m	1	NA	NA	NA	1	NA	NA	NA	4	NA	1	NA	9.9	0	NA	2	NA	9.6	0	NA	2	NA	1	2	NA	NA	NA	NA	NA	NA	0	5: 6M	5	1	1	0	9.6	1	0	3	176
1159	Good	icu	1	NA	NA	NA	1	NA	NA	NA	1	NA	NA	NA	7.5	0	NA	NA	NA	7.9	0	NA	NA	NA	1	3	1	NA	NA	NA	NA	NA	0	1: ICU	1	1	1	2	7.5	2	0	6	7
1159	Good	2m	1	NA	NA	NA	1	NA	NA	NA	1	NA	NA	NA	6.4	0	NA	2	NA	6.6	0	NA	2	NA	1	1	NA	NA	0	NA	4	NA	0	3: 2M	3	1	1	2	6.4	2	0	6	85
1159	Good	4m	1	NA	NA	NA	1	NA	NA	NA	1	NA	NA	NA	6.5	0	NA	2	NA	6.8	0	NA	2	NA	1	1	NA	NA	1	NA	6	NA	0	4: 4M	4	1	1	2	6.5	2	0	6	115
1159	Good	6m	1	NA	NA	NA	1	NA	NA	NA	1	NA	NA	NA	6.2	0	NA	1	NA	6.8	0	NA	1	NA	1	1	NA	NA	1	12.4	NA	NA	0	5: 6M	5	1	1	2	6.2	3	3	10	176
1202	Good	icu	1	NA	NA	NA	2	2	NA	NA	1	NA	NA	NA	NA	7	Pt on BiPap	NA	NA	NA	7	Pt on BiPap	NA	NA	1	1	NA	NA	1	23	NA	NA	1	1: ICU	1	1	0	0	NA	0	1	2	9
1202	Good	2m	1	NA	NA	NA	1	NA	NA	NA	1	NA	NA	NA	3.9	0	NA	NA	NA	4.1	0	NA	NA	NA	1	1	NA	NA	1	11.7	NA	NA	0	3: 2M	3	1	1	2	3.9	4	3	11	78
1202	Good	4m	1	NA	NA	NA	1	NA	NA	NA	1	NA	NA	NA	4.8	0	NA	1	NA	3.2	0	NA	1	NA	1	1	NA	NA	1	11.5	NA	NA	0	4: 4M	4	1	1	2	3.2	4	3	11	170
1202	Good	6m	1	NA	NA	NA	1	NA	NA	NA	1	NA	NA	NA	3.75	0	NA	1	NA	3.66	0	NA	1	NA	1	1	NA	NA	1	10	NA	NA	0	5: 6M	5	1	1	2	3.66	4	4	12	207
1277	Good	icu	2	0	3	NA	3	NA	3	NA	4	NA	3	NA	NA	3	NA	NA	NA	NA	3	NA	NA	NA	0	NA	NA	NA	0	NA	NA	NA	1	1: ICU	1	0	0	0	NA	0	0	0	13
1277	Good	hosp	1	NA	NA	NA	1	NA	NA	NA	1	NA	NA	NA	6	0	NA	3	Rolling Walker	5	0	NA	3	Rolling Walker	1	2	NA	NA	0	NA	1	NA	0	2: Hos	2	1	1	2	5	3	0	7	16
1277	Good	6m	1	NA	NA	NA	1	NA	NA	NA	1	NA	NA	NA	2.71	0	NA	1	NA	2.03	0	NA	1	NA	1	1	NA	NA	1	7.03	NA	NA	0	5: 6M	5	1	1	2	2.03	4	4	12	190
1546	Good	icu	3	NA	2	NA	3	NA	2	NA	4	NA	2	NA	NA	1	NA	NA	NA	NA	3	NA	NA	NA	1	2	NA	NA	0	NA	NA	NA	1	1: ICU	1	0	0	0	NA	0	0	0	9
1546	Good	hosp	1	NA	NA	NA	2	3.9	NA	NA	4	NA	3	NA	16.7	0	NA	NA	NA	15.3	0	NA	NA	NA	1	2	NA	NA	0	NA	NA	NA	0	2: Hos	2	1	0	0	15.3	1	0	2	12
1546	Good	2m	1	NA	NA	NA	1	NA	NA	NA	1	NA	NA	NA	3.1	0	NA	1	NA	2.6	0	NA	1	NA	1	1	NA	NA	1	11.2	NA	NA	0	3: 2M	3	1	1	2	2.6	4	3	11	80
1546	Good	4m	1	NA	NA	NA	1	NA	NA	NA	1	NA	NA	NA	2.75	0	NA	1	NA	2.94	0	NA	1	NA	1	1	NA	NA	1	9.06	NA	NA	0	4: 4M	4	1	1	2	2.75	4	4	12	138
1546	Good	6m	1	NA	NA	NA	1	NA	NA	NA	1	NA	NA	NA	2.81	0	NA	1	NA	2.63	0	NA	1	NA	1	1	NA	NA	1	9.37	NA	NA	0	5: 6M	5	1	1	2	2.63	4	4	12	185
1579	Poor	icu	NA	NA	3	NA	NA	NA	3	NA	NA	NA	3	NA	NA	3	NA	NA	NA	NA	3	NA	NA	NA	0	NA	NA	NA	0	NA	NA	NA	1	1: ICU	1	NA	NA	NA	NA	0	0	0	5
1579	Poor	6m	1	NA	NA	NA	1	NA	NA	NA	2	7.31	NA	NA	14.07	0	NA	3	walker	19.69	0	NA	3	walker	1	2	NA	NA	NA	NA	NA	NA	0	5: 6M	5	1	1	1	14.07	1	0	4	207
1645	Poor	hosp	3	NA	NA	NA	3	NA	NA	NA	4	NA	NA	NA	NA	4	NA	NA	NA	NA	4	NA	NA	NA	0	NA	3	NA	0	NA	NA	NA	1	2: Hos	2	0	0	0	NA	0	0	0	8
1645	Poor	2m	3	NA	2	NA	3	NA	2	NA	4	NA	2	NA	NA	2	NA	NA	NA	NA	2	NA	NA	NA	0	3	2	NA	NA	NA	2	NA	1	3: 2M	3	0	0	0	NA	0	0	0	92
1645	Poor	4m	1	NA	NA	NA	1	NA	NA	NA	2	3.62	NA	NA	10.5	0	NA	3	walker	11.56	0	NA	3	walker	1	1	NA	NA	0	NA	NA	NA	0	4: 4M	4	1	1	1	10.5	1	0	4	128
1645	Poor	6m	1	NA	NA	NA	2	1.25	NA	NA	4	NA	3	NA	18.19	0	NA	3	Walker	18.38	0	NA	3	Walker	1	1	NA	NA	1	86.94	NA	NA	0	5: 6M	5	1	0	0	18.19	1	0	2	184
2072	Poor	hosp	1	NA	NA	NA	2	2	NA	NA	4	NA	3	NA	5.1	0	NA	1	NA	4.8	0	NA	1	NA	1	1	NA	NA	1	43.3	NA	NA	0	2: Hos	2	1	0	0	4.8	4	1	6	8
2072	Poor	2m	1	NA	NA	NA	1	NA	NA	NA	1	NA	NA	NA	4.06	0	NA	1	NA	3.96	0	NA	1	NA	1	1	NA	NA	1	16.72	NA	NA	0	3: 2M	3	1	1	2	3.96	4	1	9	86
2072	Poor	4m	3	NA	3	NA	3	NA	3	NA	4	NA	3	NA	NA	3	NA	NA	NA	NA	3	NA	NA	NA	0	NA	NA	NA	NA	NA	NA	NA	1	4: 4M	4	0	0	0	NA	0	0	0	116
2072	Poor	6m	2	9.88	NA	NA	3	NA	3	NA	4	NA	3	NA	NA	3	NA	NA	NA	NA	3	NA	NA	NA	1	2	NA	NA	NA	NA	NA	NA	1	5: 6M	5	0	0	0	NA	0	0	0	177
2301	Poor	icu	3	NA	3	NA	3	NA	3	NA	4	NA	3	NA	NA	3	NA	NA	NA	NA	3	NA	NA	NA	0	NA	NA	NA	NA	NA	NA	NA	1	1: ICU	1	0	0	0	NA	0	0	0	4
2301	Poor	hosp	1	NA	NA	NA	1	NA	NA	NA	3	NA	NA	NA	12.56	0	NA	1	NA	13.66	0	NA	1	NA	1	1	NA	NA	0	NA	4	NA	0	2: Hos	2	1	1	0	12.56	1	0	3	5
2301	Poor	2m	3	NA	3	NA	3	NA	3	NA	4	NA	3	NA	NA	3	NA	NA	NA	NA	3	NA	NA	NA	0	NA	NA	NA	NA	NA	NA	NA	1	3: 2M	3	0	0	0	NA	0	0	0	74
2301	Poor	4m	3	NA	1	NA	3	NA	3	NA	4	NA	3	NA	8.78	0	NA	3	walker	9.35	0	NA	3	walker	0	NA	NA	NA	NA	NA	NA	NA	0	4: 4M	4	0	0	0	8.78	1	0	1	142
2301	Poor	6m	1	NA	NA	NA	3	NA	1	NA	4	NA	3	NA	7.53	0	NA	1	NA	7.41	0	NA	1	NA	1	1	NA	NA	1	12.87	NA	NA	0	5: 6M	5	1	0	0	7.41	2	3	6	185
2466	Good	icu	1	NA	NA	NA	2	3.63	NA	NA	4	NA	3	NA	5.5	0	NA	1	NA	6.37	0	NA	1	NA	1	1	NA	NA	1	21.69	NA	NA	0	1: ICU	1	1	0	0	5.5	3	1	5	7
2466	Good	hosp	1	NA	NA	NA	1	NA	NA	NA	2	5.49	NA	NA	6.81	0	NA	1	NA	7.51	0	NA	1	NA	1	1	NA	NA	1	32.19	NA	NA	0	2: Hos	2	1	1	1	6.81	2	1	6	11
2466	Good	4m	1	NA	NA	NA	1	NA	NA	NA	3	2.22	NA	NA	4.69	0	NA	1	NA	3.59	0	NA	1	NA	1	1	NA	NA	0	NA	1	NA	0	4: 4M	4	1	1	0	3.59	4	0	6	105
2466	Good	6m	1	NA	NA	NA	1	NA	NA	NA	1	NA	NA	NA	6.25	0	NA	3	O2	3.23	0	NA	3	O2	0	3	1	NA	0	NA	3	NA	0	5: 6M	5	1	1	2	3.23	4	0	8	197
2636	Poor	icu	NA	NA	1	NA	3	NA	3	NA	4	NA	3	NA	NA	3	NA	NA	NA	NA	3	NA	NA	NA	1	2	NA	NA	NA	NA	NA	NA	1	1: ICU	1	NA	NA	NA	NA	0	0	0	3
2636	Poor	hosp	1	NA	NA	NA	1	NA	NA	NA	2	4.02	NA	NA	33.19	0	NA	3	handrail	27.13	0	NA	3	handrail	1	2	NA	NA	NA	NA	NA	NA	0	2: Hos	2	1	1	1	27.13	1	0	4	15
2636	Poor	2m	1	NA	NA	NA	1	NA	NA	NA	2	7.25	NA	NA	4.56	0	NA	1	NA	4.62	0	NA	1	NA	1	1	NA	NA	1	24.47	NA	NA	0	3: 2M	3	1	1	1	4.56	4	1	8	67
2636	Poor	4m	1	NA	NA	NA	1	NA	NA	NA	1	NA	NA	NA	5.97	0	NA	1	NA	5.58	0	NA	1	NA	1	1	NA	NA	1	20.95	NA	NA	0	4: 4M	4	1	1	2	5.58	3	1	8	128
2636	Poor	6m	1	NA	NA	NA	1	NA	NA	NA	3	NA	NA	NA	6	0	NA	1	NA	4.94	0	NA	1	NA	1	1	NA	NA	1	28.18	NA	NA	0	5: 6M	5	1	1	0	4.94	3	1	6	183
2869	Good	hosp	3	NA	1	NA	3	NA	3	NA	4	NA	3	NA	NA	3	NA	NA	NA	NA	3	NA	NA	NA	0	NA	NA	NA	NA	NA	NA	NA	1	2: Hos	2	0	0	0	NA	0	0	0	5
2869	Good	2m	1	NA	NA	NA	1	NA	NA	NA	1	NA	NA	NA	4.96	0	NA	1	NA	4.44	0	NA	1	NA	1	1	NA	NA	0	NA	NA	NA	0	3: 2M	3	1	1	2	4.44	4	0	8	65
2869	Good	4m	1	NA	NA	NA	1	NA	NA	NA	1	NA	NA	NA	5.47	0	NA	1	NA	5.53	0	NA	1	NA	1	1	NA	NA	1	82.97	NA	NA	0	4: 4M	4	1	1	2	5.47	3	0	7	121
2869	Good	6m	1	NA	NA	NA	1	NA	NA	NA	1	NA	NA	NA	5.5	0	NA	1	NA	5.63	0	NA	1	NA	1	1	NA	NA	1	45.47	NA	NA	0	5: 6M	5	1	1	2	5.5	3	1	8	190
3217	Poor	icu	3	NA	3	NA	3	NA	3	NA	4	NA	3	NA	NA	3	NA	NA	NA	NA	3	NA	NA	NA	0	NA	NA	NA	NA	NA	NA	NA	1	1: ICU	1	0	0	0	NA	0	0	0	4
3217	Poor	hosp	3	NA	3	NA	3	NA	3	NA	4	NA	3	NA	NA	3	NA	NA	NA	NA	3	NA	NA	NA	0	NA	NA	NA	NA	NA	NA	NA	1	2: Hos	2	0	0	0	NA	0	0	0	9
3217	Poor	2m	3	NA	3	NA	3	NA	3	NA	4	NA	3	NA	NA	3	NA	NA	NA	NA	3	NA	NA	NA	0	3	4	NA	0	NA	NA	NA	1	3: 2M	3	0	0	0	NA	0	0	0	90
3217	Poor	4m	1	NA	NA	NA	1	NA	NA	NA	4	NA	1	NA	54.93	0	NA	3	Walker	38.43	0	NA	3	Walker	0	3	3	NA	NA	NA	NA	NA	0	4: 4M	4	1	1	0	38.43	1	0	3	122
3217	Poor	6m	1	NA	NA	NA	2	7.09	NA	NA	4	NA	3	NA	41.46	0	NA	3	Walker	41.87	0	NA	3	Walker	0	NA	3	NA	0	NA	3	NA	0	5: 6M	5	1	0	0	41.46	1	0	2	185
3227	Poor	hosp	3	NA	3	NA	3	NA	3	NA	4	NA	3	NA	NA	3	NA	NA	NA	NA	3	NA	NA	NA	0	3	3	NA	0	NA	3	NA	1	2: Hos	2	0	0	0	NA	0	0	0	10
3227	Poor	2m	1	NA	NA	NA	2	5.32	NA	NA	3	NA	NA	NA	9.88	0	NA	2	NA	9.4	0	NA	2	NA	1	1	NA	NA	1	40.54	NA	NA	0	3: 2M	3	1	0	0	9.4	1	1	3	91
3227	Poor	4m	1	NA	NA	NA	1	NA	NA	NA	2	7.93	NA	NA	6.62	0	NA	2	NA	7.63	0	NA	2	NA	0	3	3	NA	0	NA	3	NA	0	4: 4M	4	1	1	1	6.62	2	0	5	126
3227	Poor	6m	1	NA	NA	NA	1	NA	NA	NA	4	NA	1	NA	6.31	0	NA	NA	NA	5.87	0	NA	NA	NA	1	1	NA	NA	1	NA	1	NA	0	5: 6M	5	1	1	0	5.87	3	0	5	181
3789	Poor	icu	3	NA	3	NA	3	NA	3	NA	NA	NA	NA	NA	NA	3	NA	NA	NA	NA	3	NA	NA	NA	0	3	3	NA	0	NA	3	NA	1	1: ICU	1	0	0	0	NA	0	0	0	10
3789	Poor	2m	1	NA	NA	NA	2	4.24	NA	NA	4	NA	3	NA	7.34	0	NA	2	NA	NA	3	NA	NA	NA	1	2	NA	NA	0	NA	NA	NA	0	3: 2M	3	1	0	0	7.34	2	0	3	64
3789	Poor	4m	1	NA	NA	NA	1	NA	NA	NA	2	4.46	NA	NA	9.28	0	NA	2	NA	7.64	0	NA	2	NA	1	1	NA	NA	1	28.84	NA	NA	0	4: 4M	4	1	1	1	7.64	2	1	6	117
3789	Poor	6m	1	NA	NA	NA	1	NA	NA	NA	2	7.16	NA	NA	8.53	0	NA	2	NA	9.75	0	NA	2	NA	1	1	NA	NA	1	22.31	NA	NA	0	5: 6M	5	1	1	1	8.53	2	1	6	193
3809	Good	icu	3	NA	3	NA	3	NA	3	NA	4	NA	3	NA	NA	3	NA	NA	NA	NA	3	NA	NA	NA	0	3	3	NA	0	NA	3	NA	1	1: ICU	1	0	0	0	NA	0	0	0	10
3809	Good	hosp	1	NA	NA	NA	2	9.72	1	NA	4	NA	3	NA	NA	3	NA	1	NA	NA	3	NA	1	NA	0	3	3	NA	0	NA	3	NA	1	2: Hos	2	1	0	0	NA	0	0	1	14
3809	Good	2m	1	NA	NA	NA	1	NA	NA	NA	2	3.14	NA	NA	3.81	0	NA	1	NA	3.76	0	NA	1	NA	1	1	NA	NA	1	10.85	NA	NA	0	3: 2M	3	1	1	1	3.76	4	4	11	78
3809	Good	4m	1	NA	NA	NA	1	NA	NA	NA	2	3	NA	NA	5.19	0	NA	1	NA	5.1	0	NA	1	NA	1	1	NA	NA	1	9.75	NA	NA	0	4: 4M	4	1	1	1	5.1	3	4	10	121
3809	Good	6m	1	NA	NA	NA	1	NA	NA	NA	1	NA	NA	NA	4.94	0	NA	1	NA	5.22	0	NA	1	NA	1	1	NA	NA	1	11.63	NA	NA	0	5: 6M	5	1	1	2	4.94	3	3	10	202
3873	Poor	icu	3	NA	3	NA	3	NA	3	NA	4	NA	3	NA	NA	3	NA	NA	NA	NA	3	NA	NA	NA	0	3	3	NA	0	NA	3	NA	1	1: ICU	1	0	0	0	NA	0	0	0	12
3873	Poor	2m	1	NA	NA	NA	1	NA	NA	NA	1	NA	NA	NA	6.56	0	NA	1	NA	6.54	0	NA	1	NA	1	1	NA	NA	1	14.8	NA	NA	0	3: 2M	3	1	1	2	6.54	2	2	8	63
3873	Poor	4m	1	NA	NA	NA	1	NA	NA	NA	1	NA	NA	NA	7.35	0	NA	1	NA	7.78	0	NA	1	NA	1	1	NA	NA	1	60	NA	NA	0	4: 4M	4	1	1	2	7.35	2	1	7	146
3873	Poor	6m	1	NA	NA	NA	1	NA	NA	NA	2	4.72	NA	NA	9.72	0	NA	2	NA	8.97	0	NA	2	NA	1	1	NA	NA	1	52.5	NA	NA	0	5: 6M	5	1	1	1	8.97	1	1	5	189
3958	Poor	icu	1	NA	NA	NA	1	NA	NA	NA	4	NA	1	NA	5.42	0	NA	3	o2	6.57	0	NA	3	o2	1	1	NA	NA	1	14.26	NA	NA	0	1: ICU	1	1	1	0	5.42	3	2	7	7
3958	Poor	2m	1	NA	NA	NA	1	NA	NA	NA	1	NA	NA	NA	5.44	0	NA	1	NA	4.96	0	NA	1	NA	1	1	NA	NA	1	11.72	NA	NA	0	3: 2M	3	1	1	2	4.96	3	3	10	68
3958	Poor	4m	1	NA	NA	NA	1	NA	NA	NA	1	NA	NA	NA	6.38	0	NA	1	NA	5.35	0	NA	1	NA	1	NA	NA	NA	1	12.88	NA	NA	0	4: 4M	4	1	1	2	5.35	3	3	10	124
3958	Poor	6m	1	NA	NA	NA	3	NA	1	NA	4	NA	3	NA	NA	3	NA	NA	NA	NA	3	NA	NA	NA	1	2	NA	NA	0	NA	3	NA	1	5: 6M	5	1	0	0	NA	0	0	1	202
4127	Poor	hosp	3	NA	3	NA	3	NA	3	NA	4	NA	3	NA	NA	3	NA	NA	NA	NA	3	NA	NA	NA	0	NA	3	NA	0	NA	3	NA	1	2: Hos	2	0	0	0	NA	0	0	0	2
4127	Poor	2m	1	NA	NA	NA	1	NA	NA	NA	4	NA	1	NA	8.06	0	NA	1	NA	8.16	0	NA	1	NA	1	1	NA	NA	1	18.37	NA	NA	0	3: 2M	3	1	1	0	8.06	2	1	5	55
4127	Poor	4m	1	NA	NA	NA	3	NA	4	NA	4	NA	4	NA	17.9	0	NA	1	NA	17.22	0	NA	1	NA	1	1	NA	NA	1	27.66	NA	NA	0	4: 4M	4	1	0	0	17.22	1	1	3	126
4127	Poor	6m	1	NA	NA	NA	3	NA	4	NA	4	NA	4	NA	18.62	0	NA	1	NA	18.57	0	NA	1	NA	1	1	NA	NA	1	16.54	NA	NA	0	5: 6M	5	1	0	0	18.57	1	2	4	191
4186	Good	icu	1	NA	NA	NA	1	NA	NA	NA	2	4.03	NA	NA	6.13	0	NA	1	NA	6.14	0	NA	1	NA	1	1	NA	NA	1	14.66	NA	NA	0	1: ICU	1	1	1	1	6.13	3	2	8	14
4186	Good	hosp	1	NA	NA	NA	1	NA	NA	NA	1	NA	NA	NA	11.37	0	NA	1	NA	9.03	0	NA	1	NA	1	1	NA	NA	1	17.06	NA	NA	0	2: Hos	2	1	1	2	9.03	1	1	6	18
4186	Good	2m	1	NA	NA	NA	1	NA	NA	NA	1	NA	NA	NA	6.19	0	NA	1	NA	4.93	0	NA	1	NA	1	2	NA	NA	1	15.81	NA	NA	0	3: 2M	3	1	1	2	4.93	3	2	9	67
4186	Good	4m	1	NA	NA	NA	1	NA	NA	NA	1	NA	NA	NA	3.97	0	NA	1	NA	3.68	0	NA	1	NA	1	1	NA	NA	1	13.65	NA	NA	0	4: 4M	4	1	1	2	3.68	4	3	11	125
4186	Good	6m	1	NA	NA	NA	2	6.47	NA	NA	1	NA	NA	NA	5.43	0	NA	1	NA	4.63	0	NA	1	NA	1	NA	NA	NA	1	13.43	NA	NA	0	5: 6M	5	1	0	0	4.63	4	3	8	187
4199	Good	icu	1	NA	NA	NA	1	NA	NA	NA	1	NA	NA	NA	NA	3	NA	NA	NA	NA	3	NA	NA	NA	1	2	NA	NA	0	NA	NA	NA	1	1: ICU	1	1	1	2	NA	0	0	4	5
4199	Good	hosp	1	NA	NA	NA	1	NA	NA	NA	2	4.5	NA	NA	13.37	0	NA	1	NA	14.53	0	NA	1	NA	1	1	NA	NA	1	27.65	NA	NA	0	2: Hos	2	1	1	1	13.37	1	1	5	9
4199	Good	2m	1	NA	NA	NA	1	NA	NA	NA	1	NA	NA	NA	7.44	0	NA	1	NA	7.16	0	NA	NA	NA	1	1	NA	NA	1	30.4	NA	NA	0	3: 2M	3	1	1	2	7.16	2	1	7	52
4199	Good	4m	1	NA	NA	NA	1	NA	NA	NA	1	NA	NA	NA	4.88	0	NA	1	NA	4.66	0	NA	1	NA	1	1	NA	NA	1	16.31	NA	NA	0	4: 4M	4	1	1	2	4.66	4	2	10	122
4199	Good	6m	1	NA	NA	NA	1	NA	NA	NA	1	NA	NA	NA	6.09	0	NA	1	NA	5.62	0	NA	1	NA	1	1	NA	NA	1	18.31	NA	NA	0	5: 6M	5	1	1	2	5.62	3	1	8	185
4280	Poor	hosp	3	NA	6	NA	3	NA	6	NA	4	NA	6	NA	NA	6	NA	NA	NA	NA	6	NA	NA	NA	0	NA	6	NA	0	NA	NA	NA	1	2: Hos	2	0	0	0	NA	0	0	0	10
4280	Poor	2m	3	NA	3	NA	3	NA	3	NA	4	NA	3	NA	NA	3	NA	NA	NA	NA	3	NA	NA	NA	1	2	NA	NA	0	NA	NA	NA	1	3: 2M	3	0	0	0	NA	0	0	0	66
4280	Poor	4m	3	NA	3	NA	3	NA	3	NA	4	NA	3	NA	NA	3	NA	NA	NA	NA	3	NA	NA	NA	1	2	NA	NA	0	NA	NA	NA	1	4: 4M	4	0	0	0	NA	0	0	0	125
4280	Poor	6m	3	NA	3	NA	3	NA	3	NA	4	NA	3	NA	NA	3	NA	NA	NA	NA	3	NA	NA	NA	0	3	3	NA	0	NA	3	NA	1	5: 6M	5	0	0	0	NA	0	0	0	187
4427	Good	hosp	1	NA	NA	NA	2	4.5	NA	NA	4	NA	3	NA	14.1	0	NA	1	NA	11.35	0	NA	1	NA	1	1	NA	NA	1	9.12	NA	NA	0	2: Hos	2	1	0	0	11.35	1	4	6	2
4427	Good	2m	2	3.22	NA	NA	3	NA	3	NA	4	NA	3	NA	4.47	0	NA	1	NA	4.25	0	NA	1	NA	1	1	NA	NA	1	12.13	NA	NA	0	3: 2M	3	0	0	0	4.25	4	3	7	58
4427	Good	4m	1	NA	NA	NA	2	3.3	NA	NA	4	NA	3	NA	4.71	0	NA	1	NA	4.44	0	NA	1	NA	1	1	NA	NA	1	15.41	NA	NA	0	4: 4M	4	1	0	0	4.44	4	2	7	122
4427	Good	6m	1	NA	NA	NA	1	NA	NA	NA	3	2.52	NA	NA	4.8	0	NA	1	NA	4.25	0	NA	1	NA	1	NA	NA	NA	1	11.94	NA	NA	0	5: 6M	5	1	1	0	4.25	4	3	9	182
4459	Good	icu	3	NA	3	NA	3	NA	3	NA	4	NA	3	NA	NA	3	NA	NA	NA	NA	3	NA	NA	NA	0	3	3	NA	0	NA	3	NA	1	1: ICU	1	0	0	0	NA	0	0	0	4
4459	Good	hosp	3	NA	3	NA	3	NA	3	NA	4	NA	3	NA	NA	3	NA	NA	NA	NA	3	NA	NA	NA	0	3	3	NA	0	NA	3	NA	1	2: Hos	2	0	0	0	NA	0	0	0	10
4459	Good	2m	1	NA	NA	NA	1	NA	NA	NA	1	NA	NA	NA	NA	3	NA	NA	NA	NA	3	NA	NA	NA	1	1	NA	NA	1	9.16	NA	NA	1	3: 2M	3	1	1	2	NA	0	4	8	63
4459	Good	4m	1	NA	NA	NA	1	NA	NA	NA	1	NA	NA	NA	4.47	0	NA	1	NA	4.43	0	NA	1	NA	1	1	NA	NA	1	12.94	NA	NA	0	4: 4M	4	1	1	2	4.43	4	3	11	122
4459	Good	6m	1	NA	NA	NA	1	NA	NA	NA	1	NA	NA	NA	4.1	0	NA	1	NA	7.79	0	NA	1	NA	1	1	NA	NA	1	19.97	NA	NA	0	5: 6M	5	1	1	2	4.1	4	1	9	181
5022	Poor	icu	3	NA	3	NA	3	NA	3	NA	4	NA	3	NA	NA	3	NA	NA	NA	NA	3	NA	NA	NA	0	3	3	NA	0	NA	3	NA	1	1: ICU	1	0	0	0	NA	0	0	0	11
5022	Poor	hosp	3	NA	3	NA	3	NA	4	NA	4	NA	3	NA	NA	3	NA	NA	NA	NA	3	NA	NA	NA	0	3	3	NA	0	NA	3	NA	1	2: Hos	2	0	0	0	NA	0	0	0	17
5022	Poor	2m	1	NA	NA	NA	1	NA	NA	NA	1	NA	NA	NA	7.97	0	NA	2	NA	8.31	0	NA	2	NA	1	2	NA	NA	1	38.84	NA	NA	0	3: 2M	3	1	1	2	7.97	2	1	7	65
5022	Poor	4m	1	NA	NA	NA	1	NA	NA	NA	1	NA	NA	NA	8.03	0	NA	2	NA	7.37	0	NA	2	NA	1	1	NA	NA	1	32.09	NA	NA	0	4: 4M	4	1	1	2	7.37	2	1	7	124
5022	Poor	6m	3	NA	6	NA	3	NA	3	NA	4	NA	3	NA	NA	3	NA	NA	NA	NA	3	NA	NA	NA	0	3	3	NA	0	NA	3	NA	1	5: 6M	5	0	0	0	NA	0	0	0	173
5229	Good	icu	1	NA	NA	NA	2	2.75	NA	NA	4	NA	3	NA	5.69	0	NA	1	NA	5.27	0	NA	1	NA	1	1	NA	NA	1	23.63	NA	NA	0	1: ICU	1	1	0	0	5.27	3	1	5	5
5229	Good	hosp	1	NA	NA	NA	2	6.03	NA	NA	4	NA	3	NA	6.81	0	NA	1	NA	7.84	0	NA	3	rail	1	1	NA	NA	1	15.81	NA	NA	0	2: Hos	2	1	0	0	6.81	2	2	5	7
5229	Good	2m	1	NA	NA	NA	1	NA	NA	NA	1	NA	NA	NA	3.38	0	NA	1	NA	3.66	0	NA	1	NA	1	1	NA	NA	0	NA	4	NA	0	3: 2M	3	1	1	2	3.38	4	0	8	60
5229	Good	4m	1	NA	NA	NA	1	NA	NA	NA	2	7.08	NA	NA	5.72	0	NA	1	NA	3.97	0	NA	1	NA	1	1	NA	NA	1	11.25	NA	NA	0	4: 4M	4	1	1	1	3.97	4	3	10	122
5229	Good	6m	1	NA	NA	NA	1	NA	NA	NA	1	NA	NA	NA	3.16	0	NA	1	NA	3.09	0	NA	1	NA	1	1	NA	NA	1	12.97	NA	NA	0	5: 6M	5	1	1	2	3.09	4	3	11	204
5354	Poor	icu	3	NA	3	NA	3	NA	3	NA	4	NA	3	NA	NA	3	NA	NA	NA	NA	3	NA	NA	NA	0	3	3	NA	0	NA	3	NA	1	1: ICU	1	0	0	0	NA	0	0	0	16
5354	Poor	hosp	1	NA	NA	NA	1	NA	NA	NA	3	0.93	NA	NA	11.76	0	NA	1	NA	7.96	0	NA	1	NA	1	2	NA	NA	0	NA	3	NA	0	2: Hos	2	1	1	0	7.96	2	0	4	18
5354	Poor	2m	1	NA	NA	NA	1	NA	NA	NA	1	NA	NA	NA	3.37	0	NA	1	NA	3.03	0	NA	1	NA	1	1	NA	NA	1	10.06	NA	NA	0	3: 2M	3	1	1	2	3.03	4	4	12	60
5354	Poor	4m	3	NA	6	NA	3	NA	6	NA	4	NA	6	NA	NA	6	NA	NA	NA	NA	6	NA	NA	NA	0	3	6	NA	0	NA	6	NA	1	4: 4M	4	0	0	0	NA	0	0	0	128
5354	Poor	6m	3	NA	3	NA	3	NA	3	NA	4	NA	3	NA	NA	3	NA	NA	NA	NA	3	NA	NA	NA	0	3	3	NA	0	NA	3	NA	1	5: 6M	5	0	0	0	NA	0	0	0	185
5422	Good	icu	3	NA	3	NA	3	NA	3	NA	4	NA	3	NA	NA	3	NA	NA	NA	NA	3	NA	NA	NA	0	3	3	NA	0	NA	3	NA	1	1: ICU	1	0	0	0	NA	0	0	0	6
5422	Good	hosp	1	NA	NA	NA	1	NA	NA	NA	4	NA	1	NA	NA	1	NA	NA	NA	NA	3	NA	NA	NA	1	1	NA	NA	1	79.03	NA	NA	1	2: Hos	2	1	1	0	NA	0	0	2	9
5422	Good	2m	1	NA	NA	NA	1	NA	NA	NA	1	NA	NA	NA	3.44	0	NA	1	NA	3.31	0	NA	1	NA	1	1	NA	NA	1	8.1	NA	NA	0	3: 2M	3	1	1	2	3.31	4	4	12	65
5422	Good	4m	1	NA	NA	NA	1	NA	NA	NA	1	NA	NA	NA	2.12	0	NA	1	NA	2.47	0	NA	1	NA	1	1	NA	NA	1	10.47	NA	NA	0	4: 4M	4	1	1	2	2.12	4	4	12	120
5422	Good	6m	1	NA	NA	NA	1	NA	NA	NA	1	NA	NA	NA	3.56	0	NA	1	NA	3.72	0	NA	1	NA	1	1	NA	NA	1	15.97	NA	NA	0	5: 6M	5	1	1	2	3.56	4	2	10	184
5478	Good	icu	3	NA	3	NA	3	NA	3	NA	4	NA	3	NA	NA	3	NA	NA	NA	NA	3	NA	NA	NA	1	2	NA	NA	0	NA	3	NA	1	1: ICU	1	0	0	0	NA	0	0	0	11
5478	Good	hosp	1	NA	NA	NA	3	NA	1	NA	4	NA	3	NA	12.25	0	NA	3	walker	11.6	0	NA	3	walker	1	2	NA	NA	0	NA	3	NA	0	2: Hos	2	1	0	0	11.6	1	0	2	13
5478	Good	2m	1	NA	NA	NA	3	NA	1	NA	4	NA	3	NA	7.31	0	NA	2	NA	8.98	0	NA	2	NA	1	1	NA	NA	1	28.06	NA	NA	0	3: 2M	3	1	0	0	7.31	2	1	4	57
5478	Good	4m	1	NA	NA	NA	3	NA	1	NA	4	NA	4	NA	10.47	0	NA	1	NA	8.59	0	NA	1	NA	1	2	NA	NA	1	35.94	NA	NA	0	4: 4M	4	1	0	0	8.59	2	1	4	122
5478	Good	6m	1	NA	NA	NA	3	NA	4	NA	4	NA	4	NA	8.5	0	NA	1	NA	4.53	0	NA	1	NA	1	1	NA	NA	1	16.12	NA	NA	0	5: 6M	5	1	0	0	4.53	4	2	7	178
5579	Good	icu	3	NA	4	NA	3	NA	4	NA	4	NA	3	NA	NA	3	NA	NA	NA	NA	3	NA	NA	NA	0	3	3	NA	0	NA	3	NA	1	1: ICU	1	0	0	0	NA	0	0	0	8
5579	Good	hosp	3	NA	1	NA	3	NA	3	NA	4	NA	3	NA	NA	3	NA	NA	NA	NA	3	NA	NA	NA	1	2	NA	NA	0	NA	3	NA	1	2: Hos	2	0	0	0	NA	0	0	0	10
5579	Good	2m	1	NA	NA	NA	2	8.84	NA	NA	4	NA	4	NA	8.84	0	NA	1	NA	7.25	0	NA	1	NA	1	1	NA	NA	1	14.41	NA	NA	0	3: 2M	3	1	0	0	7.25	2	2	5	58
5579	Good	4m	1	NA	NA	NA	1	NA	NA	NA	3	2.22	NA	NA	6.94	0	NA	1	NA	7.15	0	NA	1	NA	1	1	NA	NA	1	13.69	NA	NA	0	4: 4M	4	1	1	0	6.94	2	3	7	118
5579	Good	6m	1	NA	NA	NA	2	7.53	NA	NA	3	2	NA	NA	7.19	0	NA	1	NA	6.88	0	NA	1	NA	1	1	NA	NA	1	11	NA	NA	0	5: 6M	5	1	0	0	6.88	2	4	7	189
5810	Good	icu	3	NA	5	NA	3	NA	5	NA	4	NA	5	NA	NA	5	NA	NA	NA	NA	5	NA	NA	NA	0	3	5	NA	0	NA	5	NA	1	1: ICU	1	0	0	0	NA	0	0	0	22
5810	Good	2m	3	NA	1	NA	3	NA	4	NA	4	NA	4	NA	9.63	0	NA	3	Walker	9.65	0	NA	3	Walker	1	2	NA	NA	0	NA	3	NA	0	3: 2M	3	0	0	0	9.63	1	0	1	89
5810	Good	4m	1	NA	NA	NA	2	1.75	NA	NA	3	1.75	NA	NA	7.56	0	NA	3	Walker	5.9	0	NA	3	Walker	1	1	NA	NA	1	12.22	NA	NA	0	4: 4M	4	1	0	0	5.9	3	3	7	127
5810	Good	6m	1	NA	NA	NA	1	NA	NA	NA	1	NA	NA	NA	5.47	0	NA	1	NA	4.35	0	NA	1	NA	1	1	NA	NA	1	20.22	NA	NA	0	5: 6M	5	1	1	2	4.35	4	1	9	187
5869	Good	icu	3	NA	3	NA	3	NA	3	NA	4	NA	3	NA	NA	3	NA	NA	NA	NA	3	NA	NA	NA	0	3	3	NA	0	NA	3	NA	1	1: ICU	1	0	0	0	NA	0	0	0	9
5869	Good	hosp	3	NA	3	NA	3	NA	3	NA	4	NA	3	NA	NA	3	NA	NA	NA	NA	3	NA	NA	NA	1	2	NA	NA	0	NA	3	NA	1	2: Hos	2	0	0	0	NA	0	0	0	11
5869	Good	2m	1	NA	NA	NA	1	NA	NA	NA	1	NA	NA	NA	6.41	0	NA	1	NA	5.4	0	NA	1	NA	1	1	NA	NA	1	12.62	NA	NA	0	3: 2M	3	1	1	2	5.4	3	3	10	59
5869	Good	4m	1	NA	NA	NA	1	NA	NA	NA	3	NA	NA	NA	5	0	NA	1	NA	4.59	0	NA	1	NA	1	1	NA	NA	1	14.75	NA	NA	0	4: 4M	4	1	1	0	4.59	4	2	8	119
5869	Good	6m	1	NA	NA	NA	1	NA	NA	NA	3	NA	NA	NA	5.84	0	NA	1	NA	5.37	0	NA	1	NA	1	1	NA	NA	1	15.69	NA	NA	0	5: 6M	5	1	1	0	5.37	3	2	7	184
5993	Good	icu	1	NA	NA	NA	2	2.63	NA	NA	4	NA	3	NA	NA	3	NA	NA	NA	NA	3	NA	NA	NA	0	3	3	NA	0	NA	3	NA	1	1: ICU	1	1	0	0	NA	0	0	1	7
5993	Good	hosp	1	NA	NA	NA	1	NA	NA	NA	1	NA	NA	NA	15.65	0	NA	1	NA	11.75	0	NA	1	NA	0	2	NA	NA	0	NA	3	NA	0	2: Hos	2	1	1	2	11.75	1	0	5	9
5993	Good	2m	1	NA	NA	NA	1	NA	NA	NA	1	NA	NA	NA	4.16	0	NA	1	NA	3.94	0	NA	1	NA	1	1	NA	NA	1	9.47	NA	NA	0	3: 2M	3	1	1	2	3.94	4	4	12	57
5993	Good	4m	1	NA	NA	NA	1	NA	NA	NA	1	NA	NA	NA	4.06	0	NA	1	NA	3.59	0	NA	1	NA	1	1	NA	NA	1	10.53	NA	NA	0	4: 4M	4	1	1	2	3.59	4	4	12	115
5993	Good	6m	1	NA	NA	NA	1	NA	NA	NA	1	NA	NA	NA	3.97	0	NA	1	NA	3.66	0	NA	1	NA	1	1	NA	NA	1	10.12	NA	NA	0	5: 6M	5	1	1	2	3.66	4	4	12	178
6283	Good	icu	1	NA	NA	NA	2	5.66	NA	NA	4	NA	3	NA	NA	3	NA	NA	NA	NA	3	NA	NA	NA	1	1	NA	NA	0	NA	3	NA	1	1: ICU	1	1	0	0	NA	0	0	1	3
6283	Good	2m	1	NA	NA	NA	1	NA	NA	NA	2	5.09	NA	NA	6.34	0	NA	1	NA	5.59	0	NA	1	NA	1	1	NA	NA	1	18.93	NA	NA	0	3: 2M	3	1	1	1	5.59	3	1	7	59
6283	Good	4m	1	NA	NA	NA	1	NA	NA	NA	2	5.68	NA	NA	4.06	0	NA	1	NA	4.35	0	NA	1	NA	1	1	NA	NA	1	8.72	NA	NA	0	4: 4M	4	1	1	1	4.06	4	4	11	124
6283	Good	6m	1	NA	NA	NA	1	NA	NA	NA	1	NA	NA	NA	4.72	0	NA	1	NA	5.16	0	NA	1	NA	1	1	NA	NA	1	10.09	NA	NA	0	5: 6M	5	1	1	2	4.72	4	4	12	185
6381	Good	icu	1	NA	NA	NA	2	2.94	NA	NA	4	NA	3	NA	NA	3	NA	NA	NA	NA	3	NA	NA	NA	1	2	NA	NA	0	NA	3	NA	1	1: ICU	1	1	0	0	NA	0	0	1	4
6381	Good	hosp	1	NA	NA	NA	2	6.31	NA	NA	4	NA	3	NA	NA	3	NA	NA	NA	NA	3	NA	NA	NA	1	2	NA	NA	0	NA	3	NA	1	2: Hos	2	1	0	0	NA	0	0	1	7
6381	Good	2m	1	NA	NA	NA	2	9.22	NA	NA	1	NA	NA	NA	7.5	0	NA	1	NA	6.4	0	NA	1	NA	1	1	NA	NA	1	27.22	NA	NA	0	3: 2M	3	1	0	0	6.4	2	1	4	81
6381	Good	4m	1	NA	NA	NA	1	NA	NA	NA	1	NA	NA	NA	5.72	0	NA	1	NA	6.56	0	NA	1	NA	1	1	NA	NA	1	18.37	NA	NA	0	4: 4M	4	1	1	2	5.72	3	1	8	140
6381	Good	6m	1	NA	NA	NA	1	NA	NA	NA	1	NA	NA	NA	7.46	0	NA	1	NA	6.54	0	NA	1	NA	1	1	NA	NA	1	18.18	NA	NA	0	5: 6M	5	1	1	2	6.54	2	1	7	186
6484	Poor	icu	3	NA	3	NA	3	NA	3	NA	4	NA	3	NA	NA	3	NA	NA	NA	NA	3	NA	NA	NA	0	3	3	NA	0	NA	3	NA	1	1: ICU	1	0	0	0	NA	0	0	0	2
6484	Poor	2m	1	NA	NA	NA	1	NA	NA	NA	4	NA	2	NA	13.31	0	NA	1	NA	12.13	0	NA	1	NA	0	NA	3	NA	0	NA	3	NA	0	3: 2M	3	1	1	0	12.13	1	0	3	78
6484	Poor	4m	3	NA	3	NA	3	NA	3	NA	4	NA	3	NA	NA	3	NA	NA	NA	NA	3	NA	NA	NA	0	3	3	NA	0	NA	3	NA	1	4: 4M	4	0	0	0	NA	0	0	0	123
6484	Poor	6m	3	NA	3	NA	3	NA	3	NA	4	NA	3	NA	NA	6	NA	NA	NA	NA	6	NA	NA	NA	0	3	3	NA	0	NA	3	NA	1	5: 6M	5	0	0	0	NA	0	0	0	182
6536	Poor	icu	3	NA	3	NA	3	NA	3	NA	4	NA	3	NA	NA	3	NA	NA	NA	NA	3	NA	NA	NA	0	3	3	NA	0	NA	3	NA	1	1: ICU	1	0	0	0	NA	0	0	0	9
6536	Poor	hosp	1	NA	NA	NA	1	NA	NA	NA	3	NA	NA	NA	7.38	0	NA	1	NA	6.09	0	NA	1	NA	1	1	NA	NA	1	17.06	NA	NA	0	2: Hos	2	1	1	0	6.09	3	1	6	16
6536	Poor	2m	1	NA	NA	NA	1	NA	NA	NA	1	NA	NA	NA	4.75	0	NA	1	NA	4.69	0	NA	1	NA	1	1	NA	NA	1	15.75	NA	NA	0	3: 2M	3	1	1	2	4.69	4	2	10	67
6536	Poor	4m	1	NA	NA	NA	1	NA	NA	NA	1	NA	NA	NA	4.69	0	NA	1	NA	3.75	0	NA	1	NA	1	1	NA	NA	1	24.69	NA	NA	0	4: 4M	4	1	1	2	3.75	4	1	9	130
6536	Poor	6m	1	NA	NA	NA	1	NA	NA	NA	4	NA	3	NA	8.25	0	NA	1	NA	7.68	0	NA	1	NA	1	1	NA	NA	1	14.62	NA	NA	0	5: 6M	5	1	1	0	7.68	2	2	6	205
6543	Poor	icu	3	NA	3	NA	3	NA	3	NA	4	NA	3	NA	NA	3	NA	NA	NA	NA	3	NA	NA	NA	0	3	3	NA	0	NA	3	NA	1	1: ICU	1	0	0	0	NA	0	0	0	7
6543	Poor	hosp	1	NA	NA	NA	1	NA	NA	NA	4	NA	1	NA	9.56	0	NA	1	NA	8.97	0	NA	1	NA	1	1	NA	NA	1	25.78	NA	NA	0	2: Hos	2	1	1	0	8.97	1	1	4	11
6543	Poor	2m	1	NA	NA	NA	2	6.75	NA	NA	1	NA	NA	NA	7.28	0	NA	1	NA	7.16	0	NA	1	NA	1	1	NA	NA	1	20.67	NA	NA	0	3: 2M	3	1	0	0	7.16	2	1	4	66
6543	Poor	4m	1	NA	NA	NA	1	NA	NA	NA	1	NA	NA	NA	5.85	0	NA	1	NA	5.5	0	NA	1	NA	1	1	NA	NA	1	20.22	NA	NA	0	4: 4M	4	1	1	2	5.5	3	1	8	134
6543	Poor	6m	1	NA	NA	NA	1	NA	NA	NA	2	8.35	NA	NA	11.59	0	NA	1	NA	10.49	0	NA	1	NA	1	1	NA	NA	1	21.28	NA	NA	0	5: 6M	5	1	1	1	10.49	1	1	5	186
6946	Poor	icu	3	NA	3	NA	3	NA	3	NA	4	NA	3	NA	NA	3	NA	NA	NA	NA	3	NA	NA	NA	0	3	3	NA	0	NA	3	NA	1	1: ICU	1	0	0	0	NA	0	0	0	7
6946	Poor	hosp	2	3.91	NA	NA	3	NA	3	NA	4	NA	3	NA	13.91	0	NA	3	EP and nurse hand	14.94	0	NA	3	EP and nurse hand	1	2	NA	NA	0	NA	3	NA	0	2: Hos	2	0	0	0	13.91	1	0	1	9
6946	Poor	4m	3	NA	3	NA	3	NA	3	NA	4	NA	3	NA	NA	3	NA	NA	NA	NA	3	NA	NA	NA	0	3	3	NA	0	NA	3	NA	1	4: 4M	4	0	0	0	NA	0	0	0	87
6946	Poor	6m	1	NA	NA	NA	3	NA	4	NA	4	NA	4	NA	13.86	0	NA	3	Walker	14.57	0	NA	3	Walker	1	2	NA	NA	1	55.41	NA	NA	0	5: 6M	5	1	0	0	13.86	1	1	3	170
7000	Poor	hosp	1	NA	NA	NA	1	NA	NA	NA	2	7.47	NA	NA	6.1	0	NA	1	NA	6.56	0	NA	1	NA	1	1	NA	NA	1	8.78	NA	NA	0	2: Hos	2	1	1	1	6.1	3	4	10	3
7000	Poor	2m	1	NA	NA	NA	1	NA	NA	NA	2	3	NA	NA	4.65	0	NA	1	NA	4.72	0	NA	1	NA	1	1	NA	NA	1	17.34	NA	NA	0	3: 2M	3	1	1	1	4.65	4	1	8	50
7000	Poor	4m	1	NA	NA	NA	1	NA	NA	NA	1	NA	NA	NA	4.25	0	NA	1	NA	4.18	0	NA	1	NA	1	1	NA	NA	1	12	NA	NA	0	4: 4M	4	1	1	2	4.18	4	3	11	106
7000	Poor	6m	1	NA	NA	NA	1	NA	NA	NA	3	1.37	NA	NA	5.28	0	NA	1	NA	5.75	0	NA	1	NA	1	1	NA	NA	0	NA	6	NA	0	5: 6M	5	1	1	0	5.28	3	0	5	171
7181	Poor	icu	1	NA	NA	NA	3	NA	1	NA	4	NA	3	NA	13.88	0	NA	3	handrail	NA	1	NA	NA	NA	1	2	NA	NA	0	NA	6	NA	0	1: ICU	1	1	0	0	13.88	1	0	2	9
7181	Poor	hosp	1	NA	NA	NA	1	NA	NA	NA	2	7.35	NA	NA	8.44	0	NA	NA	NA	6.87	0	NA	NA	NA	1	1	NA	NA	1	18.75	NA	NA	0	2: Hos	2	1	1	1	6.87	2	1	6	12
7181	Poor	4m	1	NA	NA	NA	1	NA	NA	NA	1	NA	NA	NA	7.94	0	NA	1	NA	8.54	0	NA	1	NA	1	2	NA	NA	1	57.75	NA	NA	0	4: 4M	4	1	1	2	7.94	2	1	7	117
7181	Poor	6m	1	NA	NA	NA	3	NA	4	NA	4	NA	4	NA	8.13	0	NA	1	NA	6.17	0	NA	1	NA	1	1	NA	NA	1	30.59	NA	NA	0	5: 6M	5	1	0	0	6.17	3	1	5	171
7236	Good	icu	3	NA	3	NA	3	NA	3	NA	4	NA	3	NA	NA	3	NA	NA	NA	NA	3	NA	NA	NA	0	3	3	NA	0	NA	3	NA	1	1: ICU	1	0	0	0	NA	0	0	0	3
7236	Good	hosp	1	NA	NA	NA	1	NA	NA	NA	1	NA	NA	NA	4.72	0	NA	1	NA	4.69	0	NA	1	NA	1	2	NA	NA	0	NA	3	NA	0	2: Hos	2	1	1	2	4.69	4	0	8	9
7236	Good	2m	1	NA	NA	NA	1	NA	NA	NA	1	NA	NA	NA	7	0	NA	1	NA	7.79	0	NA	1	NA	1	1	NA	NA	1	12.91	NA	NA	0	3: 2M	3	1	1	2	7	2	3	9	55
7236	Good	4m	1	NA	NA	NA	1	NA	NA	NA	1	NA	NA	NA	4	0	NA	1	NA	3.59	0	NA	1	NA	1	1	NA	NA	1	10.06	NA	NA	0	4: 4M	4	1	1	2	3.59	4	4	12	107
7236	Good	6m	1	NA	NA	NA	1	NA	NA	NA	1	NA	NA	NA	3.56	0	NA	1	NA	3.47	0	NA	1	NA	1	1	NA	NA	1	10.81	NA	NA	0	5: 6M	5	1	1	2	3.47	4	4	12	163
7451	Good	icu	3	NA	3	NA	3	NA	3	NA	4	NA	3	NA	NA	3	NA	NA	NA	NA	3	NA	NA	NA	0	3	3	NA	0	NA	NA	NA	1	1: ICU	1	0	0	0	NA	0	0	0	3
7451	Good	hosp	1	NA	NA	NA	1	NA	NA	NA	1	NA	NA	NA	4.06	0	NA	1	NA	3.96	0	NA	1	NA	1	1	NA	NA	1	15.3	NA	NA	0	2: Hos	2	1	1	2	3.96	4	2	10	6
7451	Good	2m	1	NA	NA	NA	1	NA	NA	NA	1	NA	NA	NA	3.94	0	NA	1	NA	3.37	0	NA	1	NA	1	1	NA	NA	1	9.85	NA	NA	0	3: 2M	3	1	1	2	3.37	4	4	12	76
7451	Good	4m	1	NA	NA	NA	1	NA	NA	NA	1	NA	NA	NA	3.34	0	NA	1	NA	3.34	0	NA	1	NA	1	1	NA	NA	1	14.91	NA	NA	0	4: 4M	4	1	1	2	3.34	4	2	10	113
7451	Good	6m	1	NA	NA	NA	1	NA	NA	NA	2	3.44	NA	NA	3.44	0	NA	1	NA	3.25	0	NA	1	NA	1	1	NA	NA	1	16.31	NA	NA	0	5: 6M	5	1	1	1	3.25	4	2	9	171
7647	Good	hosp	1	NA	NA	NA	1	NA	NA	NA	1	NA	NA	NA	7.97	0	NA	1	NA	8.18	0	NA	1	NA	1	1	NA	NA	1	25.19	NA	NA	0	2: Hos	2	1	1	2	7.97	2	1	7	7
7647	Good	6m	1	NA	NA	NA	1	NA	NA	NA	1	NA	NA	NA	5.44	0	NA	1	NA	5.42	0	NA	1	NA	1	1	NA	NA	1	12.22	NA	NA	0	5: 6M	5	1	1	2	5.42	3	3	10	171
7816	Poor	icu	3	NA	3	NA	3	NA	3	NA	4	NA	3	NA	NA	3	NA	NA	NA	NA	3	NA	NA	NA	0	3	3	NA	0	NA	3	NA	1	1: ICU	1	0	0	0	NA	0	0	0	4
7816	Poor	hosp	1	NA	NA	NA	1	NA	NA	NA	1	NA	NA	NA	4.84	0	NA	1	NA	5.72	0	NA	1	NA	1	1	NA	NA	1	NA	1	NA	0	2: Hos	2	1	1	2	4.84	3	0	7	13
7816	Poor	2m	1	NA	NA	NA	1	NA	NA	NA	1	NA	NA	NA	3.97	0	NA	1	NA	4.03	0	NA	1	NA	1	1	NA	NA	1	19.28	NA	NA	0	3: 2M	3	1	1	2	3.97	4	1	9	50
7816	Poor	4m	1	NA	NA	NA	1	NA	NA	NA	1	NA	NA	NA	3.56	0	NA	1	NA	3.35	0	NA	1	NA	1	1	NA	NA	1	15.13	NA	NA	0	4: 4M	4	1	1	2	3.35	4	2	10	111
7816	Poor	6m	3	NA	6	NA	3	NA	6	NA	4	NA	6	NA	NA	6	NA	NA	NA	NA	6	NA	NA	NA	1	2	NA	NA	0	NA	6	NA	1	5: 6M	5	0	0	0	NA	0	0	0	174
7837	Poor	icu	1	NA	NA	NA	1	NA	NA	NA	2	4.72	NA	NA	NA	3	NA	NA	NA	NA	3	NA	NA	NA	0	2	NA	NA	0	NA	3	NA	1	1: ICU	1	1	1	1	NA	0	0	3	5
7837	Poor	hosp	1	NA	NA	NA	1	NA	NA	NA	1	NA	NA	NA	5.81	0	NA	1	NA	4.69	0	NA	1	NA	1	1	NA	NA	1	17.93	NA	NA	0	2: Hos	2	1	1	2	4.69	4	1	9	11
7837	Poor	6m	3	NA	3	NA	3	NA	3	NA	4	NA	3	NA	NA	3	NA	NA	NA	NA	3	NA	NA	NA	0	3	3	NA	0	NA	3	NA	1	5: 6M	5	0	0	0	NA	0	0	0	173
8059	Good	icu	3	NA	3	NA	3	NA	3	NA	4	NA	3	NA	NA	3	NA	NA	NA	NA	3	NA	NA	NA	0	3	3	NA	0	NA	3	NA	1	1: ICU	1	0	0	0	NA	0	0	0	8
8059	Good	hosp	2	1.28	NA	NA	3	NA	3	NA	4	NA	3	NA	NA	3	NA	NA	NA	NA	3	NA	NA	NA	0	3	3	NA	0	NA	3	NA	1	2: Hos	2	0	0	0	NA	0	0	0	19
8059	Good	2m	1	NA	NA	NA	1	NA	NA	NA	1	NA	NA	NA	3.47	0	NA	1	NA	3.69	0	NA	1	NA	1	1	NA	NA	1	15.12	NA	NA	0	3: 2M	3	1	1	2	3.47	4	2	10	48
8059	Good	4m	1	NA	NA	NA	1	NA	NA	NA	1	NA	NA	NA	3.06	0	NA	1	NA	3.16	0	NA	1	NA	1	1	NA	NA	1	13.41	NA	NA	0	4: 4M	4	1	1	2	3.06	4	3	11	111
8059	Good	6m	1	NA	NA	NA	1	NA	NA	NA	1	NA	NA	NA	4.03	0	NA	1	NA	3.87	0	NA	1	NA	1	1	NA	NA	1	15.07	NA	NA	0	5: 6M	5	1	1	2	3.87	4	2	10	174
8202	Poor	icu	3	NA	3	NA	3	NA	3	NA	4	NA	3	NA	NA	3	NA	NA	NA	NA	3	NA	NA	NA	0	3	3	NA	0	NA	3	NA	1	1: ICU	1	0	0	0	NA	0	0	0	8
8202	Poor	hosp	3	NA	6	NA	3	NA	6	NA	4	NA	6	NA	NA	6	NA	NA	NA	NA	6	NA	NA	NA	0	3	6	NA	0	NA	6	NA	1	2: Hos	2	0	0	0	NA	0	0	0	27
8202	Poor	2m	1	NA	NA	NA	1	NA	NA	NA	1	NA	NA	NA	4.5	0	NA	1	NA	5.15	0	NA	1	NA	1	1	NA	NA	1	18.57	NA	NA	0	3: 2M	3	1	1	2	4.5	4	1	9	53
8202	Poor	4m	3	NA	3	NA	3	NA	3	NA	4	NA	3	NA	NA	3	NA	NA	NA	NA	3	NA	NA	NA	0	3	3	NA	0	NA	3	NA	1	4: 4M	4	0	0	0	NA	0	0	0	109
8202	Poor	6m	3	NA	3	NA	3	NA	3	NA	4	NA	3	NA	NA	3	NA	NA	NA	NA	3	NA	NA	NA	1	2	NA	NA	0	NA	3	NA	1	5: 6M	5	0	0	0	NA	0	0	0	179
8739	Good	icu	3	NA	3	NA	3	NA	3	NA	4	NA	3	NA	NA	3	NA	NA	NA	NA	3	NA	NA	NA	0	3	3	NA	0	NA	3	NA	1	1: ICU	1	0	0	0	NA	0	0	0	290
8739	Good	hosp	3	NA	3	NA	3	NA	3	NA	4	NA	3	NA	NA	3	NA	NA	NA	NA	3	NA	NA	NA	0	3	3	NA	0	NA	3	NA	1	2: Hos	2	0	0	0	NA	0	0	0	10
8739	Good	2m	1	NA	NA	NA	1	NA	NA	NA	1	NA	NA	NA	6.34	0	NA	1	NA	5.91	0	NA	1	NA	1	1	NA	NA	1	12.78	NA	NA	0	3: 2M	3	1	1	2	5.91	3	3	10	50
8739	Good	4m	1	NA	NA	NA	1	NA	NA	NA	1	NA	NA	NA	7.63	0	NA	1	NA	9.82	0	NA	1	NA	1	1	NA	NA	1	15.91	NA	NA	0	4: 4M	4	1	1	2	7.63	2	2	8	107
8739	Good	6m	1	NA	NA	NA	1	NA	NA	NA	1	NA	NA	NA	4.5	0	NA	1	NA	4.15	0	NA	1	NA	1	1	NA	NA	1	14.15	NA	NA	0	5: 6M	5	1	1	2	4.15	4	2	10	163
8740	Poor	icu	1	NA	NA	NA	1	NA	NA	NA	3	NA	NA	NA	7.53	0	NA	2	NA	6.25	0	NA	2	NA	0	3	6	NA	0	NA	3	NA	0	1: ICU	1	1	1	0	6.25	2	0	4	4
8740	Poor	hosp	1	NA	NA	NA	2	6.85	NA	NA	4	NA	3	NA	5.28	0	NA	2	NA	4.88	0	NA	1	NA	0	3	3	NA	0	NA	3	NA	0	2: Hos	2	1	0	0	4.88	3	0	4	8
8740	Poor	2m	1	NA	NA	NA	1	NA	NA	NA	1	NA	NA	NA	5.41	0	NA	2	NA	5.91	0	NA	2	NA	1	1	NA	NA	0	NA	1	NA	0	3: 2M	3	1	1	2	5.41	3	0	7	43
8740	Poor	4m	3	NA	3	NA	3	NA	3	NA	4	NA	3	NA	NA	3	NA	NA	NA	NA	3	NA	NA	NA	0	3	3	NA	0	NA	3	NA	1	4: 4M	4	0	0	0	NA	0	0	0	113
8740	Poor	6m	3	NA	3	NA	3	NA	3	NA	4	NA	3	NA	NA	3	NA	NA	NA	NA	3	NA	NA	NA	0	3	3	NA	0	NA	3	NA	1	5: 6M	5	0	0	0	NA	0	0	0	162
8753	Good	icu	3	NA	3	NA	3	NA	3	NA	4	NA	3	NA	NA	3	NA	NA	NA	NA	3	NA	NA	NA	0	3	3	NA	0	NA	3	NA	1	1: ICU	1	0	0	0	NA	0	0	0	3
8753	Good	hosp	1	NA	NA	NA	1	NA	NA	NA	4	NA	1	NA	15.5	0	NA	3	tester hand	12.41	0	NA	3	tester hand	1	2	NA	NA	0	NA	3	NA	0	2: Hos	2	1	1	0	12.41	1	0	3	5
8753	Good	2m	1	NA	NA	NA	1	NA	NA	NA	1	NA	NA	NA	4.65	0	NA	1	NA	4.6	0	NA	1	NA	1	1	NA	NA	0	NA	6	NA	0	3: 2M	3	1	1	2	4.6	4	0	8	42
8753	Good	4m	1	NA	NA	NA	1	NA	NA	NA	1	NA	NA	NA	3.78	0	NA	1	NA	3.68	0	NA	1	NA	1	1	NA	NA	1	18.81	NA	NA	0	4: 4M	4	1	1	2	3.68	4	1	9	106
8753	Good	6m	1	NA	NA	NA	1	NA	NA	NA	1	NA	NA	NA	3.82	0	NA	1	NA	4.22	0	NA	1	NA	1	1	NA	NA	1	21.25	NA	NA	0	5: 6M	5	1	1	2	3.82	4	1	9	168
8833	Good	icu	3	NA	3	NA	3	NA	3	NA	4	NA	3	NA	NA	3	NA	NA	NA	NA	3	NA	NA	NA	0	3	3	NA	0	NA	3	NA	1	1: ICU	1	0	0	0	NA	0	0	0	9
8833	Good	hosp	1	NA	NA	NA	1	NA	NA	NA	4	NA	1	NA	9.47	0	NA	1	NA	8.41	0	NA	1	NA	1	1	NA	NA	1	14.5	NA	NA	0	2: Hos	2	1	1	0	8.41	2	2	6	12
8833	Good	2m	1	NA	NA	NA	1	NA	NA	NA	1	NA	NA	NA	5.6	0	NA	1	NA	5.3	0	NA	1	NA	1	1	NA	NA	1	13.7	NA	NA	0	3: 2M	3	1	1	2	5.3	3	2	9	43
8833	Good	4m	1	NA	NA	NA	1	NA	NA	NA	1	NA	NA	NA	4.5	0	NA	1	NA	4.07	0	NA	1	NA	1	1	NA	NA	1	12.35	NA	NA	0	4: 4M	4	1	1	2	4.07	4	3	11	99
8833	Good	6m	1	NA	NA	NA	1	NA	NA	NA	1	NA	NA	NA	5.39	0	NA	1	NA	5.18	0	NA	1	NA	1	1	NA	NA	1	11.66	NA	NA	0	5: 6M	5	1	1	2	5.18	3	3	10	169
9270	Poor	icu	3	NA	3	NA	3	NA	3	NA	4	NA	3	NA	NA	3	NA	NA	NA	NA	3	NA	NA	NA	0	3	3	NA	0	NA	3	NA	1	1: ICU	1	0	0	0	NA	0	0	0	5
9270	Poor	hosp	3	NA	3	NA	3	NA	3	NA	4	NA	3	NA	NA	3	NA	NA	NA	NA	3	NA	NA	NA	NA	3	3	NA	NA	NA	3	NA	1	2: Hos	2	0	0	0	NA	0	0	0	5
9270	Poor	2m	1	NA	NA	NA	1	NA	NA	NA	3	NA	2	NA	7.37	0	NA	3	walker	9.38	0	NA	3	walker	1	2	NA	NA	0	NA	4	NA	0	3: 2M	3	1	1	0	7.37	2	0	4	47
9270	Poor	4m	3	NA	7	R foot amputated	3	NA	7	R foot amputated	4	NA	7	R foot ampuated	NA	7	R foot amputated	NA	NA	NA	7	R foot amputated	NA	NA	0	3	7	R foot amputated	0	NA	7	R foot amputated	1	4: 4M	4	0	0	0	NA	0	0	0	123
9270	Poor	6m	3	NA	7	R leg amputation	3	NA	7	R leg amputation	4	NA	7	R leg amputation	NA	7	R leg amputation	NA	NA	NA	7	R leg amputation	NA	NA	0	3	7	R leg amputation	0	NA	7	R leg amputation	1	5: 6M	5	0	0	0	NA	0	0	0	173
9341	Good	icu	3	NA	3	NA	3	NA	3	NA	4	NA	3	NA	NA	5	NA	NA	NA	NA	3	NA	NA	NA	0	3	3	NA	0	NA	3	NA	1	1: ICU	1	0	0	0	NA	0	0	0	1
9341	Good	2m	1	NA	NA	NA	1	NA	NA	NA	1	NA	NA	NA	4.6	0	NA	1	NA	4.19	0	NA	1	NA	1	1	NA	NA	1	11.07	NA	NA	0	3: 2M	3	1	1	2	4.19	4	4	12	49
9341	Good	6m	1	NA	NA	NA	1	NA	NA	NA	1	NA	NA	NA	4.75	0	NA	1	NA	5.07	0	NA	1	NA	1	1	NA	NA	1	19.75	NA	NA	0	5: 6M	5	1	1	2	4.75	4	1	9	186
9402	Poor	icu	3	NA	3	NA	3	NA	3	NA	4	NA	3	NA	NA	3	NA	NA	NA	NA	3	NA	NA	NA	0	3	3	NA	0	NA	3	NA	1	1: ICU	1	0	0	0	NA	0	0	0	5
9402	Poor	hosp	2	6.35	NA	NA	3	NA	3	NA	4	NA	3	NA	12	0	NA	1	NA	10.29	0	NA	1	NA	1	1	NA	NA	0	NA	6	NA	0	2: Hos	2	0	0	0	10.29	1	0	1	9
9402	Poor	2m	1	NA	NA	NA	2	4.47	NA	NA	4	NA	3	NA	11.5	0	NA	1	NA	9.97	0	NA	1	NA	1	1	NA	NA	1	16.75	NA	NA	0	3: 2M	3	1	0	0	9.97	1	1	3	50
9402	Poor	4m	1	NA	NA	NA	1	NA	NA	NA	4	NA	1	NA	4.13	0	NA	1	NA	4.87	0	NA	1	NA	1	1	NA	NA	1	16.31	NA	NA	0	4: 4M	4	1	1	0	4.13	4	2	8	114
9402	Poor	6m	3	NA	3	NA	3	NA	3	NA	4	NA	3	NA	NA	3	NA	NA	NA	NA	3	NA	NA	NA	0	3	3	NA	0	NA	3	NA	1	5: 6M	5	0	0	0	NA	0	0	0	169
9707	Poor	icu	3	NA	3	NA	3	NA	3	NA	4	NA	3	NA	NA	3	NA	NA	NA	NA	3	NA	NA	NA	0	3	3	NA	0	NA	3	NA	1	1: ICU	1	0	0	0	NA	0	0	0	6
9707	Poor	hosp	3	NA	3	NA	3	NA	3	NA	4	NA	3	NA	NA	3	NA	NA	NA	NA	3	NA	NA	NA	0	3	3	NA	0	NA	3	NA	1	2: Hos	2	0	0	0	NA	0	0	0	14
9707	Poor	2m	1	NA	NA	NA	1	NA	NA	NA	2	4.09	NA	NA	15.37	0	NA	3	walker	15.7	0	NA	3	walker	1	1	NA	NA	1	14.58	NA	NA	0	3: 2M	3	1	1	1	15.37	1	2	6	72
9707	Poor	4m	1	NA	NA	NA	3	NA	1	NA	4	NA	1	NA	6.85	0	NA	1	NA	6.57	0	NA	1	NA	1	1	NA	NA	1	15.12	NA	NA	0	4: 4M	4	1	0	0	6.57	2	2	5	119
9707	Poor	6m	1	NA	NA	NA	1	NA	NA	NA	3	2.97	NA	NA	7.35	0	NA	1	NA	7.87	0	NA	1	NA	1	1	NA	NA	1	14.72	NA	NA	0	5: 6M	5	1	1	0	7.35	2	2	6	177
10106	Good	icu	1	NA	NA	NA	1	NA	NA	NA	2	5.12	NA	NA	6.09	0	NA	1	NA	5.22	0	NA	1	NA	1	1	NA	NA	1	34.06	NA	NA	0	1: ICU	1	1	1	1	5.22	3	1	7	4
10106	Good	hosp	1	NA	NA	NA	1	NA	NA	NA	2	3.12	NA	NA	5.03	0	NA	1	NA	6.03	0	NA	1	NA	1	1	NA	NA	1	20.91	NA	NA	0	2: Hos	2	1	1	1	5.03	3	1	7	7
10106	Good	2m	1	NA	NA	NA	1	NA	NA	NA	2	7.5	NA	NA	3.43	0	NA	1	NA	3.09	0	NA	1	NA	1	1	NA	NA	1	13.22	NA	NA	0	3: 2M	3	1	1	1	3.09	4	3	10	59
10106	Good	4m	1	NA	NA	NA	1	NA	NA	NA	3	1.47	NA	NA	2.82	0	NA	1	NA	2.53	0	NA	1	NA	1	1	NA	NA	1	8.63	NA	NA	0	4: 4M	4	1	1	0	2.53	4	4	10	106
10106	Good	6m	1	NA	NA	NA	1	NA	NA	NA	3	1.57	NA	NA	2.6	0	NA	1	NA	2.65	0	NA	1	NA	1	1	NA	NA	1	9.31	NA	NA	0	5: 6M	5	1	1	0	2.6	4	4	10	169
10230	Poor	icu	3	NA	5	NA	3	NA	5	NA	4	NA	5	NA	NA	5	NA	NA	NA	NA	5	NA	NA	NA	0	3	5	NA	0	NA	5	NA	1	1: ICU	1	0	0	0	NA	0	0	0	8
10230	Poor	hosp	3	NA	3	NA	3	NA	3	NA	4	NA	3	NA	NA	3	NA	NA	NA	NA	3	NA	NA	NA	0	3	3	NA	0	NA	3	NA	1	2: Hos	2	0	0	0	NA	0	0	0	36
10230	Poor	4m	3	NA	4	NA	3	NA	4	NA	4	NA	4	NA	10.6	0	NA	3	Walker	9.75	0	NA	3	Walker	0	3	4	NA	0	NA	4	NA	0	4: 4M	4	0	0	0	9.75	1	0	1	129
10230	Poor	4m	3	NA	4	NA	3	NA	4	NA	4	NA	4	NA	10.6	0	NA	3	Walker	9.75	0	NA	3	Walker	0	3	4	NA	0	NA	4	NA	0	4: 4M	4	0	0	0	9.75	1	0	1	128
10230	Poor	6m	1	NA	NA	NA	2	6.82	NA	NA	4	NA	6	NA	12.42	0	NA	3	Walker	NA	6	NA	NA	NA	1	1	NA	NA	1	17.43	NA	NA	0	5: 6M	5	1	0	0	12.42	1	1	3	178
10362	Good	hosp	1	NA	NA	NA	1	NA	NA	NA	1	NA	NA	NA	11.16	0	NA	1	NA	9.53	0	NA	1	NA	1	1	NA	NA	1	15.06	NA	NA	0	2: Hos	2	1	1	2	9.53	1	2	7	2
10362	Good	2m	1	NA	NA	NA	1	NA	NA	NA	1	NA	NA	NA	5.97	0	NA	1	NA	5.22	0	NA	1	NA	1	1	NA	NA	1	11.12	NA	NA	0	3: 2M	3	1	1	2	5.22	3	4	11	57
10362	Good	4m	1	NA	NA	NA	1	NA	NA	NA	1	NA	NA	NA	5.28	0	NA	1	NA	4.75	0	NA	1	NA	1	1	NA	NA	1	11.35	NA	NA	0	4: 4M	4	1	1	2	4.75	4	3	11	113
10362	Good	6m	1	NA	NA	NA	1	NA	NA	NA	2	7.78	NA	NA	4	0	NA	1	NA	4.15	0	NA	1	NA	1	1	NA	NA	1	11.37	NA	NA	0	5: 6M	5	1	1	1	4	4	3	10	196
11103	Good	icu	1	NA	NA	NA	1	NA	NA	NA	1	NA	NA	NA	NA	3	NA	NA	NA	NA	3	NA	NA	NA	0	3	3	NA	0	NA	3	NA	1	1: ICU	1	1	1	2	NA	0	0	4	5
11103	Good	hosp	1	NA	NA	NA	1	NA	NA	NA	2	4.1	NA	NA	NA	4	NA	NA	NA	NA	4	NA	NA	NA	0	3	4	NA	0	NA	4	NA	1	2: Hos	2	1	1	1	NA	0	0	3	11
11103	Good	2m	1	NA	NA	NA	1	NA	NA	NA	3	1.97	NA	NA	8.09	0	NA	1	NA	7.13	0	NA	1	NA	1	1	NA	NA	1	16.25	NA	NA	0	3: 2M	3	1	1	0	7.13	2	2	6	53
11103	Good	4m	1	NA	NA	NA	1	NA	NA	NA	2	4.31	NA	NA	8.04	0	NA	1	NA	7.09	0	NA	1	NA	1	1	NA	NA	1	13.1	NA	NA	0	4: 4M	4	1	1	1	7.09	2	3	8	124
11103	Good	6m	1	NA	NA	NA	1	NA	NA	NA	1	NA	NA	NA	9.85	0	NA	1	NA	9.72	0	NA	1	NA	1	1	NA	NA	1	13.53	NA	NA	0	5: 6M	5	1	1	2	9.72	1	3	8	175
11188	Poor	icu	3	NA	3	NA	3	NA	3	NA	4	NA	3	NA	NA	3	NA	NA	NA	NA	3	NA	NA	NA	0	3	3	NA	0	NA	3	NA	1	1: ICU	1	0	0	0	NA	0	0	0	4
11188	Poor	2m	3	NA	6	NA	3	NA	6	NA	4	NA	6	NA	NA	6	NA	NA	NA	NA	6	NA	NA	NA	0	3	6	NA	0	NA	6	NA	1	3: 2M	3	0	0	0	NA	0	0	0	54
11188	Poor	6m	3	NA	3	NA	3	NA	3	NA	4	NA	3	NA	NA	3	NA	NA	NA	NA	3	NA	NA	NA	1	2	NA	NA	0	NA	3	NA	1	5: 6M	5	0	0	0	NA	0	0	0	170
11389	Good	hosp	2	1.66	NA	NA	3	NA	3	NA	4	NA	3	NA	NA	3	NA	NA	NA	NA	3	NA	NA	NA	1	2	NA	NA	0	NA	3	NA	1	2: Hos	2	0	0	0	NA	0	0	0	7
11389	Good	2m	3	NA	3	NA	3	NA	3	NA	4	NA	3	NA	NA	3	NA	NA	NA	NA	3	NA	NA	NA	0	3	3	NA	0	NA	3	NA	1	3: 2M	3	0	0	0	NA	0	0	0	48
11389	Good	4m	1	NA	NA	NA	1	NA	NA	NA	4	NA	3	NA	NA	3	NA	NA	NA	NA	3	NA	NA	NA	1	1	NA	NA	0	NA	3	NA	1	4: 4M	4	1	1	0	NA	0	0	2	113
11389	Good	6m	1	NA	NA	NA	1	NA	NA	NA	2	5	NA	NA	4.85	0	NA	1	NA	4.63	0	NA	1	NA	1	1	NA	NA	1	11.53	NA	NA	0	5: 6M	5	1	1	1	4.63	4	3	10	183
11795	Good	hosp	3	NA	3	NA	3	NA	3	NA	4	NA	3	NA	NA	3	NA	NA	NA	NA	3	NA	NA	NA	0	3	3	NA	0	NA	3	NA	1	2: Hos	2	0	0	0	NA	0	0	0	7
11795	Good	2m	1	NA	NA	NA	1	NA	NA	NA	1	NA	NA	NA	3.94	0	NA	1	NA	4.03	0	NA	1	NA	1	1	NA	NA	1	13.34	NA	NA	0	3: 2M	3	1	1	2	3.94	4	3	11	51
11795	Good	4m	1	NA	NA	NA	1	NA	NA	NA	1	NA	NA	NA	3.97	0	NA	1	NA	3.59	0	NA	1	NA	1	1	NA	NA	1	12.03	NA	NA	0	4: 4M	4	1	1	2	3.59	4	3	11	140
11795	Good	6m	1	NA	NA	NA	1	NA	NA	NA	1	NA	NA	NA	4.06	0	NA	1	NA	3.54	0	NA	1	NA	1	1	NA	NA	1	12.4	NA	NA	0	5: 6M	5	1	1	2	3.54	4	3	11	189
11815	Poor	hosp	3	NA	3	NA	3	NA	3	NA	4	NA	3	NA	NA	3	NA	NA	NA	NA	3	NA	NA	NA	1	2	NA	NA	0	NA	3	NA	1	2: Hos	2	0	0	0	NA	0	0	0	6
11815	Poor	2m	1	NA	NA	NA	1	NA	NA	NA	2	3.75	NA	NA	7.68	0	NA	1	NA	6.28	0	NA	1	NA	1	1	NA	NA	1	30.57	NA	NA	0	3: 2M	3	1	1	1	6.28	2	1	6	54
11815	Poor	4m	1	NA	NA	NA	2	7.03	NA	NA	4	NA	3	NA	9.56	0	NA	2	NA	7.59	0	NA	2	NA	1	1	NA	NA	0	NA	3	NA	0	4: 4M	4	1	0	0	7.59	2	0	3	108
11815	Poor	6m	1	NA	NA	NA	1	NA	NA	NA	3	2.87	NA	NA	6.22	0	NA	2	NA	6.95	0	NA	2	NA	1	1	NA	NA	0	NA	3	NA	0	5: 6M	5	1	1	0	6.22	2	0	4	192
11863	Good	icu	3	NA	3	NA	3	NA	3	NA	4	NA	3	NA	NA	3	NA	NA	NA	NA	3	NA	NA	NA	1	3	3	NA	0	NA	3	NA	1	1: ICU	1	0	0	0	NA	0	0	0	6
11863	Good	hosp	1	NA	NA	NA	1	NA	NA	NA	1	NA	NA	NA	4.31	0	NA	1	NA	4.53	0	NA	1	NA	1	1	NA	NA	1	40.11	NA	NA	0	2: Hos	2	1	1	2	4.31	4	1	9	12
11863	Good	2m	1	NA	NA	NA	1	NA	NA	NA	4	NA	4	NA	4.13	0	NA	1	NA	3.84	0	NA	1	NA	1	1	NA	NA	1	28.97	NA	NA	0	3: 2M	3	1	1	0	3.84	4	1	7	46
11863	Good	4m	1	NA	NA	NA	1	NA	NA	NA	3	0.74	NA	NA	4.6	0	NA	1	NA	4.19	0	NA	1	NA	1	1	NA	NA	1	17.22	NA	NA	0	4: 4M	4	1	1	0	4.19	4	1	7	109
11863	Good	6m	1	NA	NA	NA	1	NA	NA	NA	1	NA	NA	NA	4.25	0	NA	1	NA	4.03	0	NA	1	NA	1	1	NA	NA	1	24.25	NA	NA	0	5: 6M	5	1	1	2	4.03	4	1	9	193
11922	Poor	icu	3	NA	3	NA	3	NA	3	NA	4	NA	3	NA	NA	3	NA	NA	NA	NA	3	NA	NA	NA	0	3	3	NA	0	NA	3	NA	1	1: ICU	1	0	0	0	NA	0	0	0	10
11922	Poor	hosp	3	NA	6	NA	3	NA	6	NA	4	NA	6	NA	NA	6	NA	NA	NA	NA	6	NA	NA	NA	0	3	6	NA	NA	NA	6	NA	1	2: Hos	2	0	0	0	NA	0	0	0	23
11922	Poor	4m	1	NA	NA	NA	1	NA	NA	NA	1	NA	NA	NA	8	0	NA	1	NA	7.5	0	NA	1	NA	1	2	NA	NA	0	NA	3	NA	0	4: 4M	4	1	1	2	7.5	2	0	6	120
11922	Poor	6m	1	NA	NA	NA	1	NA	NA	NA	1	NA	NA	NA	8.75	0	NA	2	NA	7.84	0	NA	2	NA	1	2	NA	NA	0	NA	3	NA	0	5: 6M	5	1	1	2	7.84	2	0	6	176
12094	Good	hosp	3	NA	1	NA	3	NA	3	NA	4	NA	3	NA	NA	3	NA	NA	NA	NA	3	NA	NA	NA	1	2	NA	NA	0	NA	3	NA	1	2: Hos	2	0	0	0	NA	0	0	0	2
12094	Good	2m	1	NA	NA	NA	1	NA	NA	NA	1	NA	NA	NA	5.41	0	NA	1	NA	4.54	0	NA	1	NA	1	1	NA	NA	1	18.4	NA	NA	0	3: 2M	3	1	1	2	4.54	4	1	9	67
12094	Good	4m	1	NA	NA	NA	1	NA	NA	NA	1	NA	NA	NA	5.04	0	NA	1	NA	5.4	0	NA	1	NA	1	1	NA	NA	1	13.13	NA	NA	0	4: 4M	4	1	1	2	5.04	3	3	10	123
12094	Good	6m	1	NA	NA	NA	1	NA	NA	NA	1	NA	NA	NA	5.68	0	NA	1	NA	6.09	0	NA	1	NA	1	1	NA	NA	1	14.88	NA	NA	0	5: 6M	5	1	1	2	5.68	3	2	9	193
12143	Poor	icu	3	NA	3	NA	3	NA	3	NA	4	NA	3	NA	NA	3	NA	NA	NA	NA	3	NA	NA	NA	0	3	3	NA	0	NA	3	NA	1	1: ICU	1	0	0	0	NA	0	0	0	6
12143	Poor	hosp	1	NA	NA	NA	1	NA	NA	NA	2	3.1	NA	NA	4.06	0	NA	1	NA	6.06	0	NA	1	NA	1	1	NA	NA	1	13.96	NA	NA	0	2: Hos	2	1	1	1	4.06	4	2	9	17
12143	Poor	2m	1	NA	NA	NA	1	NA	NA	NA	1	NA	NA	NA	9.82	0	NA	2	NA	7.25	0	NA	2	NA	1	2	NA	NA	0	NA	3	NA	0	3: 2M	3	1	1	2	7.25	2	0	6	53
12143	Poor	4m	1	NA	NA	NA	1	NA	NA	NA	1	NA	NA	NA	10.09	0	NA	1	NA	8.59	0	NA	1	NA	1	1	NA	NA	0	NA	6	NA	0	4: 4M	4	1	1	2	8.59	2	0	6	111
12143	Poor	6m	1	NA	NA	NA	1	NA	NA	NA	1	NA	NA	NA	9.5	0	NA	2	NA	10.22	0	NA	2	NA	1	1	NA	NA	0	NA	3	NA	0	5: 6M	5	1	1	2	9.5	1	0	5	174

## Sheet: Differential_Metabolites
Metabolite	P_Value	BH_Adjusted_P_Value	BY_Adjusted_P_Value	Storey_Q_Value	Discharge_Good	Discharge_Poor	Fold_Change
alpha-ketoglutarate	0.0318868	0.514349	1	0.387179	0.364215	0.303942	0.870417
5,6-dihydrothymine	0.0157397	0.376738	1	0.283591	0.347247	0.440433	1.23933
adenosine 5'-monophosphate (AMP)	0.0195866	0.415236	1	0.312571	0.414471	0.627304	1.63242
beta-alanine	0.0259776	0.491707	1	0.370135	0.369171	0.311359	0.875363
cystine	0.0125739	0.333207	1	0.250823	0.474494	0.338785	0.731629
malate	0.0442947	0.530107	1	0.399041	0.375352	0.315496	0.871254
fructose	0.0428935	0.530107	1	0.399041	0.407407	0.326301	0.829649
arachidate (20:0)	0.0242305	0.485921	1	0.365779	0.4037	0.308326	0.802834
pentadecanoate (15:0)	0.0428935	0.530107	1	0.399041	0.36139	0.288783	0.846045
4-hydroxyphenylpyruvate	0.047213	0.530788	1	0.399553	0.337867	0.387207	1.12031
taurochenodeoxycholate	0.00757359	0.307836	1	0.231725	0.339712	0.523413	1.52652
glycerol 3-phosphate	0.00524494	0.307836	1	0.231725	0.437966	0.314108	0.751869
2-arachidonoylglycerol (20:4)	0.0268912	0.491707	1	0.370135	0.454163	0.345172	0.778054
1-palmitoylglycerol (16:0)	0.0112134	0.33252	1	0.250306	0.526119	0.363292	0.687342
1-oleoylglycerol (18:1)	0.00569778	0.307836	1	0.231725	0.52839	0.311273	0.606572
2-oleoylglycerol (18:1)	0.0085347	0.311459	1	0.234452	0.467998	0.287513	0.659956
2-linoleoylglycerol (18:2)	0.00201802	0.279811	1	0.210629	0.574292	0.345911	0.591042
threonate	0.0318868	0.514349	1	0.387179	0.37275	0.297135	0.840203
1-linoleoylglycerol (18:2)	0.00263972	0.279811	1	0.210629	0.548426	0.312558	0.580941
octanoylcarnitine (C8)	0.0340973	0.530107	1	0.399041	0.344634	0.431607	1.22172
hyocholate	0.0402035	0.530107	1	0.399041	0.336672	0.447981	1.29214
HWESASXX	0.0352508	0.530107	1	0.399041	0.280964	0.388758	1.28172
1-pentadecanoylglycerol (15:0)	0.00139736	0.279811	1	0.210629	0.497723	0.292871	0.623947
1-arachidonylglycerol (20:4)	0.00727548	0.307836	1	0.231725	0.475322	0.321302	0.701422
1-linolenoylglycerol (18:3)	0.00923463	0.311459	1	0.234452	0.593432	0.352678	0.574442
1-docosahexaenoylglycerol (22:6)	0.0146141	0.361457	1	0.272088	0.467573	0.316224	0.70575
2-hydroxy-3-methylvalerate	0.0210399	0.433656	1	0.326437	0.323572	0.249686	0.843556
1-palmitoyl-GPE (16:0)	0.0442947	0.530107	1	0.399041	0.396609	0.334075	0.865897
1-oleoyl-GPE (18:1)	0.0308285	0.514349	1	0.387179	0.474985	0.389385	0.821106
1-linoleoyl-GPE (18:2)	0.00425167	0.307836	1	0.231725	0.538442	0.412331	0.747978
1-arachidonoyl-GPE (20:4n6)	0.0376579	0.530107	1	0.399041	0.477226	0.393141	0.823975
N-acetyl-aspartyl-glutamate (NAAG)	0.00192854	0.279811	1	0.210629	0.263282	0.195257	0.855017
1-myristoylglycerol (14:0)	0.00100412	0.279811	1	0.210629	0.656962	0.34516	0.48775
glycerophosphoethanolamine	0.0116516	0.33252	1	0.250306	0.414794	0.336061	0.834194
dihomo-linolenate (20:3n3 or n6)	0.012105	0.332662	1	0.250413	0.366553	0.292277	0.842798
o-cresol sulfate	0.0415301	0.530107	1	0.399041	0.289979	0.223631	0.858325
1-stearoyl-2-oleoyl-GPE (18:0/18:1)	0.0442947	0.530107	1	0.399041	0.365066	0.304228	0.869284
1-palmitoyl-2-linoleoyl-GPE (16:0/18:2)	0.0415301	0.530107	1	0.399041	0.369262	0.299038	0.850701
glycocholenate sulfate	0.0188934	0.415236	1	0.312571	0.27511	0.372843	1.25237
taurocholenate sulfate	0.00241531	0.279811	1	0.210629	0.244186	0.39886	1.42782
2-hydroxyglutarate	0.038913	0.530107	1	0.399041	0.35904	0.281337	0.836175
leucylalanine	0.0457342	0.530231	1	0.399134	0.356364	0.448028	1.23499
2-stearoyl-GPE (18:0)	0.028802	0.497001	1	0.37412	0.453049	0.349429	0.787736
myristoleoylcarnitine (C14:1)	0.0116516	0.33252	1	0.250306	0.335013	0.422022	1.22183
1-dihomo-linolenylglycerol (20:3)	0.00263972	0.279811	1	0.210629	0.497663	0.359583	0.727647
sphingomyelin (d18:1/20:2, d18:2/20:1, d16:1/22:2)	0.0278324	0.491707	1	0.370135	0.310974	0.367406	1.13876
glycochenodeoxycholate 3-sulfate	0.00727548	0.307836	1	0.231725	0.390779	0.598342	1.61273
1-palmitoleoylglycerol (16:1)	0.00407479	0.307836	1	0.231725	0.55225	0.3227	0.589454
2-palmitoleoylglycerol (16:1)	0.00462647	0.307836	1	0.231725	0.484638	0.314985	0.676625
palmitoyl-linoleoyl-glycerol (16:0/18:2) [2]	0.0135601	0.346953	1	0.26117	0.433952	0.34155	0.808347
1-(1-enyl-palmitoyl)-2-linoleoyl-GPE (P-16:0/18:2)	0.0457342	0.530231	1	0.399134	0.435382	0.340544	0.803827
1-oleoyl-2-docosahexaenoyl-GPC (18:1/22:6)	0.0259776	0.491707	1	0.370135	0.319045	0.362898	1.10625
glycochenodeoxycholate glucuronide (1)	0.038913	0.530107	1	0.399041	0.235209	0.353002	1.31157
palmitoleoylcarnitine (C16:1)	0.0163306	0.378666	1	0.285043	0.346827	0.433269	1.22023
linoleoyl-arachidonoyl-glycerol (18:2/20:4) [1]	0.047213	0.530788	1	0.399553	0.441663	0.356303	0.821562
oleoyl-arachidonoyl-glycerol (18:1/20:4) [1]	0.0364374	0.530107	1	0.399041	0.4197	0.33704	0.826685
N-behenoyl-sphingadienine (d18:2/22:0)	0.0078826	0.307836	1	0.231725	0.371051	0.281374	0.813435
ceramide (d18:1/20:0, d16:1/22:0, d20:1/18:0)	0.0195866	0.415236	1	0.312571	0.435323	0.358646	0.838152
cerotoylcarnitine (C26)	0.0103807	0.33252	1	0.250306	0.377138	0.488277	1.29163
ximenoylcarnitine (C26:1)	0.00593716	0.307836	1	0.231725	0.367189	0.479462	1.29501
5-dodecenoylcarnitine (C12:1)	0.0352508	0.530107	1	0.399041	0.334264	0.421472	1.22238
2,2'-methylenebis(6-tert-butyl-p-cresol)	0.00923463	0.311459	1	0.234452	0.414532	0.316718	0.798337
1-heptadecenoylglycerol (17:1)	0.0078826	0.307836	1	0.231725	0.475746	0.312783	0.687127
fibrinopeptide A (8-16)	0.0487317	0.539686	1	0.406251	0.291509	0.353127	1.15244
fibrinopeptide B (1-11)	0.0364374	0.530107	1	0.399041	0.424358	0.550601	1.33734
taurochenodeoxycholic acid 3-sulfate	0.00757359	0.307836	1	0.231725	0.336524	0.549116	1.63152
2-hydroxy-4-(methylthio)butanoic acid	0.0278324	0.491707	1	0.370135	0.30552	0.240897	0.861742
Metabolite	P_Value	BH_Adjusted_P_Value	BY_Adjusted_P_Value	Storey_Q_Value	D5_Good	D5_Poor	Fold_Change
ursodeoxycholate	0.0441234	1	1	1	0.392083	0.217481	0.668956
dihomo-linoleate (20:2n6)	0.0472152	1	1	1	0.378302	0.284166	0.805127
12-HHTrE	0.0106064	1	1	1	0.591629	0.374372	0.606377
stearoyl sphingomyelin (d18:1/18:0)	0.012479	1	1	1	0.369571	0.294433	0.841128
taurochenodeoxycholate	0.0472152	1	1	1	0.261866	0.613213	2.24568
taurocholate	0.00449829	0.831058	1	0.831058	0.301626	0.769455	2.93649
3-methyl-2-oxovalerate	0.00898803	1	1	1	0.339163	0.275518	0.863685
4-methyl-2-oxopentanoate	0.0412042	1	1	1	0.322448	0.268879	0.883956
1-myristoyl-2-palmitoyl-GPC (14:0/16:0)	0.000522264	0.293401	1	0.293401	0.285368	0.434558	1.40991
dehydroepiandrosterone sulfate (DHEA-S)	0.0358546	1	1	1	0.382975	0.247188	0.731497
2-linoleoylglycerol (18:2)	0.0472152	1	1	1	0.591352	0.400666	0.644635
1-linoleoylglycerol (18:2)	0.0358546	1	1	1	0.562126	0.358804	0.626149
androsterone sulfate	0.000794048	0.293401	1	0.293401	0.358164	0.152252	0.622425
epiandrosterone sulfate	0.012479	1	1	1	0.348668	0.221734	0.746563
1-arachidonoyl-GPE (20:4n6)	0.0250045	1	1	1	0.457668	0.352823	0.785517
5alpha-androstan-3beta,17beta-diol disulfate	0.0269128	1	1	1	0.481474	0.254995	0.593636
androstenediol (3alpha, 17alpha) monosulfate (3)	0.002848	0.701556	1	0.701556	0.374873	0.211782	0.686924
1-stearoyl-2-oleoyl-GPC (18:0/18:1)	0.0441234	1	1	1	0.292554	0.35162	1.14569
1-(1-enyl-stearoyl)-2-oleoyl-GPE (P-18:0/18:1)	0.0384504	1	1	1	0.315017	0.390745	1.1905
1-palmitoyl-2-palmitoleoyl-GPC (16:0/16:1)	0.0384504	1	1	1	0.297166	0.385977	1.2269
linoleoyl-linoleoyl-glycerol (18:2/18:2) [1]	0.0289454	1	1	1	0.41543	0.283764	0.738471
Metabolite	P_Value	BH_Adjusted_P_Value	BY_Adjusted_P_Value	Storey_Q_Value	D1_Good	D1_Poor	Fold_Change
alpha-ketobutyrate	0.0326587	0.995942	1	0.995942	0.397804	0.327273	0.850099
guanosine	0.00251485	0.995942	1	0.995942	0.512562	0.373308	0.725681
taurochenodeoxycholate	0.0296492	0.995942	1	0.995942	0.299528	0.564786	1.84187
taurocholate	0.0150426	0.995942	1	0.995942	0.293632	0.560491	1.84867
3-methyl-2-oxovalerate	0.0287005	0.995942	1	0.995942	0.364731	0.283483	0.829377
2-isopropylmalate	0.00592123	0.995942	1	0.995942	0.509616	0.312922	0.635778
3-indoxyl sulfate	0.0446485	0.995942	1	0.995942	0.523884	0.364023	0.692052
4-methyl-2-oxopentanoate	0.0260097	0.995942	1	0.995942	0.381058	0.297585	0.825137
alpha-hydroxyisocaproate	0.0108708	0.995942	1	0.995942	0.378625	0.305694	0.845412
3-methyl-2-oxobutyrate	0.0382559	0.995942	1	0.995942	0.357846	0.293098	0.861493
androsterone sulfate	0.0433024	0.995942	1	0.995942	0.440622	0.324852	0.766001
trigonelline (N'-methylnicotinate)	0.00747004	0.995942	1	0.995942	0.541957	0.298292	0.570604
sebacate (C10-DC)	0.0342572	0.995942	1	0.995942	0.28768	0.38408	1.24853
piperine	0.0337183	0.995942	1	0.995942	0.58309	0.421334	0.689039
epiandrosterone sulfate	0.0474468	0.995942	1	0.995942	0.461816	0.343152	0.760915
4-vinylphenol sulfate	0.0212761	0.995942	1	0.995942	0.631156	0.385863	0.568468
5alpha-pregnan-3beta,20alpha-diol disulfate	0.0337183	0.995942	1	0.995942	0.476325	0.335781	0.723529
pregnenolone sulfate	0.0121302	0.995942	1	0.995942	0.504397	0.364058	0.72387
linoleoyl-arachidonoyl-glycerol (18:2/20:4) [1]	0.0260097	0.995942	1	0.995942	0.349228	0.276646	0.846092
dodecadienoate (12:2)	0.0460297	0.995942	1	0.995942	0.364753	0.295539	0.852678
fibrinopeptide B (1-9)	0.0460297	0.995942	1	0.995942	0.292892	0.386259	1.23984

## Sheet: PLS-DA-Result
	Comp. 1	Comp. 2	Comp. 3	Comp. 4	Comp. 5	Comp. 6	Comp. 7	Comp. 8
1-myristoylglycerol (14:0)	1.5385	1.3072	1.2256	1.175	1.1198	1.0983	1.0809	1.0786
1-pentadecanoylglycerol (15:0)	1.4873	1.3033	1.1998	1.161	1.1183	1.0916	1.0788	1.0724
1-linoleoylglycerol (18:2)	1.4705	1.342	1.2492	1.21	1.166	1.1422	1.1214	1.1097
2-linoleoylglycerol (18:2)	1.4396	1.3346	1.2371	1.1923	1.1582	1.1424	1.1254	1.1061
ximenoylcarnitine (C26:1)	1.3966	1.1622	1.1412	1.0863	1.0509	1.0259	1.1069	1.0868
5,6-dihydrothymine	1.3865	1.1547	1.1277	1.0755	1.027	1.0199	1.0493	1.0306
1-linoleoyl-GPE (18:2)	1.3795	1.2706	1.2332	1.2034	1.1895	1.1676	1.1726	1.1738
1-oleoylglycerol (18:1)	1.2997	1.2919	1.1894	1.1328	1.1052	1.0794	1.0589	1.041
1-linolenoylglycerol (18:3)	1.2864	1.1943	1.1307	1.0824	1.0671	1.0845	1.0807	1.0633
1-palmitoleoylglycerol (16:1)	1.265	1.2448	1.154	1.1005	1.0647	1.044	1.0433	1.0648
2-oleoylglycerol (18:1)	1.2625	1.295	1.1923	1.1368	1.0857	1.0599	1.0399	1.0248
taurocholenate sulfate	1.2616	1.0626	0.97904	0.98185	1.0326	1.0593	1.0399	1.025
palmitoleoylcarnitine (C16:1)	1.2583	1.0555	1.0588	1.0778	1.0469	1.0524	1.0397	1.0488
2-palmitoleoylglycerol (16:1)	1.2235	1.1423	1.0861	1.0515	1.0135	0.99985	0.98471	0.96748
glycocholenate sulfate	1.1979	1.0015	0.92908	0.93674	0.89293	0.87635	0.87608	0.94338
myristoleoylcarnitine (C14:1)	1.1865	1.0336	1.0515	1.0804	1.0637	1.0564	1.0624	1.0909
5-dodecenoylcarnitine (C12:1)	1.1857	1.0408	1.0587	1.0552	1.0852	1.0665	1.0773	1.1092
octanoylcarnitine (C8)	1.1798	1.0169	1.0545	1.0448	1.0264	1.0073	0.99585	0.98805
glycochenodeoxycholate 3-sulfate	1.1599	1.0004	0.97681	0.9299	0.90137	0.87985	0.94651	0.93265
cerotoylcarnitine (C26)	1.1564	0.98366	0.93337	0.89097	0.84933	0.84288	0.85145	0.94087
1-heptadecenoylglycerol (17:1)	1.1485	1.1551	1.0779	1.0387	1.0573	1.04	1.0326	1.0139
glycochenodeoxycholate glucuronide (1)	1.1459	0.95326	0.88004	0.83995	0.81676	0.824	0.81918	0.80433
1-palmitoylglycerol (16:0)	1.1343	1.2284	1.1375	1.1214	1.336	1.347	1.3307	1.3095
hyocholate	1.0774	0.96014	1.0554	1.4166	1.3557	1.331	1.3106	1.3057
1-arachidonylglycerol (20:4)	1.0622	1.214	1.1441	1.0951	1.0454	1.0386	1.0256	1.016
taurochenodeoxycholic acid 3-sulfate	1.0215	0.94235	1.0403	0.99068	0.94469	0.92967	0.94738	0.93015
adenosine 5'-monophosphate (AMP)	1.0205	0.85269	0.83036	0.83415	0.82971	0.93807	0.93443	0.94131
fibrinopeptide B (1-11)	1.0197	0.87487	0.8731	0.93105	0.896	0.87466	0.8606	0.87651
leucylalanine	1.003	0.9323	0.89739	0.90209	0.93713	0.94155	0.92743	1.0168
N-behenoyl-sphingadienine (d18:2/22:0)	0.99546	1.0688	1.0154	1.0014	1.1657	1.1486	1.1269	1.1065
pentadecanoate (15:0)	0.99134	0.86504	0.80218	0.91306	0.87207	0.85416	0.83803	0.82427
1-oleoyl-2-docosahexaenoyl-GPC (18:1/22:6)	0.98947	0.99753	1.2657	1.2069	1.1502	1.1285	1.1073	1.0888
2-hydroxy-3-methylvalerate	0.9649	1.8094	1.6968	1.6302	1.5699	1.5328	1.5129	1.4906
arachidate (20:0)	0.95049	0.79109	0.80358	0.79223	0.75684	0.75556	0.74131	0.74439
sphingomyelin (d18:1/20:2, d18:2/20:1, d16:1/22:2)	0.94374	0.81843	1.0086	1.0148	0.97357	0.95216	0.94759	0.93512
palmitoyl-linoleoyl-glycerol (16:0/18:2) [2]	0.94338	0.78932	0.72893	0.79819	0.81014	0.84938	0.83788	0.8508
HWESASXX	0.93626	0.92918	1.0297	0.99126	1.1671	1.1458	1.1416	1.1208
2-stearoyl-GPE (18:0)	0.92791	0.82666	0.97375	0.93714	0.90257	0.92999	0.91278	0.89985
1-dihomo-linolenylglycerol (20:3)	0.91942	1.1938	1.1302	1.0796	1.042	1.0171	1.0882	1.1037
4-hydroxyphenylpyruvate	0.90184	0.77803	0.88622	0.85696	0.84841	0.83224	0.81891	0.80542
glycerol 3-phosphate	0.89886	0.82961	0.8956	0.86023	0.83275	0.94269	0.92491	0.92132
cystine	0.87784	1.3316	1.2526	1.2875	1.2699	1.2397	1.2189	1.2141
1-arachidonoyl-GPE (20:4n6)	0.86273	0.71873	0.80096	0.78154	0.74522	0.74166	0.74572	0.73226
dihomo-linolenate (20:3n3 or n6)	0.86242	0.71756	0.81992	0.82339	0.82436	0.8861	0.87029	0.8551
1-docosahexaenoylglycerol (22:6)	0.86166	1.1677	1.0851	1.0331	0.98884	0.99262	0.97382	0.95722
glycerophosphoethanolamine	0.78758	0.7086	1.0489	1.0563	1.0109	1.0671	1.0495	1.0543
fibrinopeptide A (8-16)	0.75632	0.63555	0.73838	0.72458	0.85164	0.83196	0.84325	0.85288
taurochenodeoxycholate	0.74824	0.8152	0.7975	0.80027	0.85133	0.83114	0.83358	0.82525
1-(1-enyl-palmitoyl)-2-linoleoyl-GPE (P-16:0/18:2)	0.7393	0.95334	0.98634	1.1633	1.1195	1.0934	1.0739	1.0558
1-oleoyl-GPE (18:1)	0.73448	0.63207	0.92413	0.98117	1.0473	1.0488	1.0392	1.0233
ceramide (d18:1/20:0, d16:1/22:0, d20:1/18:0)	0.72419	0.9684	0.91444	1.0293	1.0187	1.0117	0.99541	0.99327
2,2'-methylenebis(6-tert-butyl-p-cresol)	0.70926	0.92326	0.86393	0.94225	0.93894	0.99542	0.98174	0.96385
1-palmitoyl-2-linoleoyl-GPE (16:0/18:2)	0.67538	0.85504	0.83053	0.82796	0.79009	0.88546	0.89557	0.89123
2-arachidonoylglycerol (20:4)	0.67235	1.1476	1.0909	1.0756	1.1239	1.1193	1.1009	1.0877
2-hydroxyglutarate	0.66988	0.71463	0.81402	0.80993	0.82603	0.8926	0.87982	0.86459
oleoyl-arachidonoyl-glycerol (18:1/20:4) [1]	0.66391	0.89482	0.88157	0.9055	0.88088	0.86671	0.88764	0.87927
1-stearoyl-2-oleoyl-GPE (18:0/18:1)	0.63922	0.5845	0.71167	0.73116	0.75575	0.84958	0.87506	0.86741
N-acetyl-aspartyl-glutamate (NAAG)	0.62457	0.85585	0.818	0.91612	1.0016	0.99694	0.98517	1.1286
2-hydroxy-4-(methylthio)butanoic acid	0.5964	1.024	0.99341	0.99483	0.95662	0.93478	0.92756	0.91415
linoleoyl-arachidonoyl-glycerol (18:2/20:4) [1]	0.59535	0.78467	0.75336	0.96355	0.92873	0.96942	0.95475	0.9374
1-palmitoyl-GPE (16:0)	0.56621	0.48336	0.86047	0.81934	0.78213	0.87513	0.86364	0.88784
fructose	0.51532	0.85204	0.84046	0.82683	0.8006	0.78151	0.76915	0.84483
malate	0.47023	0.82483	0.91618	0.87846	0.87635	0.86285	1.0337	1.0226
o-cresol sulfate	0.46967	0.48412	0.57113	0.56612	0.56631	0.61666	0.6181	0.63459
threonate	0.45208	0.58921	0.61761	0.68115	1.087	1.0616	1.0584	1.0505
alpha-ketoglutarate	0.43513	0.53514	0.70139	0.70215	0.69593	0.69671	0.87542	0.88241
beta-alanine	0.41414	0.70795	0.79841	0.76065	0.93306	0.91102	0.92111	0.91237

## Sheet: Pathway_Analysis_Day1
	Total	Expected	Hits	Raw p	#NAME?	Holm adjust	FDR	Impact
Valine, leucine and isoleucine biosynthesis	8	0.035556	4	9.5335e-09	8.0207	7.6268e-07	7.6268e-07	0
Valine, leucine and isoleucine degradation	40	0.17778	3	0.00049551	3.3049	0.039146	0.019821	0.03252
Primary bile acid biosynthesis	46	0.20444	2	0.015966	1.7968	1	0.42575	0.01782
Taurine and hypotaurine metabolism	8	0.035556	1	0.035084	1.4549	1	0.70168	0
Pantothenate and CoA biosynthesis	20	0.088889	1	0.085731	1.0669	1	1	0
Propanoate metabolism	22	0.097778	1	0.093946	1.0271	1	1	0.04103
Glycine, serine and threonine metabolism	33	0.14667	1	0.13801	0.86009	1	1	0
Cysteine and methionine metabolism	33	0.14667	1	0.13801	0.86009	1	1	0.05983
Purine metabolism	70	0.31111	1	0.27302	0.5638	1	1	0

## Sheet: Pathway_Analysis_day5
	Total	Expected	Hits	Raw p	#NAME?	Holm adjust	FDR	Impact
Valine, leucine and isoleucine biosynthesis	8	0.030476	2	0.00033541	3.4744	0.026832	0.026832	0
Valine, leucine and isoleucine degradation	40	0.15238	2	0.0088469	2.0532	0.69891	0.30984	0.02168
Primary bile acid biosynthesis	46	0.17524	2	0.011619	1.9348	0.90629	0.30984	0.01782
Taurine and hypotaurine metabolism	8	0.030476	1	0.030139	1.5209	1	0.60278	0
Sphingolipid metabolism	32	0.1219	1	0.11605	0.93534	1	1	0
Steroid hormone biosynthesis	87	0.33143	1	0.28929	0.53867	1	1	0

## Sheet: Pathway_Analysis_Discharge
	Total	Expected	Hits	Raw p	#NAME?	Holm adjust	FDR	Impact
Butanoate metabolism	15	0.15238	2	0.0094096	2.0264	0.75277	0.66119	0
Citrate cycle (TCA cycle)	20	0.20317	2	0.01653	1.7817	1	0.66119	0.10268
Alanine, aspartate and glutamate metabolism	28	0.28444	2	0.031366	1.5035	1	0.6649	0.09616
Phenylalanine, tyrosine and tryptophan biosynthesis	4	0.040635	1	0.040057	1.3973	1	0.6649	0
Biosynthesis of unsaturated fatty acids	36	0.36571	2	0.049868	1.3022	1	0.6649	0
Glycerophospholipid metabolism	36	0.36571	2	0.049868	1.3022	1	0.6649	0.12382
Ascorbate and aldarate metabolism	9	0.091429	1	0.088015	1.0554	1	0.9361	0
Arginine biosynthesis	14	0.14222	1	0.13372	0.87381	1	0.9361	0
Glycerolipid metabolism	16	0.16254	1	0.15139	0.8199	1	0.9361	0.04361
Starch and sucrose metabolism	18	0.18286	1	0.16873	0.77282	1	0.9361	0.00457
Ubiquinone and other terpenoid-quinone biosynthesis	18	0.18286	1	0.16873	0.77282	1	0.9361	0.07692
Pentose and glucuronate interconversions	19	0.19302	1	0.17727	0.75137	1	0.9361	0.10843
Ether lipid metabolism	20	0.20317	1	0.18573	0.73112	1	0.9361	0
Pantothenate and CoA biosynthesis	20	0.20317	1	0.18573	0.73112	1	0.9361	0.04762
Fructose and mannose metabolism	20	0.20317	1	0.18573	0.73112	1	0.9361	0.09765
beta-Alanine metabolism	21	0.21333	1	0.19411	0.71196	1	0.9361	0.39925
Propanoate metabolism	22	0.22349	1	0.2024	0.69378	1	0.9361	0
Pyruvate metabolism	23	0.23365	1	0.21062	0.6765	1	0.9361	0.0283
Galactose metabolism	27	0.27429	1	0.2427	0.61492	1	1	0
Lipoic acid metabolism	28	0.28444	1	0.25053	0.60114	1	1	0
Glyoxylate and dicarboxylate metabolism	32	0.32508	1	0.28109	0.55116	1	1	0
Sphingolipid metabolism	32	0.32508	1	0.28109	0.55116	1	1	0.21576
Cysteine and methionine metabolism	33	0.33524	1	0.28854	0.53979	1	1	0
Pyrimidine metabolism	39	0.39619	1	0.33177	0.47916	1	1	0
Amino sugar and nucleotide sugar metabolism	42	0.42667	1	0.35245	0.4529	1	1	0
Tyrosine metabolism	42	0.42667	1	0.35245	0.4529	1	1	0.08276
Primary bile acid biosynthesis	46	0.4673	1	0.37909	0.42126	1	1	0.00977
Purine metabolism	70	0.71111	1	0.51856	0.2852	1	1	0.06569

[truncated: 3 more sheets: ChemRICH_Day1, ChemRICH_Day5, ChemRICH_Discharge]
